# Supplementary material for: Food Palatability Directs Our Eyes Across Contexts
Source: Frontiers journal article supplement (doi:10.3389/fpsyg.2021.664893), 2021-05-31
Supplement: Data_Sheet_1.zip [file HealthyOutput_TLBSParamsFood_S1.xlsx]

## Sheet: Sheet1
SubjNum_FoodS1	traditionalBS_FoodS1	MeanTwd_FoodS1	MeanAwy_FoodS1	PeakTwd_FoodS1	PeakAwy_FoodS1	Variability_FoodS1	MeanTwdNT_FoodS1	MeanAwyNT_FoodS1	PeakTwdNT_FoodS1	PeakAwyNT_FoodS1	VariabilityNT_FoodS1	NumMatches_FoodS1	NumMatchesNT_FoodS1	MeanDist_FoodS1	MeanDistNT_FoodS1	SDDists_FoodS1	SDDistsNT_FoodS1
111	0.6	80.9	-81.5862	289	-246	104.345	72.4878	-59.9487	375	-203	94.0412	59	80	1.67797	1.6625	0.918032	0.913246
112	13.4699	88.7188	-92.1667	274	-273	111.952	71.814	-86.1818	181	-276	100.666	56	75	1.82143	1.94667	1.12988	1.10151
113	-6.05	68.2759	-97.1071	207	-323	103.667	77.122	-81.1	239	-236	104.065	57	80	1.5614	1.725	0.756343	0.993332
114	16.0026	125.296	-118.083	387	-335	164.647	124.676	-107.771	415	-381	151.668	51	69	1.56863	1.85507	0.78115	1.14115
115	32.9609	138.68	-109.743	328	-308	150.726	128.765	-114.167	423	-436	161.337	60	79	1.9	1.97468	1.13047	1.17642
116	-44.4615	135.5	-86.3077	326	-276	125.739	101.212	-108.651	360	-334	131.319	57	76	1.96491	1.68421	1.13334	1.00943
117	-1.21622	42.3448	-42.5	195	-144	57.7804	41.1351	-43.3947	250	-181	64.3659	57	74	1.73684	1.93243	0.916638	1.20877
118	3.47568	162.265	-207.174	700	-614	242.585	172.45	-198.629	639	-743	252.912	57	74	2.15789	1.7973	1.20697	1.04658
119	-20.3	171.839	-217.923	657	-490	249.791	162.023	-169.395	554	-661	222.944	57	80	1.84211	1.55	0.996234	0.761411
120	-19.525	65.9167	-94.4	192	-263	99.313	51.1818	-56.7317	248	-206	72.46	54	73	1.81481	1.94521	0.991931	1.17722
121	70.3724	141.132	-104.188	428	-281	151.173	154.72	-109.464	598	-407	168.539	54	78	1.90741	1.51282	1.06874	0.936193
122	3.61134	61.7407	-71.6667	271	-247	93.3349	66.9535	-73.1212	276	-256	97.3963	54	76	2.11111	2.07895	1.22346	1.27293
123	-0.586486	60.6667	-80.5	248	-296	93.3974	95.9722	-85	380	-353	129.844	57	76	1.78947	1.60526	0.81803	0.98087
124	-5.32895	84.8387	-96.0357	221	-295	115.115	83.5676	-77.8293	224	-325	101.497	59	78	1.76271	1.69231	1.00583	0.984394
211	-4.82389	77.9032	-100.087	319	-350	121.968	87.4167	-82.75	295	-381	107.797	54	76	1.74074	1.84211	0.872757	1.20058
212	-26.7	62.4412	-110.8	181	-354	112.045	78.7353	-98.9545	461	-351	122.387	58	78	1.72414	1.69231	1.07268	0.930126
213	25.4	184.857	-141.968	825	-616	233.492	181.955	-215.625	414	-658	240.43	59	76	1.88136	1.75	1.01853	1.02144
215	-1.53654	60.4	-68.2647	198	-266	87.7079	74.881	-88.8378	335	-361	116.459	58	79	2.27586	1.59494	1.335	0.855135
216	9.62632	113.586	-159.667	381	-351	166.26	112.943	-114.93	560	-485	152.645	53	78	2.01887	1.70513	1.06501	1.04582
217	19.6891	67.1842	-50.4	208	-142	74.1711	78.0952	-72.425	266	-290	106.483	58	79	2.17241	1.59494	1.12605	0.869998
218	4.29038	63.9032	-61.7857	206	-203	86.2518	67.825	-58.125	196	-177	80.7556	59	79	2.0678	1.56962	1.11207	0.82716
219	15.575	76.3939	-82.3846	256	-186	97.4586	79.7568	-91	212	-266	109.602	59	79	1.94915	1.6962	1.00728	1.01722
220	10.025	96.8125	-70.8519	294	-246	103.965	79.85	-49.35	360	-264	94.5657	59	80	2.0339	1.5125	1.12902	0.841845
221	5.92308	68.6667	-72	163	-228	89.911	62.5405	-61.2195	179	-226	83.3174	59	78	1.88136	1.58974	1.03532	0.931915
222	-24.2579	56.6087	-118.857	244	-416	128.891	121.605	-150.882	385	-413	171.383	57	77	1.91228	1.66234	1.12251	1.04643
223	55.7383	202.943	-111.444	645	-317	201.435	145.364	-188.533	468	-523	209.42	53	74	1.54717	1.83784	0.821959	1.03404
224	2.375	44.75	-51.8889	190	-143	65.5635	41.4359	-42.425	171	-170	56.677	58	79	2.2069	1.58228	1.23911	0.928296
225	14.3947	120.926	-133	420	-563	169.922	165.875	-109.6	396	-464	173.242	57	76	1.85965	1.64474	0.875022	0.843863
226	49.4703	124.742	-95.7917	464	-256	148.838	127.426	-108.7	374	-404	148.77	55	77	2.21818	1.44156	1.22763	0.658817
311	-7.875	87.1304	-69.25	225	-205	95.2943	90.4359	-89.575	378	-324	114.543	59	79	2.08475	1.78481	1.20756	1.00856
313	15.641	86.8788	-75.2917	273	-281	105.817	88.8537	-99.4444	369	-318	124.159	57	77	1.94737	1.5974	1.04234	0.92138
314	13.5859	66.0968	-47.8148	175	-95	72.1373	63.9286	-53	203	-189	76.1763	58	75	2.12069	1.81333	1.28524	1.14719
315	-11.5324	95.6522	-81.7419	315	-312	114.9	104.03	-116.455	352	-268	133.55	54	77	2.07407	1.74026	1.13023	1.00528
316	9.61538	68.76	-71.3793	243	-283	95.7843	82.4571	-76.2051	295	-222	101.497	53	74	1.58491	1.81081	0.842021	1.16661
317	19.4615	102.656	-54.6	341	-198	110.94	96.725	-73.1842	386	-333	115.705	55	78	2.32727	1.48718	1.24803	0.716115
318	-5.26667	44.0625	-48.5862	182	-140	65.1656	54.55	-50.975	244	-183	73.19	61	79	2.04918	1.74684	1.14639	1.00599
319	-1.74359	94.8261	-112.758	291	-312	134.979	108.212	-110.512	298	-372	139.774	56	74	1.76786	1.7973	0.934025	1.15841
320	23.65	93.875	-48.4828	260	-194	91.2751	86.0909	-69.9412	212	-190	97.752	60	76	2.18333	1.76316	1.15702	1.05664
321	-4.92436	77.6875	-74.1429	221	-303	98.2702	80.1905	-71.5135	270	-294	98.715	60	79	2.03333	1.68354	1.10418	1.00695
324	12.8556	74.6129	-88.1923	278	-360	111.309	83.0263	-92.025	274	-292	113.067	57	77	1.54386	1.80519	0.708877	1.08869
325	26.8718	154.333	-160.481	592	-670	229.209	120.22	-112.706	476	-591	169.423	57	75	1.98246	1.61333	1.35609	0.92843
326	-34.4303	92.2941	-110.25	231	-409	133.093	104.743	-116.25	390	-436	145.441	53	75	1.71698	1.89333	0.948224	1.21448
327	31.175	112.606	-95.2	292	-311	130.993	105.974	-74.7317	411	-271	119.816	58	79	1.77586	1.79747	0.899183	1.11378
411	46.1442	96.8919	-85.85	421	-278	124.909	158.743	-106.825	400	-329	160.358	57	75	1.87719	1.69333	1.15062	0.972227
412	27.3684	123.517	-99.52	443	-305	150.27	118.75	-113.5	377	-314	147.527	54	76	1.83333	1.57895	0.985747	0.86815
413	16.025	87.6667	-103.261	240	-313	121.772	85.9487	-62.5833	274	-226	100.912	59	75	2.01695	1.81333	1.22463	1.12338
414	16.2355	59.4571	-62.5455	146	-149	73.3888	76.1818	-71.7419	254	-200	93.3294	57	74	1.89474	1.95946	1.08041	1.25446
415	-18.025	105.864	-114.941	358	-424	142.456	108	-103.279	253	-452	140.435	55	76	2.32727	1.68421	1.3885	1.02255
416	4.73013	88.7143	-67.8667	341	-199	101.517	92.8947	-78.9487	273	-270	105.112	57	77	2.01754	1.74026	1.1876	1.05634
417	60.2173	238.472	-126.455	574	-409	235.694	141.366	-135.868	565	-459	181.138	58	79	1.96552	1.59494	1.04236	0.792901
418	-1.53649	80.3571	-62.5172	278	-228	97.5898	77.0811	-69.325	206	-198	91.5758	57	77	2.05263	1.5974	0.933906	0.92138
419	20.0349	110.323	-110.826	273	-365	135.87	87.8	-94.4857	289	-396	117.665	54	75	2.25926	1.66667	1.33438	0.99095
420	50.9231	92.5758	-100.318	306	-235	119.88	114.63	-79.129	356	-297	120.088	55	77	1.87273	1.81818	0.94388	1.1089
421	4.06208	102.037	-86.6667	430	-412	135.403	105.538	-86.1579	347	-401	125.332	54	77	1.7037	1.54545	0.860663	0.752984
422	47.2233	200.758	-196.381	527	-585	244.187	238.571	-192.297	582	-754	274.892	54	72	1.75926	1.94444	1.04494	1.12449
423	-34.6026	57.3182	-92.3784	141	-339	102.896	69.9487	-99.1892	412	-317	115.384	57	76	2.14035	1.65789	1.24554	0.987288
424	-38.325	114.636	-163.943	381	-485	180.586	143.067	-143.979	586	-561	189.229	57	77	1.84211	1.71429	0.978145	1.06199
511	-41.8846	102.3	-118.844	250	-344	136.319	89.3333	-105.075	284	-321	129.312	52	72	1.57692	1.93056	0.893246	1.24839
512	9.90148	105.5	-126.13	359	-467	149.91	146.025	-109.941	502	-338	171.612	55	74	2.01818	1.83784	1.19398	1.13508
513	63.6667	147.622	-119.13	487	-502	178.887	130.575	-104.342	532	-587	166.53	60	78	2.35	1.94872	1.35077	1.13844
514	8.575	95.1765	-100	344	-267	124.871	105.744	-155	277	-368	157.354	58	80	1.81034	1.7	1.06716	0.87728
515	14.8003	128.25	-118.522	398	-341	156.698	109.043	-131.367	466	-430	157.922	47	77	2.17021	1.7013	1.37239	0.904156
516	-0.0801282	88.4286	-77.2857	243	-223	102.924	73.7561	-78.8378	182	-219	95.011	56	78	1.875	1.57692	1.17647	0.933075
517	-9.66599	65.6897	-102.407	248	-357	113.69	71.575	-79.4103	319	-325	108.249	56	77	1.82143	1.38961	1.01098	0.565589
519	-4.95	80.25	-70.1562	275	-339	98.985	69.0263	-60.7381	330	-235	92.0811	56	80	1.98214	1.6625	1.08697	0.825906
520	-8.24615	125.467	-118.355	366	-337	158.912	155.538	-123.571	353	-412	164.918	60	75	2.2	1.66667	1.17603	1.00449
521	-16.4712	36.8462	-54.8438	114	-178	63.7751	50.9189	-53.1628	170	-183	68.9956	57	79	1.85965	1.50633	0.953164	0.731584
522	-20.7179	116.677	-176.273	527	-560	195.396	176.744	-126.205	787	-592	229.486	53	78	1.56604	1.71795	0.796855	1.00515
523	8.425	51.8788	-41.1154	226	-128	64.4811	46.2667	-44.8529	200	-155	63.3276	59	79	2.18644	1.60759	1.12149	0.911715
524	35.7692	126	-148.478	398	-357	166.549	130	-120.794	336	-378	158.069	58	78	1.98276	1.79487	1.1001	1.09733
525	-21.2231	121.036	-151.192	404	-482	182.505	139.857	-197.162	580	-553	213.985	54	79	2	1.75949	1.30312	1.07674
611	33.7122	105.486	-70.9545	460	-244	129.181	122.574	-83.4062	530	-245	141.572	59	79	2.0678	1.63291	1.14266	0.834776
612	10.3915	134.238	-105.185	638	-437	168.312	128.633	-103.824	483	-569	162.647	48	64	1.77083	2.01562	1.05668	1.22788
613	-9.14642	52.4348	-83.6	149	-250	85.9726	79	-106.806	290	-363	123.238	53	71	1.98113	1.61972	1.15176	0.946666
614	-4.36711	112.038	-111.633	272	-310	138.14	140.133	-105.762	365	-279	147.23	56	72	1.91071	1.91667	1.11644	1.21898
615	94.8018	328.522	-232.452	1002	-776	354.492	259.088	-248.194	779	-718	337.047	54	69	1.81481	1.69565	1.08287	1.00447
616	10.8712	58.9697	-55.8462	154	-160	74.3122	51.9149	-56.8065	231	-176	72.914	59	78	2.20339	1.53846	1.12617	0.921494
617	2.51667	89.7407	-70.871	255	-220	99.5357	64.9762	-64.2632	271	-269	92.3902	58	79	2.05172	1.60759	1.099	0.838462
618	19.1883	140.968	-112.24	518	-312	168.191	126.884	-139.061	469	-318	163.166	55	76	2.29091	1.71053	1.39673	1.01739
619	-1.15	68.9643	-68.6429	214	-222	87.7663	70.0571	-59.2045	240	-251	84.6406	55	79	1.98182	1.51899	1.13024	0.782186
621	-9.15	67.3	-73.9474	187	-199	84.2913	79.186	-75.8649	242	-212	99.1439	58	80	1.94828	1.5	0.962861	0.711568
622	13	86.2121	-74.3846	315	-239	107.382	120.833	-95.3171	383	-243	136.864	58	77	2.2069	1.55844	1.10436	0.880991
623	13.4105	79.0833	-94.2857	231	-200	103.97	76.4722	-79.0952	279	-193	100.384	57	78	2.12281	1.55128	1.22577	0.714369
624	-22.1795	111.517	-156.08	302	-275	155.388	174.094	-188.905	428	-636	239.387	54	74	1.75926	2.05405	1.04494	1.33336
625	34.8171	86.9706	-53.8	232	-166	92.1404	98.3947	-65.95	265	-277	107.761	58	76	2.01724	1.75	1.22103	1.03441
												56.3647
