# Supplementary material for: Food Palatability Directs Our Eyes Across Contexts
Source: Frontiers journal article supplement (doi:10.3389/fpsyg.2021.664893), 2021-05-31
Supplement: Data_Sheet_1.zip [file HealthyoutputTrialLevel_Food_S1.xlsx]

## Sheet: Sheet1
111	121	317	1	1	-147	2	-20	1
111	122	337	3	1
111	123	464	2	1	-158	1	-127	1
111	124	306	1	1			-31	2
111	125	363	1	1	45	1	26	3
111	126	318	2	1	44	1	19	4
111	127	362	1	1	-64	1	37	4
111	128	426	2	1	-78	1	-101	3
111	129	348	1	1			23	2
111	130	508	1	1	82	2	183	1
111	131	325	3	1
111	132	312	1	1	2	1	-13	1
111	133	310	2	1	56	1	15	2
111	134	366	1	1	23	1	85	2
111	135	343	2	1			-62	1
111	136	281	3	1
111	137	483	3	1
111	138	309	3	1
111	140	433	3	1
111	141	282	3	1
111	142	347	3	1
111	143	318	2	1	-1	1	29	1
111	144	317	1	1	-35	1	-36	2
111	145	352	2	1			1	1
111	146	353	3	1
111	147	362	2	1	-30	1	-9	1
111	148	332	1	1			-21	2
111	149	419	1	1	84	1	66	3
111	150	335	2	1	-86	1	-33	4
111	151	249	1	1	-105	1	-53	3
111	152	354	2	1	-17	1	-52	2
111	153	337	1	1			35	1
111	154	302	3	1
111	155	329	2	1	155	1	-27	1
111	156	484	1	1			70	1
111	157	414	3	1
111	158	330	2	1	154	2	84	1
111	159	389	2	1	20	2	25	2
111	160	289	2	1	120	1	125	3
111	161	409	1	1			-5	4
111	162	345	1	1	-59	2	33	4
111	164	404	2	1	-113	1	-92	2
111	165	291	1	1			-21	1
111	166	312	3	1
111	167	296	3	1
111	168	377	3	1
111	169	323	2	1	122	1	54	1
111	170	445	1	1			133	1
111	171	312	3	1
111	172	515	2	1	-70	2	-203	1
111	173	452	2	1	-53	3	-104	1
111	174	348	3	1
111	175	359	2	1	40	1	-11	1
111	176	399	1	1	64	1	69	2
111	177	335	2	1			-5	1
111	178	330	3	1
111	179	329	2	1	70	3	1	1
111	180	280	2	1	119	4	348	1
111	181	628	3	1
111	182	316	3	1
111	183	507	3	1
111	184	247	2	1	150	5	75	1
111	185	322	3	1
111	186	375	2	1	22	3	-42	1
111	187	333	3	1
111	188	339	2	1	58	1	-6	1
111	189	397	1	1			64	2
111	190	282	1	1	-44	1	-51	3
111	191	326	2	1	-29	1	70	3
111	192	297	1	1	-69	1	-99	2
111	193	366	2	1			30	1
111	194	396	3	1
111	195	310	1	1	-56	2	-86	1
111	196	655	1	1	289	3	375	1
111	197	280	3	1
111	198	241	3	1
111	199	319	1	1	35	2	78	1
111	200	502	1	1	218	1	135	2
111	201	284	2	1			83	1
111	202	367	3	1
111	203	537	2	1	-209	1	-170	1
111	204	328	1	1			-52	2
111	205	294	1	1	-243	2	-86	1
111	206	380	3	1
111	207	362	1	1	48	4	-18	1
111	208	381	1	1	67	3	-3	2
111	209	313	1	1	-1	2	-71	1
111	210	384	3	1
111	211	314	2	1	72	1	70	1
111	212	386	1	1			91	1
111	213	295	3	1
111	214	279	2	1	107	2	133	1
111	215	412	3	1
111	216	318	2	1	28	2	94	1
111	217	373	2	1	-27	1	39	2
111	218	346	1	1			4	2
111	219	405	1	1	32	2	63	1
111	220	342	3	1
111	221	344	1	1	-73	2	-67	1
111	222	411	3	1
111	223	417	2	1	-93	2	-2	1
111	224	415	3	1
111	225	324	1	1			-91	1
111	226	313	1	1	-17	2	2	1
111	227	311	3	1
111	228	330	2	1	-62	2	-19	1
111	229	422	2	1	-154	1	-111	2
111	230	268	1	1			-92	3
111	231	365	1	1	39	1	5	2
111	232	326	2	1			34	1
111	233	360	3	1
111	234	303	2	1	62	3	39	1
111	235	342	3	1
111	236	385	3	1
111	237	577	2	1	-246	2	-192	1
111	238	358	2	1	-27	1	27	2
111	239	331	1	1			-54	3
112	120	433	1	1	100	1
112	121	333	2	1	55	1
112	122	388	1	1	147	1
112	123	241	2	1	274	1
112	124	515	1	1			177	5
112	125	396	1	1	104	1	58	4
112	126	292	2	1			46	3
112	127	334	2	1	41	1	4	2
112	128	375	1	1			37	1
112	129	338	3	1
112	130	303	3	1
112	131	329	1	1	-182	3	42	1
112	132	287	3	1
112	133	333	3	1
112	134	511	2	1	-161	2	-195	1
112	135	316	3	1
112	136	350	1	1			30	1
112	137	320	3	1
112	138	301	3	1
112	139	317	1	1	-139	1	16	1
112	140	456	2	1			-155	2
112	141	338	2	1	122	1	-37	3
112	142	460	1	1			159	4
112	143	476	1	1	109	1	155	5
112	144	367	2	1			-46	4
112	145	328	2	1	-33	1	-7	3
112	146	295	1	1			-26	2
112	147	325	1	1	-3	2	4	1
112	148	321	3	1
112	149	328	3	1
112	150	236	2	1	89	3	92	1
112	151	364	2	1	-143	4	-156	2
112	152	272	2	1	-51	3	-64	1
112	153	208	3	1
112	154	355	3	1
112	155	221	1	1	-44	1	-134	1
112	156	265	2	1	44	1	28	2
112	157	309	1	1			16	1
112	158	293	3	1
112	159	329	3	1
112	160	313	2	1	-4	3	52	1
112	161	365	3	1
112	162	280	3	1
112	163	339	3	1
112	164	316	1	1	-56	1	-23	1
112	165	372	2	1	17	1	-33	2
112	166	389	1	1	103	1	50	3
112	167	286	2	1			86	3
112	168	332	2	1	-17	1	40	2
112	169	315	1	1			-57	1
112	170	372	3	1
112	171	269	3	1
112	172	376	1	1	44	4	107	1
112	173	384	1	1	44	5	105	1
112	174	279	3	1
112	175	288	3	1
112	176	351	1	1	11	2	63	1
112	177	356	1	1	16	1	68	2
112	178	340	2	1	80	1	-52	3
112	179	420	1	1			0	3
112	180	347	1	1	-154	1	-73	2
112	181	501	2	1			-81	1
112	182	420	3	1
112	183	380	1	1	-121	2	81	1
112	184	299	3	1
112	185	284	3	1
112	186	394	2	1	-14	3	-90	1
112	187	304	3	1
112	188	341	3	1
112	189	420	2	1			-95	1
112	190	325	3	1
112	191	306	2	1	-13	4	104	1
112	192	410	3	1
112	193	409	2	1	-116	2	1	1
112	194	426	2	1	-133	1	-16	2
112	195	293	1	1			-164	3
112	196	311	1	1	-115	2	-146	2
112	197	432	1	1	6	3	-25	1
112	198	457	3	1
112	199	330	3	1
112	200	306	1	1	33	1	-24	1
112	201	273	2	1	130	1	57	2
112	202	403	1	1	35	1	73	3
112	203	368	2	1	81	1	-38	4
112	204	449	1	1	118	1	4	4
112	205	331	2	1			114	3
112	206	376	2	1	-90	1	69	2
112	207	286	1	1			-159	1
112	208	445	3	1
112	209	559	2	1	-273	2	-114	1
112	210	415	2	1	-20	2	-116	1
112	211	299	3	1
112	212	395	1	1			96	1
112	213	434	1	1	73	2	135	2
112	214	503	1	1	142	1	46	3
112	215	361	2	1			96	2
112	216	281	2	1	222	2	176	1
112	217	457	3	1
112	218	403	2	1	18	2	54	1
112	219	278	2	1	143	1	179	2
112	220	421	1	1			-36	3
112	221	435	1	1	175	1	-6	4
112	222	260	2	1			181	3
112	223	287	2	1	-25	1	154	2
112	224	262	1	1			-179	1
112	225	441	3	1
112	226	410	3	1
112	227	440	1	1	-135	1	30	1
112	228	575	2	1			-276	2
112	229	297	2	1	143	2	2	1
112	230	299	3	1
112	231	403	3	1
112	232	375	1	1	78	3	-28	1
112	233	339	1	1	42	4	1	2
112	235	338	3	1
112	236	407	3	1
112	238	509	2	1	-170	5	-193	1
112	239	316	3	1
113	121	443	2	1			181	1
113	122	624	3	1
113	123	369	3	1
113	124	357	3	1
113	125	512	2	1	-113	2	-133	1
113	126	379	3	1
113	127	399	1	1	22	1	20	1
113	128	377	2	1			2	2
113	129	458	2	1	-59	2	-8	2
113	130	426	2	1	-27	3	24	1
113	131	450	3	1
113	132	444	3	1
113	133	464	3	1
113	134	400	2	1	126	1	64	1
113	135	526	1	1	75	1	80	2
113	136	451	2	1			-5	1
113	137	446	3	1
113	138	413	3	1
113	139	550	1	1	-43	3	137	1
113	140	417	1	1	-176	2	12	1
113	141	405	3	1
113	142	593	2	1			-236	1
113	143	357	3	1
113	144	558	2	1	-81	2	-201	1
113	145	454	2	1	23	1	-97	2
113	146	477	1	1	33	1	-152	2
113	147	444	2	1			185	1
113	148	629	3	1
113	149	548	2	1	-55	2	-16	1
113	150	532	3	1
113	151	493	1	1	-92	2	-39	1
113	152	502	1	1	-83	1	-139	2
113	153	585	2	1			56	1
113	154	641	3	1
113	155	428	2	1	79	2	213	1
113	156	449	2	1	58	1	192	2
113	157	507	1	1	80	1	-134	3
113	158	427	2	1	27	1	214	4
113	159	454	1	1			-52	4
113	160	437	1	1	-202	1	-69	3
113	161	639	2	1	-218	1	-133	2
113	162	421	1	1			-85	1
113	163	506	3	1
113	164	522	2	1	49	2	-16	1
113	165	474	2	1	97	1	32	2
113	166	571	1	1			66	3
113	167	473	1	1	-68	1	-32	2
113	168	541	2	1			-36	1
113	169	505	3	1
113	170	420	2	1	53	3	85	1
113	171	451	2	1	122	4	0	1
113	172	451	3	1
113	173	479	3	1
113	174	500	3	1
113	175	573	1	1	113	1	73	1
113	176	460	2	1			36	1
113	177	496	3	1
113	178	478	3	1
113	179	474	2	1	146	1	4	1
113	180	620	1	1			239	2
113	181	540	1	1	66	2	159	1
113	182	381	3	1
113	183	396	1	1	-14	1	15	1
113	184	410	2	1	30	1	40	2
113	185	440	1	1			-10	1
113	186	450	3	1
113	187	423	1	1	-74	1	-27	1
113	188	497	2	1			-47	2
113	189	576	2	1	-153	2	-126	3
113	190	525	2	1	61	2	-75	4
113	191	630	2	1	-44	1	-180	5
113	192	586	1	1	-151	1	12	5
113	193	737	2	1	-323	1	-163	4
113	194	414	1	1			-160	3
113	195	714	1	1	207	1	140	2
113	196	507	2	1			67	1
113	197	574	3	1
113	198	421	3	1
113	199	537	1	1	-77	3	103	1
113	200	434	3	1
113	201	531	3	1
113	202	614	2	1	-195	2	-83	1
113	203	529	2	1	-110	1	2	2
113	204	419	1	1			-44	2
113	205	500	1	1	-29	2	37	1
113	206	463	3	1
113	207	433	1	1	-34	1	-30	1
113	208	467	2	1	27	1	56	2
113	209	494	1	1			-29	1
113	210	523	3	1
113	211	440	3	1
113	212	512	3	1
113	213	358	1	1	-131	2	-154	1
113	214	616	1	1	127	1	16	2
113	215	489	2	1			111	1
113	216	600	3	1
113	217	495	1	1	6	2	-105	1
113	218	455	1	1	-7	2	-145	2
113	219	469	1	1	7	1	-28	3
113	220	462	2	1	71	1	35	2
113	221	533	1	1			36	1
113	222	497	3	1
113	223	423	1	1	-39	3	-81	1
113	224	504	3	1
113	225	392	3	1
113	226	457	3	1
113	227	474	2	1	-63	1	-17	1
113	228	411	1	1			-46	2
113	229	402	1	1	-58	2	-70	3
113	230	562	1	1	102	1	90	2
113	231	460	2	1			12	1
113	232	472	3	1
113	233	605	3	1
113	234	463	2	1	101	1	142	1
113	235	564	1	1	54	1	-41	2
113	236	510	2	1	5	1	4	2
113	237	515	1	1			1	1
113	238	514	3	1
113	239	523	1	1	13	3	169	1
113	240	354	3	1
114	114	506	1	1	69	2
114	115	409	1	1	-28	1	-161	5
114	116	437	2	1			133	4
114	117	406	2	1	42	1	164	3
114	118	448	1	1	11	1	-122	2
114	119	437	2	1			133	1
114	120	570	3	1
114	121	500	2	1	13	3	-39	1
114	122	461	3	1
114	123	420	3	1
114	124	513	1	1	-15	2	107	1
114	125	406	3	1
114	126	528	2	1	298	2	-122	1
114	127	539	2	1	287	1	-128	2
114	128	826	1	1			415	1
114	129	411	3	1
114	130	486	3	1
114	131	338	2	1	38	2	52	1
114	132	390	3	1
114	133	376	1	1			-103	1
114	134	479	3	1
114	135	742	1	1	244	4	349	1
114	136	393	3	1
114	137	326	3	1
114	138	525	3	1
114	139	498	2	1	-39	1	27	1
114	140	459	1	1	-52	1	53	2
114	141	511	2	1			-105	1
114	142	406	3	1
114	143	339	3	1
114	144	375	1	1	-136	3	-81	1
114	145	456	3	1
114	146	406	1	1	-41	2	-133	1
114	147	539	3	1
114	148	447	2	1			136	1
114	149	583	3	1
114	150	575	3	1
114	151	624	2	1	-180	2	-49	1
114	153	444	1	1	-47	2	-131	3
114	154	371	1	1	-120	1	-204	4
114	155	491	2	1			-18	4
114	156	554	2	1	-148	1	-81	3
114	157	406	1	1	-262	1	-67	2
114	158	668	2	1			-195	1
114	159	473	3	1
114	160	369	2	1	192	1	104	1
114	161	561	1	1			88	2
114	162	528	1	1	77	1	119	2
114	163	451	2	1			-42	1
114	164	409	3	1
114	165	341	2	1	57	1	68	1
114	166	398	1	1	-326	1	-11	2
114	167	724	2	1	-205	1	-315	3
114	168	519	1	1			155	3
114	169	523	1	1	131	1	159	2
114	170	392	2	1			-28	1
114	171	364	3	1
114	172	469	2	1	22	3	-105	1
114	173	472	2	1	19	2	62	1
114	174	534	3	1
114	175	491	1	1			-379	1
114	176	870	3	1
114	177	968	3	1
114	178	878	3	1
114	179	497	1	1	136	2	-381	1
114	180	402	1	1	41	1	24	2
114	181	361	2	1			17	1
114	182	378	3	1
114	183	383	2	1	6	3	79	1
114	184	462	3	1
114	185	416	3	1
114	186	389	1	1	-202	3	-27	1
114	187	791	1	1	200	2	375	2
114	188	558	1	1	-33	1	140	2
114	189	591	2	1			-173	1
114	190	418	3	1
114	191	537	3	1
114	193	556	2	1	-134	1	-19	2
114	194	422	1	1			62	2
114	195	472	1	1	-34	2	112	1
114	196	360	3	1
114	197	506	2	1	-51	1	-146	1
114	198	455	1	1			95	2
114	199	405	1	1	39	1	45	3
114	200	366	2	1			-6	4
114	201	422	2	1	-31	1	-62	5
114	202	391	1	1
114	203	332	1	1	-335	1
114	204	667	2	1
114	205	562	2	1	-178	1
114	206	384	1	1
114	207	755	1	1	306	1
114	208	449	2	1
114	209	437	2	1	387	2
114	210	443	2	1	381	1
114	211	824	1	1			327	5
114	212	430	1	1	-10	1	-67	4
114	213	440	2	1			57	3
114	214	581	2	1	-122	1	-84	2
114	215	459	1	1			-38	1
114	216	497	3	1
114	217	394	3	1
114	218	407	3	1
114	219	488	1	1	-105	1	81	1
114	220	593	2	1	25	1	-89	2
114	221	618	1	1			114	1
114	222	504	3	1
114	223	620	3	1
114	224	446	2	1	76	3	174	1
114	225	503	2	1	19	2	117	2
114	226	483	2	1	39	1	54	2
114	227	522	1	1			-15	1
114	228	537	3	1
114	229	687	1	1	228	2	42	1
114	230	645	3	1
114	231	459	2	1			-46	1
114	232	413	3	1
114	233	318	3	1
115	121	487	1	1	-43	2	-76	3
115	122	525	1	1	-5	1	-38	2
115	123	530	2	1			33	1
115	124	563	3	1
115	125	574	1	1	138	1	11	1
115	126	436	2	1			218	1
115	127	654	3	1
115	128	731	3	1
115	129	461	2	1	-86	2	270	1
115	130	422	2	1	-47	1	309	2
115	131	375	1	1	-291	1	-356	3
115	132	666	2	1	-196	1	-32	3
115	133	470	1	1	-103	1	-164	2
115	134	573	2	1			61	1
115	135	634	3	1
115	136	486	2	1	-16	3	148	1
115	137	477	2	1	-7	4	104	2
115	138	510	2	1	-40	5	71	1
115	139	581	3	1
115	140	614	3	1
115	141	700	3	1
115	142	590	2	1	-164	5	110	1
115	143	596	2	1	-170	4	104	2
115	144	623	2	1	-197	3	77	3
115	145	580	2	1	-154	2	120	4
115	146	578	2	1	-152	1	122	5
115	147	426	1	1			-120	5
115	148	479	1	1	-67	1	-67	4
115	149	546	2	1	13	1	0	3
115	150	559	1	1			13	2
115	152	546	3	1
115	153	435	3	1
115	154	637	1	1	115	2	209	1
115	155	428	3	1
115	156	522	2	1	-75	1	-94	1
115	157	447	1	1			-67	2
115	158	570	1	1	100	2	56	1
115	159	514	3	1
115	160	470	2	1			44	1
115	161	591	2	1	-21	3	64	2
115	162	478	2	1	117	3	177	1
115	163	655	3	1
115	164	497	3	1
115	165	595	1	1	138	1	98	1
115	166	457	2	1	-13	1	40	2
115	167	444	1	1	-57	1	-53	3
115	168	501	2	1	328	1	-4	4
115	169	829	1	1	-36	1	332	5
115	170	865	2	1	-35	1	-436	5
115	171	830	1	1			401	4
115	172	557	1	1	-308	2	128	3
115	173	585	1	1	-280	3	156	2
115	174	608	1	1	-257	4	179	1
115	175	429	3	1
115	176	530	1	1	-89	3	101	1
115	177	377	1	1	-242	2	-52	2
115	178	579	1	1	-40	1	17	2
115	179	619	2	1			-57	1
115	180	562	3	1
115	181	896	3	1
115	182	620	1	1	60	1	-276	1
115	183	560	2	1	18	1	111	2
115	184	578	1	1			-93	1
115	185	671	3	1
115	186	600	3	1
115	187	515	3	1
115	188	562	2	1	190	3	-47	1
115	189	531	2	1	221	2	-16	2
115	191	752	1	1	62	1	237	4
115	192	690	2	1			-24	4
115	193	407	2	1	88	2	259	3
115	194	595	2	1	-100	1	71	2
115	195	495	1	1			-171	1
115	196	666	3	1
115	197	549	3	1
115	198	392	2	1	121	3	64	1
115	199	456	3	1
115	200	486	3	1
115	201	513	1	1	-8	1	27	1
115	202	521	2	1			15	1
115	203	536	3	1
115	204	450	2	1	129	1	86	1
115	205	579	1	1	94	1	-329	2
115	206	485	2	1			423	1
115	207	908	3	1
115	208	633	1	1	148	2	-275	1
115	209	593	1	1	186	3	-90	1
115	210	683	3	1
115	212	407	2	1	56	1	276	2
115	213	463	1	1			-47	3
115	214	685	1	1	278	2	175	2
115	215	510	1	1	103	3	0	1
115	216	510	3	1
115	217	823	3	1
115	218	425	3	1
115	219	636	3	1
115	220	738	1	1	315	4	69	1
115	221	669	3	1
115	222	615	3	1
115	223	564	1	1	141	1	-51	1
115	224	423	2	1			178	1
115	225	601	3	1
115	226	631	1	1	206	1	30	1
115	227	425	2	1			243	1
115	228	668	3	1
115	229	477	3	1
115	230	660	1	1	-21	3	183	1
115	231	586	1	1	-95	2	109	2
115	232	469	1	1	-212	1	-8	3
115	233	681	2	1	-115	1	-147	3
115	234	566	1	1	102	1	32	2
115	235	464	2	1			70	1
115	236	534	3	1
115	237	658	3	1
115	238	522	2	1	-99	1	136	1
115	239	423	1	1			-235	2
116	120	473	3	1
116	121	460	3	1
116	122	425	3	1
116	123	513	3	1
116	124	375	1	1			-138	1
116	125	366	1	1	-65	5	-59	2
116	126	393	1	1	-38	4	-32	1
116	127	425	3	1
116	128	357	1	1	-74	2	-101	1
116	129	458	3	1
116	130	431	2	1	195	2	202	1
116	131	633	3	1
116	132	626	1	1	-143	1	-7	1
116	133	769	2	1			-136	2
116	134	577	2	1	-80	1	-59	3
116	135	497	1	1			-21	2
116	136	396	1	1	-276	2	-122	1
116	137	518	3	1
116	138	672	2	1	-246	2	-154	1
116	139	389	2	1	37	1	129	2
116	140	426	1	1	-150	1	-92	3
116	141	576	2	1			-116	3
116	142	508	2	1	-33	1	-48	2
116	143	475	1	1			15	1
116	144	460	3	1
116	145	425	1	1	-83	3	-180	1
116	146	605	3	1
116	147	567	3	1
116	148	459	1	1			-108	1
116	151	596	1	1	120	4	240	3
116	152	430	1	1	-46	3	74	2
116	153	474	1	1	-2	2	118	1
116	154	356	3	1
116	155	476	2	1	260	2	-120	1
116	156	410	2	1	326	1	93	2
116	157	736	1	1			233	1
116	158	503	3	1
116	159	337	2	1	54	1	166	1
116	160	391	1	1	-40	1	-112	2
116	161	431	2	1	-5	1	6	2
116	162	426	1	1			-11	1
116	163	437	3	1
116	164	492	2	1	-66	2	17	1
116	165	509	3	1
116	166	406	3	1
116	167	381	3	1
116	168	394	3	1
116	169	424	1	1	77	3	9	1
116	170	415	3	1
116	171	469	1	1	122	1	54	1
116	172	347	2	1			75	2
116	173	427	2	1	67	2	-5	1
116	174	422	3	1
116	175	494	1	1			-251	1
116	176	745	3	1
116	177	369	3	1
116	178	437	1	1	-12	1	68	1
116	179	449	2	1			133	1
116	180	582	3	1
116	181	583	2	1	-129	2	-161	1
116	182	422	3	1
116	183	454	1	1			32	1
116	184	362	1	1	-69	3	-145	1
116	185	507	3	1
116	186	540	1	1	109	1	33	1
116	187	431	2	1			31	1
116	188	462	3	1
116	189	643	2	1	-103	3	-181	1
116	190	625	2	1	-177	3	-94	1
116	191	531	3	1
116	192	540	2	1	-92	1	-9	1
116	193	448	1	1			-122	1
116	194	570	3	1
116	195	578	2	1	-130	2	-8	1
116	196	520	2	1	35	2	50	2
116	197	713	2	1	-158	1	-143	3
116	198	555	1	1			-15	4
116	199	464	1	1	-46	1	-106	5
116	200	510	2	1	-49	1
116	201	461	1	1	-76	1
116	202	537	2	1			-98	5
116	203	413	2	1	-39	1	26	4
116	204	374	1	1			-65	3
116	205	551	1	1	138	2	112	2
116	206	505	1	1	-37	2	66	1
116	207	439	3	1
116	208	542	2	1	276	2	127	1
116	209	669	3	1
116	210	818	1	1	101	1	149	1
116	211	717	2	1			-178	1
116	212	539	3	1
116	213	388	3	1
116	214	575	2	1	-12	1	-187	1
116	215	563	1	1			-215	2
116	216	444	1	1	-131	2	-334	1
116	217	778	3	1
116	219	418	2	1	-53	2	360	2
116	220	528	2	1	-163	1	250	3
116	221	365	1	1	-199	1	-2	4
116	222	564	2	1	-108	1	-197	3
116	223	456	1	1	-70	1	89	2
116	224	526	2	1			-159	1
116	225	367	3	1
116	226	553	2	1	-97	3	-186	1
116	227	485	2	1	-29	4	1	1
116	228	486	3	1
116	229	352	3	1
116	230	510	2	1	116	5	64	1
116	231	574	3	1
116	232	533	2	1	93	3	41	1
116	233	478	2	1	148	2	96	2
116	234	461	2	1	165	1	-16	3
116	235	626	1	1			181	2
116	236	423	1	1	-38	2	-22	1
116	237	445	3	1
116	238	616	3	1
116	239	459	1	1	-2	5	-157	1
117	121	355	1	1	52	1	76	4
117	122	303	2	1	-45	1	-24	3
117	123	258	1	1	0	1	-21	2
117	124	258	2	1			21	1
117	125	279	3	1
117	126	307	1	1	14	2	28	1
117	127	302	1	1	9	1	23	2
117	128	293	2	1	101	1	27	2
117	129	394	1	1			74	1
117	130	320	3	1
117	131	327	1	1	-3	1	7	1
117	132	330	2	1			-72	1
117	133	258	3	1
117	134	277	3	1
117	135	280	3	1
117	136	248	1	1	-24	1	-32	1
117	137	272	2	1	44	1	27	2
117	138	316	1	1			17	1
117	139	299	3	1
117	140	273	1	1	-5	1	-26	1
117	141	278	2	1			8	1
117	142	286	3	1
117	143	269	3	1
117	144	290	2	1	-17	4	-21	1
117	146	461	2	1			-179	1
117	147	282	3	1
117	148	282	3	1
117	149	324	2	1			-61	1
117	150	263	3	1
117	151	285	3	1
117	152	466	2	1	-144	3	-181	1
117	153	272	2	1	50	2	20	1
117	154	292	3	1
117	155	322	1	1			16	1
117	156	306	3	1
117	157	285	3	1
117	158	267	1	1	-53	3	-18	1
117	159	298	1	1	-22	2	13	2
117	160	252	1	1	-68	1	-33	3
117	161	320	2	1			-35	4
117	162	284	2	1	48	1	1	5
117	163	332	1	1
117	164	260	1	1	-63	2
117	165	404	1	1	81	1
117	166	323	2	1	-57	1	-44	5
117	167	266	1	1	-48	1	-13	4
117	168	314	2	1	63	1	-35	3
117	169	377	1	1	54	1	98	2
117	170	323	2	1			-44	1
117	171	279	3	1
117	172	336	3	1
117	173	371	1	1	48	3	35	1
117	174	293	1	1	-30	4	32	1
117	175	261	3	1
117	176	273	3	1
117	177	287	3	1
117	178	444	3	1
117	179	384	1	1	12	3	87	1
117	180	297	3	1
117	181	310	3	1
117	182	372	2	1	-81	3	-62	1
117	183	276	2	1	15	2	34	2
117	184	268	2	1	23	1	42	3
117	185	291	1	1	14	1	-19	4
117	186	277	2	1	86	1	33	5
117	187	363	1	1	48	1	84	5
117	188	315	2	1	-39	1	-36	4
117	189	276	1	1			-3	3
117	190	283	1	1	-32	2	4	2
117	191	317	1	1	-90	3	38	1
117	192	279	3	1
117	193	282	1	1	-125	1	3	1
117	194	407	2	1			-147	2
117	195	260	2	1	22	2	0	1
117	196	260	3	1
117	197	294	3	1
117	198	314	2	1	-52	3	-22	1
117	199	292	3	1
117	201	262	1	1	-21	3	-30	2
117	202	288	1	1	5	2	-1	3
117	203	297	1	1	14	1	8	2
117	204	283	2	1			6	1
117	205	289	3	1
117	206	251	3	1
117	207	262	1	1	3	1	11	1
117	208	259	2	1	18	1	-8	2
117	209	277	1	1	-16	1	20	2
117	210	293	2	1			-36	1
117	211	257	3	1
117	212	283	2	1	29	3	2	1
117	213	285	3	1
117	214	312	2	1	0	1	-27	1
117	215	312	1	1			43	1
117	216	269	3	1
117	217	228	3	1
117	218	294	2	1	195	3	-55	1
117	219	239	3	1
117	220	409	2	1	80	1	-170	1
117	221	489	1	1			250	2
117	222	335	1	1	-74	2	96	3
117	223	295	1	1	-35	3	-7	4
117	224	292	1	1	-38	2	-10	3
117	225	377	1	1	47	1	75	2
117	226	330	2	1			-28	1
117	227	302	3	1
117	228	324	2	1	53	3	-15	1
117	229	309	3	1
117	230	261	3	1
117	231	289	2	1	-17	2	-9	1
117	232	280	3	1
117	233	272	1	1	-11	1	-8	1
117	234	283	2	1			-3	2
117	235	309	2	1	-45	2	69	3
117	236	284	2	1	-20	1	94	2
117	237	264	1	1			-114	1
117	238	378	3	1
117	239	273	3	1
118	119	594	2	1	-229	1	-204	3
118	120	365	1	1			-25	2
118	121	660	1	1	66	2	270	1
118	122	390	3	1
118	123	668	3	1
118	124	695	2	1	-241	2	-65	1
118	125	630	3	1
118	126	454	1	1	-614	2	31	1
118	127	423	3	1
118	128	1068	2	1			-743	1
118	129	325	3	1
118	130	388	2	1	108	2	-63	1
118	131	530	2	1	-34	1	-205	2
118	132	496	1	1	134	1	171	3
118	133	362	2	1	78	1	50	3
118	134	440	1	1			28	2
118	135	365	1	1	3	2	-47	1
118	136	412	3	1
118	137	480	1	1	141	4	-82	1
118	138	562	3	1
118	139	452	3	1
118	140	461	3	1
118	141	339	2	1	202	3	183	1
118	142	522	3	1
118	143	541	3	1
118	144	541	1	1	133	1	0	1
118	145	408	2	1			133	2
118	146	385	2	1	232	2	399	3
118	147	346	2	1	271	1	438	2
118	148	617	1	1			-167	1
118	149	784	3	1
118	150	574	3	1
118	151	552	2	1	-46	2	48	1
118	152	600	3	1
118	153	506	1	1			-94	1
118	155	385	1	1	-381	2	-215	3
118	157	766	2	1			-335	3
118	158	448	2	1	-63	3	-17	2
118	159	331	2	1	54	4	100	1
118	160	431	3	1
118	161	689	3	1
118	162	372	2	1	6	3	317	1
118	163	428	2	1	-50	2	254	1
118	164	682	3	1
118	165	378	1	1	-159	2	-21	1
118	166	399	3	1
118	167	537	2	1			-138	1
118	168	589	2	1	-211	3	198	1
118	169	787	3	1
118	170	565	2	1	-187	5	222	1
118	171	453	2	1			170	2
118	172	560	2	1	50	5	63	1
118	173	623	3	1
118	174	878	2	1	-268	3	-468	1
118	175	410	3	1
118	176	520	2	1	90	1	-110	1
118	177	610	1	1			248	1
118	178	362	3	1
118	179	738	3	1
118	180	680	2	1	-362	3	54	1
118	181	734	3	1
118	182	699	2	1	-381	1	35	1
118	183	318	1	1			-354	2
118	185	672	3	1
118	186	585	2	1	-217	1	87	1
118	187	368	1	1			-304	2
118	188	602	1	1	24	2	-70	3
118	189	375	1	1	-203	1	-297	4
118	190	578	2	1			94	5
118	191	448	2	1	149	1
118	192	597	1	1	124	1
118	193	473	2	1
118	194	375	2	1	33	1	61	5
118	195	408	1	1	33	1	-28	4
118	196	375	2	1	700	1	61	3
118	197	1075	1	1	670	1	639	2
118	198	405	2	1			31	1
118	199	436	3	1
118	200	566	1	1	161	2	130	1
118	201	395	1	1	-63	3	-41	2
118	202	969	1	1	511	2	533	3
118	203	694	1	1	236	1	-92	3
118	204	458	2	1			328	2
118	205	627	2	1	67	2	159	1
118	206	786	3	1
118	207	426	2	1	268	4	360	1
118	208	584	2	1	110	5	90	1
118	209	674	3	1
118	210	1014	2	1	-391	4	-613	1
118	211	401	3	1
118	212	604	3	1
118	213	365	3	1
118	214	623	1	1	-78	1	258	1
118	215	701	2	1	-230	1	-336	2
118	216	471	1	1			106	3
118	217	791	1	1	90	2	-177	3
118	218	421	1	1	-280	3	-547	2
118	219	470	1	1	20	3	-498	1
118	220	968	3	1
118	221	670	1	1	220	1	-298	1
118	222	450	2	1			174	1
118	223	624	3	1
118	224	626	1	1	176	2	2	1
118	225	543	1	1	47	2	-81	2
118	227	496	2	1	-26	1	68	4
118	228	470	1	1			-94	3
118	229	560	1	1	64	2	-4	2
118	230	445	1	1	-51	3	-119	1
118	231	564	3	1
118	232	742	1	1	246	5	266	1
118	233	476	3	1
118	235	992	3	1
118	236	509	1	1			39	1
118	237	470	3	1
119	121	1155	1	1	657	3	418	1
119	122	737	3	1
119	123	771	1	1	273	1	34	1
119	124	498	2	1			239	2
119	125	575	2	1	196	2	162	3
119	126	488	2	1	44	2	155	3
119	127	765	2	1	-233	1	-122	2
119	128	532	1	1			-111	1
119	129	643	3	1
119	130	584	3	1
119	131	1129	3	1
119	132	545	1	1	-411	3	-71	1
119	133	616	3	1
119	134	620	3	1
119	135	956	2	1	45	1	-336	1
119	136	1001	1	1			203	1
119	137	798	3	1
119	138	770	2	1	-57	2	105	1
119	139	875	3	1
119	140	713	1	1			-24	1
119	141	737	3	1
119	142	813	1	1	37	1	76	1
119	143	776	2	1	166	1	-39	2
119	144	942	1	1			205	3
119	145	863	1	1	194	1	-85	3
119	146	669	2	1			279	2
119	147	871	2	1	-8	2	77	1
119	148	948	3	1
119	149	1030	3	1
119	150	805	2	1	367	3	-233	1
119	151	572	3	1
119	152	759	3	1
119	153	1172	1	1	440	3	441	1
119	154	731	3	1
119	155	762	1	1	30	1	31	1
119	156	732	2	1	-214	1	-69	2
119	157	518	1	1			-145	1
119	158	663	3	1
119	159	510	1	1	-306	1	-153	1
119	160	816	2	1	-21	1	-153	2
119	161	795	1	1			152	2
119	162	789	1	1	-144	2	146	1
119	163	643	3	1
119	164	933	2	1			-290	1
119	165	578	2	1	211	3	62	1
119	166	640	3	1
119	167	1157	3	1
119	168	603	2	1	218	4	554	1
119	169	862	2	1	-41	3	295	2
119	170	655	2	1	166	2	502	3
119	171	601	2	1	220	1	34	4
119	172	821	1	1	164	1	186	3
119	173	657	2	1	15	1	-22	2
119	174	672	1	1			37	1
119	175	635	3	1
119	176	616	3	1
119	177	769	2	1	-264	2	-235	1
119	178	534	3	1
119	179	505	1	1			-29	1
119	180	614	1	1	-155	3	80	2
119	181	701	1	1	168	4	3	2
119	182	560	1	1	27	3	-138	1
119	183	698	3	1
119	184	1175	1	1	642	1	477	1
119	185	533	2	1			165	2
119	186	556	2	1	38	1	38	3
119	187	594	1	1	-372	1	0	2
119	188	966	2	1			-372	1
119	189	594	3	1
119	190	773	2	1	-150	1	-179	1
119	191	623	1	1			-30	1
119	192	653	3	1
119	193	484	3	1
119	194	621	2	1	-169	1	-137	1
119	195	452	1	1			-504	2
119	196	597	1	1	-490	2	-359	1
119	197	956	3	1
119	198	1087	2	1	-391	2	-131	1
119	199	593	2	1	103	1	363	2
119	200	696	1	1	-178	1	-219	2
119	201	874	2	1			41	1
119	202	915	3	1
119	203	603	3	1
119	204	584	1	1	-288	1	-19	1
119	205	872	2	1			-241	1
119	206	631	3	1
119	207	733	2	1	18	1	-102	1
119	208	751	1	1	191	1	120	2
119	209	560	2	1			71	3
119	210	729	2	1	-164	1	-138	3
119	211	565	1	1			-26	2
119	212	765	1	1	36	2	174	1
119	213	591	3	1
119	214	597	1	1	5	3	6	1
119	215	771	1	1	179	2	179	1
119	216	592	3	1
119	217	592	2	1	145	1	0	1
119	218	737	1	1	-113	1	145	2
119	219	850	2	1			-272	3
119	220	1002	2	1	-265	2	-424	2
119	221	720	2	1	17	3	-142	1
119	222	578	3	1
119	223	606	2	1	-27	5	83	1
119	224	689	3	1
119	225	694	3	1
119	226	805	2	1	-226	2	-97	1
119	227	708	3	1
119	228	579	1	1			-129	1
119	229	735	1	1	-70	3	194	2
119	230	675	1	1	131	3	134	1
119	231	541	3	1
119	232	734	3	1
119	233	544	2	1	184	1	190	1
119	234	728	1	1			29	1
119	235	699	3	1
119	236	622	3	1
119	237	689	1	1	-425	1	67	1
119	238	1114	2	1			-661	1
119	239	453	3	1
119	240	630	1	1	-484	2	177	1
120	120	391	1	1	-92	2
120	121	330	1	1	-153	1
120	122	483	2	1	2	1
120	123	485	1	1
120	124	404	1	1	-100	1
120	125	504	2	1	-153	1
120	126	351	1	1			-57	5
120	127	497	1	1	-6	2	89	4
120	128	352	1	1	-151	1	-56	3
120	129	503	2	1			-95	2
120	130	490	2	1	-138	2	-82	1
120	131	408	3	1
120	132	385	3	1
120	133	538	2	1	-217	4	-153	1
120	134	359	2	1	-38	3	96	1
120	135	455	3	1
120	136	403	3	1
120	137	321	1	1	-112	1	-82	1
120	138	433	2	1			-30	2
120	139	370	2	1	57	2	33	3
120	140	338	2	1	89	1	65	4
120	141	427	1	1			24	5
120	142	449	1	1	111	2
120	143	425	1	1	55	3	6	5
120	144	524	1	1	154	2	105	4
120	145	383	1	1	13	1	-36	3
120	146	370	2	1			49	2
120	147	349	2	1	34	2	70	1
120	148	419	3	1
120	149	400	3	1
120	150	439	2	1	-127	3	9	1
120	151	448	3	1
120	152	406	2	1	-94	1	42	1
120	153	312	1	1			-136	2
120	154	417	1	1	24	1	-31	3
120	155	393	2	1			15	3
120	156	423	2	1	21	1	-15	2
120	157	444	1	1			36	1
120	158	408	3	1
120	159	383	2	1	-22	2	25	1
120	160	432	2	1	-71	1	-24	2
120	161	361	1	1	-51	1	-47	3
120	162	412	2	1			-32	4
120	163	467	2	1	-149	1	-87	3
120	164	318	1	1			-62	2
120	165	332	1	1	-101	2	-48	1
120	166	380	3	1
120	167	433	2	1	10	2	-1	1
120	168	432	3	1
120	169	443	1	1	71	1	11	1
120	170	372	2	1	81	1	60	2
120	171	453	1	1			47	3
120	172	373	1	1	1	2	-33	2
120	173	422	1	1	50	3	16	1
120	174	406	3	1
120	175	564	1	1	192	5	122	1
120	176	442	3	1
120	177	389	3	1
120	178	393	3	1
120	179	430	3	1
120	180	434	3	1
120	181	424	3	1
120	182	505	2	1	-137	1	-81	1
120	183	368	1	1			41	1
120	184	327	3	1
120	185	417	3	1
120	186	435	2	1	-18	1	-18	1
120	187	417	1	1			0	2
120	188	323	1	1	-19	2	-94	3
120	189	378	1	1	36	1	-39	4
120	190	342	2	1			51	4
120	191	409	2	1	-42	2	-16	3
120	192	425	2	1	-58	1	-32	2
120	193	367	1	1			-26	1
120	194	393	3	1
120	195	437	1	1	36	2	121	1
120	196	316	3	1
120	197	401	2	1	-82	1	-85	1
120	198	319	1	1			-37	1
120	199	356	3	1
120	200	343	1	1	-11	3	-18	1
120	201	361	3	1
120	202	408	3	1
120	203	354	2	1	-23	3	54	1
120	204	393	2	1	-62	2	15	2
120	205	594	2	1	-263	1	-186	3
120	206	331	1	1			-29	3
120	207	438	1	1	87	1	78	2
120	208	351	2	1			9	1
120	209	360	3	1
120	210	383	1	1	32	2	23	1
120	211	430	1	1	105	2	70	2
120	212	512	1	1	187	1	-61	2
120	213	325	2	1			248	1
120	214	573	3	1
120	216	404	3	1
120	217	431	2	1	-88	1	-27	1
120	218	343	1	1			-11	1
120	219	354	3	1
120	220	455	3	1
120	221	425	3	1
120	222	353	3	1
120	223	370	3	1
120	224	373	1	1	-158	4	-9	1
120	225	382	3	1
120	226	408	3	1
120	227	435	1	1	-96	1	27	1
120	228	531	2	1			-206	1
120	229	325	3	1
120	230	393	2	1	42	3	-68	1
120	231	343	2	1	92	4	9	1
120	232	352	3	1
120	233	398	2	1			-46	1
120	234	334	2	1			23	1
120	235	357	3	1
120	236	419	2	1			-33	1
120	237	386	3	1
120	238	476	2	1			-97	1
120	239	379	3	1
121	118	619	1	1	49	2	179	1
121	119	440	3	1
121	120	570	2	1			-136	1
121	121	434	3	1
121	122	472	3	1
121	123	467	1	1	-281	1	-5	1
121	124	748	2	1	-97	1	-276	2
121	125	651	1	1			179	3
121	126	711	1	1	286	1	180	3
121	127	425	2	1			106	2
121	128	524	2	1	187	2	7	1
121	129	531	3	1
121	130	428	2	1	160	1	103	1
121	131	588	1	1			41	1
121	132	547	3	1
121	133	497	3	1
121	134	538	1	1	20	1	41	1
121	135	518	2	1			-136	1
121	136	382	3	1
121	137	568	1	1	98	1	186	1
121	138	470	2	1			-13	2
121	139	469	2	1	99	2	-12	1
121	140	457	3	1
121	141	656	2	1	49	3	-161	1
121	142	495	3	1
121	143	650	3	1
121	144	705	1	1	216	1	55	1
121	145	489	2	1			42	1
121	146	531	3	1
121	147	476	2	1	229	3	55	1
121	148	571	2	1	21	4	138	1
121	149	709	3	1
121	150	475	2	1	117	2	234	1
121	151	453	2	1	139	1	256	2
121	152	592	1	1	143	1	-117	3
121	153	449	2	1			260	4
121	154	494	2	1	-109	1	215	5
121	155	385	1	1	-129	1	-323	5
121	156	514	2	1			194	4
121	157	665	2	1	5	2	43	3
121	158	485	2	1	185	1	223	2
121	159	670	1	1			-38	1
121	160	708	3	1
121	161	484	2	1	-26	1	224	1
121	162	458	1	1			-135	1
121	163	593	3	1
121	164	751	1	1	131	2	216	1
121	165	535	3	1
121	166	620	2	1			-85	1
121	167	436	2	1	275	3	18	2
121	168	468	2	1	243	2	-14	1
121	169	454	3	1
121	170	711	1	1	283	1	257	1
121	171	428	2	1	176	1	26	2
121	172	604	1	1			217	2
121	173	441	1	1	13	2	54	1
121	174	387	3	1
121	175	477	1	1	49	4	90	1
121	177	730	1	1	265	4	393	1
121	178	337	3	1
121	179	446	1	1	-19	2	109	1
121	180	871	1	1	406	1	534	2
121	181	465	2	1	28	1	-128	3
121	182	493	1	1	-21	1	-162	3
121	183	514	2	1	45	1	141	2
121	184	559	1	1			-96	1
121	185	655	3	1
121	186	494	2	1	54	1	161	1
121	187	548	1	1			90	1
121	188	458	3	1
121	189	346	2	1	202	2	119	1
121	190	465	3	1
121	191	872	2	1	-279	3	-407	1
121	192	665	2	1	-72	2	-43	1
121	193	622	3	1
121	194	593	1	1			224	1
121	195	369	3	1
121	196	967	1	1	428	1	598	1
121	197	539	2	1			-42	1
121	198	497	3	1
121	199	443	1	1	-96	2	-62	1
121	200	505	3	1
121	201	587	1	1	-71	3	-1	1
121	202	588	3	1
121	203	691	1	1	33	1	103	1
121	204	658	2	1	-63	1	-142	2
121	205	595	1	1			79	1
121	206	516	3	1
121	207	567	3	1
121	208	482	2	1	18	2	229	1
121	209	711	3	1
121	210	500	1	1			-64	1
121	211	564	3	1
121	212	444	1	1	-170	1	-120	1
121	213	614	2	1			-111	1
121	214	503	3	1
121	215	521	3	1
121	216	558	2	1	-114	4	55	1
121	217	613	3	1
121	218	489	2	1	123	4	124	1
121	219	493	2	1	119	3	181	2
121	220	475	2	1	137	2	199	1
121	221	674	3	1
121	222	612	1	1	108	2	-62	1
121	223	724	1	1	220	1	50	2
121	224	504	2	1			103	2
121	225	540	2	1	-33	2	67	1
121	226	607	3	1
121	227	507	1	1			-100	1
121	228	544	1	1	4	3	17	1
121	229	527	3	1
121	230	453	1	1	-87	5	-74	1
121	231	617	1	1			130	1
121	232	487	3	1
121	233	607	3	1
121	234	786	1	1			191	1
121	235	595	3	1
122	120	446	3	1
122	121	361	2	1	34	1	85	1
122	122	395	1	1			23	2
122	123	349	1	1	-12	2	-23	1
122	124	372	3	1
122	125	334	3	1
122	126	362	1	1	32	2	28	1
122	127	350	1	1	20	1	16	2
122	128	330	2	1			4	3
122	129	548	2	1	-195	2	-214	4
122	130	283	2	1	70	1	274	4
122	131	353	1	1			-204	3
122	132	312	1	1	-106	1	-245	2
122	133	418	2	1			139	1
122	134	557	3	1
122	135	290	3	1
122	136	342	3	1
122	137	322	1	1	-45	2	-36	1
122	138	358	3	1
122	139	367	2	1			-9	1
122	140	319	2	1	3	3	39	2
122	141	355	2	1	22	3	3	3
122	142	454	2	1	-77	2	-96	4
122	143	376	2	1	1	1	-18	5
122	144	377	1	1
122	145	362	1	1	-14	2	23	5
122	146	409	1	1	67	3	70	4
122	147	278	1	1	-64	2	-61	3
122	148	293	1	1	-49	1	-46	2
122	149	342	2	1			-3	1
122	150	339	3	1
122	151	286	3	1
122	152	407	3	1
122	153	282	1	1	-57	2	-98	1
122	154	380	3	1
122	155	339	2	1			41	1
122	156	337	2	1	12	2	43	2
122	157	280	2	1	69	1	100	3
122	158	349	1	1	69	1	-31	4
122	159	280	2	1	26	1	100	5
122	160	306	1	1	-19	1	-48	5
122	161	325	2	1			29	4
122	162	305	2	1	1	2	49	3
122	163	324	2	1	-18	3	30	2
122	164	255	2	1	51	2	99	1
122	165	354	3	1
122	166	306	1	1	-104	2	-48	1
122	167	334	1	1	-76	1	-20	2
122	168	410	2	1	42	1	-56	3
122	169	452	1	1	147	1	93	3
122	170	305	2	1			54	2
122	171	306	2	1	10	2	53	1
122	172	359	3	1
122	173	316	1	1			12	1
122	174	304	3	1
122	175	377	1	1	134	1	73	1
122	176	243	2	1			61	2
122	177	311	2	1	96	1	12	2
122	178	407	1	1			84	1
122	179	323	3	1
122	180	303	3	1
122	181	582	1	1	271	4	276	1
122	182	306	3	1
122	183	329	3	1
122	185	318	1	1	-3	4	-143	1
122	186	461	3	1
122	187	276	3	1
122	188	272	1	1	-49	1	-4	1
122	189	321	2	1			-44	1
122	190	277	3	1
122	191	366	2	1	-20	1	-89	1
122	192	346	1	1			69	2
122	193	300	1	1	-66	2	23	3
122	194	323	1	1	8	2	46	4
122	195	309	1	1	-6	1	-154	5
122	196	315	2	1			148	4
122	197	270	2	1	42	2	193	3
122	198	383	2	1	-71	1	80	2
122	199	312	1	1			-151	1
122	200	463	3	1
122	202	271	3	1
122	203	370	2	1	-58	4	11	1
122	204	381	3	1
122	205	282	2	1	67	3	28	1
122	206	310	3	1
122	207	327	2	1	22	1	-17	1
122	208	349	1	1			-45	1
122	209	394	3	1
122	210	486	1	1	159	3	191	1
122	211	295	3	1
122	212	371	3	1
122	213	317	3	1
122	214	335	2	1	151	4	-18	1
122	215	321	2	1	-58	4	-21	2
122	216	315	2	1	-52	3	-15	1
122	217	300	3	1
122	218	312	3	1
122	219	263	1	1			-55	1
122	220	318	3	1
122	221	356	1	1	41	5	38	1
122	222	320	1	1			2	2
122	223	402	1	1	-187	5	8	2
122	224	342	1	1	-247	4	-52	1
122	225	394	3	1
122	226	468	3	1
122	227	333	3	1
122	228	589	2	1	-231	1	-256	1
122	229	358	1	1			25	2
122	230	327	1	1	-32	1	51	2
122	231	359	2	1			-83	1
122	232	276	3	1
122	233	262	3	1
122	234	360	3	1
122	235	346	2	1	-19	5	-10	1
122	236	336	3	1
122	237	392	2	1			53	1
122	238	445	3	1
123	120	338	2	1	44	3	27	2
123	121	374	2	1	8	2	-9	1
123	122	365	3	1
123	123	382	1	1	52	2	17	1
123	124	396	1	1	66	1	31	2
123	125	330	2	1	248	1	55	3
123	126	578	1	1	172	1	193	2
123	127	406	2	1			-21	1
123	128	385	3	1
123	129	325	1	1	-81	2	-60	1
123	130	421	1	1	15	3	-93	1
123	131	514	3	1
123	132	353	3	1
123	133	338	1	1	-191	5	-21	1
123	134	359	3	1
123	135	399	3	1
123	136	440	1	1	-89	2	37	1
123	137	403	3	1
123	138	529	2	1	-77	2	-126	1
123	139	347	2	1	105	1	56	2
123	140	452	1	1	28	1	49	3
123	141	424	2	1			-21	4
123	142	354	2	1	98	2	49	5
123	143	511	2	1	-174	2
123	144	310	2	1	27	1	380	5
123	145	337	1	1	-72	1	-353	4
123	146	409	2	1	23	1	281	3
123	147	432	1	1	101	1	-258	2
123	148	331	2	1			359	1
123	149	690	3	1
123	150	404	1	1	73	2	-286	1
123	151	448	1	1	102	3	-39	2
123	152	451	1	1	105	2	-36	1
123	153	487	3	1
123	154	346	2	1	12	1	141	1
123	155	358	1	1			-29	1
123	156	387	3	1
123	157	382	2	1	-24	2	5	1
123	158	443	2	1	-85	3	-113	1
123	159	330	3	1
123	160	350	3	1
123	161	302	2	1	87	2	133	1
123	162	435	3	1
123	163	389	1	1			-46	1
123	164	356	1	1	55	3	67	2
123	165	376	1	1	75	2	87	1
123	166	289	3	1
123	167	301	2	1	31	2	26	1
123	168	327	3	1
123	169	332	1	1	-144	2	-95	1
123	170	427	3	1
123	171	476	2	1	-116	1	-49	1
123	172	360	1	1			-67	2
123	173	320	1	1	-156	2	-107	3
123	174	361	1	1	17	2	-84	4
123	175	361	1	1	17	1	-84	3
123	176	344	2	1			101	2
123	177	331	2	1	61	2	114	1
123	178	445	3	1
123	179	392	1	1			-53	1
123	180	429	1	1	17	3	-47	1
123	181	476	3	1
123	182	383	3	1
123	183	412	2	1	-73	1	-29	1
123	184	339	1	1			-20	1
123	185	359	3	1
123	186	635	2	1	-296	2	-299	1
123	187	336	3	1
123	188	351	2	1	6	1	-15	1
123	189	357	1	1			25	1
123	190	332	3	1
123	191	628	3	1
123	192	373	2	1	-27	1	255	1
123	193	346	1	1			-282	2
123	194	370	1	1	-3	2	54	2
123	195	335	1	1	40	3	19	1
123	196	316	3	1
123	197	312	1	1	17	1	-4	1
123	198	295	2	1			21	2
123	199	325	2	1	-6	1	-49	3
123	200	319	1	1	-43	1	43	2
123	201	362	2	1			-86	1
123	202	276	3	1
123	203	495	1	1	125	1	219	1
123	204	370	2	1			-18	1
123	205	352	3	1
123	206	276	1	1	-3	2	-212	1
123	207	488	3	1
123	208	279	2	1			143	1
123	209	422	3	1
123	210	427	3	1
123	211	375	1	1	40	1	-52	1
123	212	335	2	1			92	2
123	213	417	2	1	-42	2	-2	2
123	214	457	2	1	31	2	-42	1
123	215	415	3	1
123	216	488	1	1			29	1
123	217	459	3	1
123	218	312	3	1
123	219	302	3	1
123	220	505	3	1
123	221	497	2	1	-125	3	8	1
123	222	374	2	1	-2	2	111	1
123	223	485	3	1
123	224	372	1	1	6	2	49	1
123	225	323	3	1
123	226	366	2	1	-8	1	-43	1
123	227	358	1	1			35	2
123	228	403	1	1	98	1	-10	2
123	229	305	2	1			108	1
123	230	413	3	1
123	231	279	3	1
123	232	345	1	1	-29	2	-65	1
123	233	410	3	1
123	234	374	2	1	-66	1	36	1
123	235	308	1	1			-75	1
123	236	383	3	1
124	121	393	2	1	164	4	-35	1
124	122	358	3	1
124	123	526	2	1	31	2	-193	1
124	124	333	3	1
124	125	557	1	1	189	1	224	1
124	126	368	2	1			197	1
124	127	565	3	1
124	128	552	1	1	101	1	-13	1
124	129	451	2	1			-95	2
124	130	467	2	1	85	2	-111	1
124	131	356	3	1
124	132	553	3	1
124	133	382	1	1	-44	1	-171	1
124	134	426	2	1	-9	1	127	2
124	135	417	1	1			-136	3
124	136	476	1	1	50	2	-77	4
124	137	461	1	1	35	3	113	4
124	138	430	1	1	55	4	82	3
124	139	516	1	1	141	3	168	2
124	140	373	1	1	-2	2	25	1
124	141	348	3	1
124	142	375	2	1	-34	2	-27	1
124	143	416	2	1	-75	1	-68	2
124	144	341	1	1	-58	1	-10	2
124	145	399	2	1			-48	1
124	146	351	3	1
124	147	358	3	1
124	148	429	3	1
124	149	368	1	1	9	3	-53	1
124	150	421	3	1
124	151	450	3	1
124	152	359	2	1			91	1
124	153	427	2	1	49	4	23	2
124	154	445	2	1	31	3	-45	2
124	155	399	2	1	77	2	1	1
124	156	400	3	1
124	157	476	1	1	41	2	27	1
124	158	449	3	1
124	159	435	2	1			-22	1
124	160	413	3	1
124	161	410	2	1	-112	1	3	1
124	162	298	1	1	-60	1	-115	2
124	163	358	2	1	120	1	183	2
124	164	478	1	1			-63	1
124	165	541	3	1
124	166	469	1	1	7	3	-72	1
124	167	433	1	1	-29	2	87	1
124	168	346	3	1
124	169	462	2	1	76	2	78	1
124	170	540	3	1
124	171	538	1	1	221	1	-2	1
124	172	317	2	1			128	1
124	173	445	3	1
124	174	432	1	1	115	2	34	1
124	175	398	3	1
124	176	516	1	1	61	1	118	1
124	177	455	2	1	34	1	-57	2
124	178	489	1	1	62	1	91	3
124	179	427	2	1			81	4
124	180	570	2	1	-109	1	-62	3
124	181	461	1	1	109	1	-47	2
124	182	352	2	1			156	1
124	183	508	3	1
124	184	379	2	1	-26	1	129	1
124	185	353	1	1	-169	1	9	2
124	186	522	2	1			-178	1
124	187	344	3	1
124	188	480	2	1	28	1	-136	1
124	189	508	1	1			81	1
124	190	427	3	1
124	191	360	1	1	-120	3	-24	1
124	192	384	3	1
124	193	397	3	1
124	194	438	1	1	-2	2	41	1
124	195	393	1	1	-47	1	-4	2
124	196	440	2	1	116	1	-43	3
124	197	556	1	1	-64	1	159	4
124	198	620	2	1	-186	1	-133	5
124	199	434	1	1	-160	1	-53	4
124	200	594	2	1			-107	3
124	201	428	2	1	-2	1	59	2
124	202	426	1	1			-61	1
124	203	487	3	1
124	204	453	1	1	-245	2	80	1
124	205	373	3	1
124	206	698	2	1	-295	1	-325	1
124	207	403	1	1			-10	1
124	208	413	3	1
124	209	531	3	1
124	210	526	1	1	121	4	56	1
124	211	470	3	1
124	212	528	1	1	123	2	58	1
124	213	419	1	1	14	1	-51	2
124	214	405	2	1	204	1	103	2
124	215	609	1	1			101	1
124	216	508	3	1
124	217	466	2	1	143	2	53	1
124	218	519	3	1
124	219	655	2	1	-222	2	-136	1
124	220	474	2	1	-41	1	45	2
124	221	433	1	1			19	3
124	223	415	2	1	18	2	-1	1
124	224	414	3	1
124	225	580	2	1	-201	1	-166	1
124	226	379	1	1			-90	1
124	227	469	3	1
124	228	499	3	1
124	229	402	3	1
124	231	375	2	1	-35	1	27	2
124	232	340	1	1	-35	1	-70	3
124	233	375	2	1			35	2
124	234	468	2	1	-128	2	-58	1
124	235	410	3	1
124	236	421	3	1
124	237	519	2	1	-179	5	-23	1
124	238	496	3	1
124	239	402	3	1
211	239	373	2	1	-15	4	-59	1
211	240	314	3	1
211	241	257	3	1
211	242	264	2	1	94	1	-7	1
211	243	358	1	1			97	2
211	244	292	1	1	-350	2	31	1
211	245	261	3	1
211	246	642	2	1			-381	1
211	247	387	2	1	-95	3	-27	1
211	248	360	3	1
211	249	352	3	1
211	250	312	3	1
211	251	263	2	1	172	2	118	1
211	252	381	3	1
211	253	435	1	1	129	2	169	1
211	254	266	3	1
211	255	306	2	1	254	1	-40	1
211	256	560	1	1	82	1	142	2
211	257	478	2	1			-60	1
211	258	418	3	1
211	259	311	3	1
211	260	279	2	1	1	2	32	1
211	261	307	2	1	-27	1	-55	2
211	262	280	1	1			28	1
211	263	252	3	1
211	264	252	3	1
211	265	287	1	1	-231	3	35	1
211	266	276	1	1	-242	2	-111	1
211	267	387	3	1
211	268	518	2	1	-191	1	-131	1
211	269	327	1	1			-60	2
211	270	261	1	1	-15	2	-126	3
211	271	279	1	1	3	1	47	3
211	272	276	2	1	61	1	-44	2
211	273	337	1	1			105	1
211	274	232	3	1
211	275	255	3	1
211	276	299	2	1	-21	1	-44	1
211	277	278	1	1			23	2
211	278	294	1	1	20	2	39	3
211	279	278	1	1	4	1	23	4
211	280	274	2	1	319	1	24	4
211	281	593	1	1			295	3
211	282	307	1	1	-13	1	9	2
211	283	320	2	1			-22	1
211	284	298	3	1
211	285	272	3	1
211	286	428	1	1	140	1	156	1
211	287	288	2	1	68	1	-16	2
211	288	356	1	1	99	1	84	3
211	289	257	2	1	11	1	15	4
211	290	268	1	1	-172	1	-4	5
211	291	440	2	1			-20	5
211	292	290	2	1	-5	1	130	4
211	293	285	1	1			-135	3
211	294	342	1	1	52	2	-78	2
211	295	286	1	1	-54	2	-134	1
211	296	420	3	1
211	297	340	2	1			-91	1
211	298	249	3	1
211	299	255	3	1
211	300	382	1	1	111	2	121	1
211	301	261	3	1
211	302	271	2	1	96	2	-14	1
211	303	257	3	1
211	304	367	1	1			90	1
211	305	277	3	1
211	306	278	1	1	54	2	30	1
211	307	248	3	1
211	308	224	2	1	26	2	59	1
211	309	283	3	1
211	310	250	1	1	-104	2	-33	1
211	311	222	1	1	-132	1	-61	2
211	312	354	2	1	-43	1	-103	2
211	313	311	1	1			60	1
211	314	251	3	1
211	315	228	2	1	99	2	190	1
211	316	418	3	1
211	317	327	1	1			-85	1
211	318	412	3	1
211	319	336	3	1
211	320	251	2	1	21	3	85	1
211	321	486	2	1	-214	2	-150	2
211	323	272	1	1	25	1	-64	4
211	324	247	2	1			89	5
211	325	261	2	1	29	1
211	326	290	1	1			-159	5
211	327	276	1	1	-11	1	-173	4
211	328	287	2	1	40	1	162	3
211	329	327	1	1	24	1	-122	2
211	330	303	2	1			146	1
211	331	449	3	1
211	332	309	3	1
211	333	305	2	1	-30	3	4	1
211	334	354	2	1	-79	2	-58	1
211	335	296	3	1
211	336	275	1	1	-12	2	-158	1
211	337	433	3	1
211	338	287	2	1	42	1	146	1
211	339	329	1	1			-37	2
211	340	298	1	1	27	2	-68	1
211	341	366	3	1
211	342	271	2	1			95	1
211	344	306	3	1
211	345	467	3	1
211	346	625	2	1	-139	3	-158	1
211	347	275	2	1	211	2	82	1
211	348	357	3	1
211	349	486	1	1			129	1
211	350	324	1	1	60	2	-33	2
211	352	264	2	1			57	2
211	353	431	2	1	-107	3	-110	1
211	354	321	3	1
211	355	283	2	1	41	5	-38	1
211	356	245	3	1
211	357	287	3	1
211	358	328	2	1			-41	1
212	240	674	2	1	-209	2	-339	4
212	241	446	2	1	19	1	-111	3
212	242	465	1	1	114	1	130	2
212	243	351	2	1			-16	1
212	244	335	3	1
212	245	427	3	1
212	246	382	3	1
212	247	329	1	1	11	1	-53	1
212	248	318	2	1			-31	1
212	249	287	3	1
212	250	394	3	1
212	251	498	3	1
212	252	401	3	1
212	253	496	2	1	-125	1	-95	1
212	254	371	1	1			-30	2
212	255	354	1	1	-31	1	-135	3
212	256	385	2	1	-17	1	104	2
212	257	368	1	1			-121	1
212	258	489	3	1
212	259	430	2	1	31	2	28	1
212	260	458	3	1
212	261	461	1	1	45	1	3	1
212	262	416	2	1			42	2
212	263	544	2	1	-117	1	-169	3
212	264	427	1	1			52	2
212	265	326	1	1	-218	2	-49	1
212	266	375	3	1
212	267	490	3	1
212	268	466	1	1	125	4	-8	1
212	269	474	3	1
212	270	522	1	1	181	2	48	1
212	271	343	1	1	2	1	-131	2
212	272	341	2	1	30	1	21	2
212	273	371	1	1			9	1
212	274	362	3	1
212	275	403	1	1	26	1	41	1
212	276	377	2	1			-124	1
212	277	253	3	1
212	278	517	3	1
212	279	350	2	1	139	1	167	1
212	280	489	1	1	98	1	-28	2
212	281	391	2	1	19	1	-6	2
212	282	410	1	1			25	1
212	283	385	3	1
212	284	351	2	1	59	2	34	1
212	285	412	2	1	-2	3	-42	1
212	286	370	3	1
212	287	440	2	1	-30	5	-70	1
212	288	501	2	1			242	1
212	289	743	3	1
212	290	282	2	1	42	5	461	1
212	291	527	2	1	-203	4	-228	2
212	292	458	2	1	-134	3	-159	1
212	293	299	3	1
212	294	520	2	1	-196	1	-221	1
212	295	324	1	1	-24	1	25	2
212	296	348	2	1	0	1	-49	3
212	297	348	1	1	-189	1	-32	3
212	298	537	2	1	-140	1	-157	2
212	299	397	1	1			17	1
212	300	380	3	1
212	301	404	2	1	71	2	-88	1
212	302	316	3	1
212	303	475	1	1	60	1	159	1
212	304	415	2	1	-120	1	-99	2
212	305	295	1	1			-139	3
212	306	412	1	1	-51	1	-22	2
212	307	463	2	1			-29	1
212	308	434	3	1
212	309	318	3	1
212	310	528	1	1	129	1	210	1
212	311	399	2	1			-101	1
212	312	298	3	1
212	313	353	1	1	-131	2	55	1
212	314	321	1	1	-163	1	23	2
212	315	484	2	1			-186	3
212	316	675	2	1	-354	2	-351	4
212	317	256	2	1	139	2	68	3
212	318	418	2	1	-23	1	-94	2
212	319	395	1	1			71	1
212	320	324	3	1
212	321	354	2	1	68	2	-30	1
212	322	317	2	1	105	1	7	2
212	323	422	1	1			88	2
212	324	294	1	1	-23	2	-40	1
212	325	334	3	1
212	326	438	3	1
212	327	369	3	1
212	328	410	2	1	22	2	-25	1
212	329	385	3	1
212	330	432	1	1	57	1	47	1
212	331	375	2	1	23	1	10	2
212	332	398	1	1	16	1	106	3
212	333	382	2	1	-4	1	-90	2
212	334	378	1	1			86	1
212	335	292	3	1
212	336	401	1	1	19	3	-97	1
212	337	498	3	1
212	338	355	3	1
212	339	316	1	1	44	3	-13	1
212	340	329	3	1
212	341	433	3	1
212	342	272	2	1	116	3	28	1
212	343	300	3	1
212	344	444	2	1	-56	1	-144	1
212	345	388	1	1			91	1
212	346	297	3	1
212	347	511	2	1	-210	1	-214	1
212	348	301	1	1			-124	1
212	349	425	3	1
212	350	449	3	1
212	352	415	3	1
212	353	378	1	1	24	4	-37	1
212	354	388	1	1	34	3	-27	2
212	355	469	1	1	115	2	54	3
212	356	479	1	1	125	1	64	4
212	357	354	2	1	15	1	61	5
212	358	369	1	1
213	240	385	3	1
213	241	625	3	1
213	242	574	1	1	6	3	273	1
213	243	301	3	1
213	244	465	3	1
213	245	568	2	1	-38	1	-103	1
213	246	530	1	1	12	1	-72	2
213	247	518	2	1			84	1
213	248	602	3	1
213	249	653	3	1
213	250	1004	2	1	-419	3	-658	1
213	251	346	3	1
213	252	677	3	1
213	253	585	1	1	125	3	77	1
213	254	508	3	1
213	255	572	3	1
213	256	460	2	1			112	1
213	257	380	2	1	205	4	164	2
213	258	670	2	1	-35	4	-126	1
213	259	544	3	1
213	260	581	3	1
213	261	828	3	1
213	262	635	1	1			-193	1
213	263	437	1	1	-197	4	-391	2
213	264	607	1	1	-27	3	-105	2
213	265	778	1	1	144	2	66	1
213	266	712	3	1
213	267	634	2	1			78	1
213	268	686	2	1	-141	2	-294	1
213	269	392	3	1
213	270	545	1	1	29	1	153	1
213	271	516	2	1	-163	1	14	2
213	272	353	1	1			-177	1
213	273	530	3	1
213	274	780	1	1	-198	2	136	1
213	275	644	3	1
213	276	978	2	1	-616	1	-334	1
213	277	362	1	1	-287	1	-282	2
213	278	649	2	1	-38	1	-5	3
213	279	611	1	1			-33	4
213	280	646	1	1	-59	2	64	4
213	281	696	1	1	-9	1	114	3
213	282	705	2	1			-123	2
213	283	435	2	1	285	2	147	1
213	284	582	3	1
213	285	720	1	1	297	1	138	1
213	286	423	2	1	-77	1	159	2
213	287	346	1	1			50	2
213	288	692	1	1	269	2	396	1
213	289	296	3	1
213	290	612	1	1	189	4	43	1
213	291	569	3	1
213	292	495	3	1
213	293	629	3	1
213	294	628	3	1
213	295	690	2	1	-313	2	-62	1
213	296	889	2	1	-512	1	-261	2
213	297	377	1	1			-251	3
213	298	673	1	1	-18	2	45	4
213	299	807	1	1	116	1	179	5
213	300	691	2	1
213	301	530	2	1	157	1
213	302	687	1	1
213	303	813	1	1	441	1
213	304	372	2	1			335	5
213	305	309	2	1	144	1	398	4
213	306	453	1	1	102	1	-254	3
213	307	351	2	1	46	1	356	2
213	308	397	1	1			-310	1
213	309	707	3	1
213	310	416	1	1	23	2	-291	1
213	311	549	1	1	156	1	-158	2
213	312	393	2	1			314	3
213	313	402	2	1	147	2	367	3
213	314	557	2	1	623	3	212	2
213	315	355	2	1	825	2	414	1
213	316	769	3	1
213	317	1180	1	1			411	1
213	318	422	1	1	-80	3	-355	2
213	319	451	1	1	-51	2	-326	1
213	320	777	3	1
213	321	502	2	1	-164	1	275	1
213	322	338	1	1	-98	1	-439	2
213	323	436	2	1	-86	1	273	2
213	324	350	1	1			-359	1
213	325	709	3	1
213	326	374	2	1	-24	2	104	1
213	327	478	3	1
213	328	476	2	1	-35	3	15	1
213	329	491	3	1
213	330	315	2	1	126	1	176	1
213	331	441	1	1			-446	1
213	332	887	3	1
213	333	695	2	1	-228	2	192	1
213	334	586	2	1	-119	1	301	2
213	335	467	1	1			14	3
213	336	542	1	1	-44	2	89	2
213	337	635	1	1	143	3	182	1
213	338	453	3	1
213	339	433	1	1	-59	1	-20	1
213	340	492	2	1			-123	1
213	341	369	3	1
213	342	403	3	1
213	343	479	3	1
213	344	344	3	1
213	345	728	3	1
213	346	362	2	1	-8	2	366	1
213	347	380	2	1	-26	1	348	2
213	348	354	1	1	-232	1	-185	3
213	349	586	2	1			-47	2
213	350	644	2	1	30	2	-105	1
213	351	539	3	1
213	352	674	1	1	193	2	135	1
213	353	641	1	1	160	1	172	2
213	354	481	2	1			-12	1
213	355	469	3	1
213	356	547	2	1	94	3	35	1
213	357	582	3	1
213	358	552	2	1	89	5	30	1
215	240	378	3	1
215	241	340	2	1			65	1
[truncated: 7,969 more rows]
