# Supplementary material for: Food Palatability Directs Our Eyes Across Contexts
Source: Frontiers journal article supplement (doi:10.3389/fpsyg.2021.664893), 2021-05-31
Supplement: Data_Sheet_1.zip [file HedonicOutput_TLBSParamsFood_S1.xlsx]

## Sheet: Sheet1
SubjNum_FoodS1	traditionalBS_FoodS1	MeanTwd_FoodS1	MeanAwy_FoodS1	PeakTwd_FoodS1	PeakAwy_FoodS1	Variability_FoodS1	MeanTwdNT_FoodS1	MeanAwyNT_FoodS1	PeakTwdNT_FoodS1	PeakAwyNT_FoodS1	VariabilityNT_FoodS1	NumMatches_FoodS1	NumMatchesNT_FoodS1	MeanDist_FoodS1	MeanDistNT_FoodS1	SDDists_FoodS1	SDDistsNT_FoodS1
111	-1.94079	84.68	-92.8125	245	-263	117.288	72.5556	-105.119	218	-382	122.654	57	78	2.14035	1.71795	1.24554	0.992144
112	8.61346	84.6923	-69.0968	199	-332	100.461	66.2647	-69.093	256	-226	85.0196	57	77	2.17544	1.61039	1.21189	0.948071
113	-10.5994	73.2105	-74.7143	170	-211	87.8601	71.7879	-75.8095	311	-265	94.6456	54	75	2.01852	1.64	1.18943	0.967583
114	23.3611	99.4839	-78.2222	234	-203	104.769	77.7805	-74.4062	220	-235	94.5296	49	73	1.97959	1.49315	1.19878	0.689672
115	29.4406	109.28	-107	328	-283	140.5	121.306	-102.703	404	-263	142.809	52	73	1.38462	1.84932	0.690378	1.08872
116	24.3955	106.097	-83.6	393	-365	137.421	104.489	-96.2059	391	-310	137.385	56	77	1.94643	1.72727	1.11876	1.09588
117	8	65.1818	-57.12	202	-148	78.6893	54.1579	-52.5897	220	-163	70.2685	57	77	2.10526	1.64935	1.14462	0.899799
118	27.7159	156.5	-107.667	459	-314	171.525	137.051	-91.1053	453	-236	148.711	58	77	1.81034	1.64935	0.96349	0.870061
119	48.6579	209.808	-152.214	598	-610	232.763	158.479	-176.621	424	-511	206.335	54	77	2.07407	1.53247	1.09634	0.753665
120	40.7109	93.973	-57.8095	218	-191	89.9699	92.2927	-57.9722	260	-209	97.3864	58	77	2.06897	1.72727	1.09002	1.09588
121	67.5641	148.816	-99.7273	493	-237	143.766	127.932	-111.441	401	-325	150.859	49	78	1.71429	1.65385	0.912871	0.909216
122	-2.08077	82.8611	-70.7083	307	-236	97.9753	98.775	-81.5294	254	-265	113.092	60	74	2.2	1.74324	1.2185	1.03448
123	3.58351	77.2857	-98.7308	182	-250	108.512	71.9744	-90.1316	233	-238	101.21	54	76	2.11111	1.71053	1.31273	0.935461
124	-11.475	53.32	-63.4545	162	-197	75.2731	63.4359	-57.9487	266	-215	83.4423	58	77	2.03448	1.79221	1.16928	1.05553
211	0.875	68.5161	-96.5185	283	-291	117.91	64.2432	-82.7907	256	-325	105.165	58	80	1.82759	1.5625	0.975812	0.743644
212	-1.55	110	-120.593	334	-282	144.867	109.513	-103.341	303	-257	134.927	56	80	1.98214	1.5625	1.16761	0.839586
213	-32.8545	177.826	-252.758	548	-802	288.235	179.179	-186.976	823	-707	246.281	56	79	2.08929	1.77215	1.26888	1.1317
215	-4.525	65.5	-72.9688	150	-202	86.3883	76.0588	-88.9565	186	-304	103.568	58	80	1.84483	1.5875	0.932864	0.822065
216	11.9692	98.5143	-95.6316	293	-242	119.892	80.38	-85.7586	387	-266	106.914	54	79	1.88889	1.60759	0.94503	0.883143
217	58.125	139.842	-122.375	347	-488	163.633	123.588	-122.034	327	-378	156.009	54	80	1.75926	1.4375	0.970026	0.653012
218	6.35897	60.3333	-68.84	152	-176	78.8128	65.8864	-62.8857	207	-167	79.4699	58	79	1.68966	1.86076	0.882717	1.10632
219	20.9237	104.676	-58.0455	292	-318	115.897	86.9512	-95.3333	263	-372	118.318	55	79	1.61818	1.8481	0.827556	1.06324
220	54.964	118.526	-54.8333	265	-133	105.028	115.87	-101.2	289	-234	128.488	56	76	2.32143	1.57895	1.17716	0.820783
221	43.9231	89.5625	-49.6087	312	-153	95.504	72.5556	-56.3429	211	-140	82.9972	55	78	1.89091	1.5	1.14944	0.678998
222	-34.4359	102.478	-133.867	262	-336	144.476	94.8611	-140.136	284	-388	145.344	53	79	1.9434	1.65823	1.13366	0.875391
223	10.375	117.677	-95.1786	441	-397	144.562	123.619	-109.838	338	-412	151.471	58	79	1.75862	1.72152	0.801541	1.01194
224	-18.4	52.3448	-83.037	173	-226	88.3658	79.4688	-76.6042	206	-249	96.8687	55	80	1.83636	1.7	0.855562	1.01133
225	5.50405	93.7576	-139.24	306	-528	155.284	106.25	-135.6	445	-533	167.133	58	77	1.98276	1.5974	0.999849	0.949512
226	33.925	156.767	-125.083	338	-307	171.751	106.564	-161.939	310	-507	171.248	54	72	1.81481	1.88889	1.08287	1.19336
311	2.42244	94.5385	-88.7143	243	-233	118.365	83.3421	-67.878	215	-180	96.5339	54	78	1.57407	1.91026	0.791508	1.11874
313	-0.925	70.0294	-108.917	243	-313	107.499	78.22	-98.3667	294	-230	109.509	58	80	1.75862	1.775	0.844182	0.913679
314	13.5897	59.6765	-48.44	277	-143	79.3526	49.6905	-41.4722	193	-144	61.5672	58	78	2.01724	1.67949	1.08404	1.05059
315	-43.1237	124.448	-171.067	325	-381	176.718	131.306	-142.762	429	-421	176.398	59	78	1.94915	1.51282	1.00728	0.678876
316	18.3756	109.143	-95.7917	315	-220	123.097	85.2895	-67.6667	265	-220	101.804	59	76	1.89831	1.64474	1.12487	0.975759
317	-4.01538	88.1034	-81.871	264	-318	107.423	99.6061	-78.7955	360	-246	109.811	60	77	1.85	1.90909	0.971195	1.14916
318	-5.95	67.1212	-82.8	198	-228	91.8531	63.9524	-72.8421	189	-232	85.7794	58	80	1.89655	1.7375	0.949416	1.01562
319	-5.69231	108.143	-145.286	322	-456	166.631	104.5	-136.562	406	-378	157.808	56	76	1.625	1.71053	0.675883	1.05598
320	-6.64103	77.9677	-78.4444	328	-217	102.65	87.7222	-75.2683	286	-225	103.586	58	77	2.01724	1.55844	1.17714	0.834984
321	-11.9404	61.75	-104.286	215	-367	111.857	89.973	-87.1795	365	-236	112.942	55	76	2.09091	1.56579	0.98644	0.970711
324	-4.23077	72.037	-88.5484	352	-229	108.087	67.8684	-78.725	234	-274	96.6285	57	78	1.96491	1.79487	1.17966	1.04892
325	-2.89487	150.767	-181.346	573	-759	237.132	129.442	-146.314	472	-435	180.376	56	78	1.80357	1.91026	1.06889	1.21875
326	-15.025	109.808	-113.062	238	-469	154.237	101.8	-74	328	-419	123.677	56	80	2.01786	1.725	1.13604	1.05513
327	12.6167	101.269	-59.9286	462	-167	111.072	121.368	-127.969	365	-384	158.081	54	70	2.01852	1.58571	1.03688	0.955425
411	-10.2895	146.091	-151.31	367	-382	180.826	138.025	-143.324	343	-333	172.511	51	77	1.47059	1.79221	0.730834	1.04299
412	-35.9109	91.68	-112.562	441	-294	132.294	133.5	-123.938	423	-393	162.058	57	78	1.89474	1.85897	1.08041	1.20307
413	26.1487	100.316	-89.1304	391	-328	131.171	86.04	-80.6296	249	-368	109.958	61	76	1.96721	1.78947	1.07962	1.09928
414	9.9	60.0938	-85.28	319	-232	94.5598	53.8462	-58.4688	278	-177	75.7221	57	71	2.17544	1.69014	1.07109	1.07692
415	26.1934	112.452	-78.64	358	-210	120.311	109.8	-63.0698	339	-275	105.942	56	78	1.82143	1.61538	1.01098	0.90066
416	-2.70789	85	-78.5161	319	-212	104.178	93.4359	-105.897	348	-464	131.437	58	78	2.13793	2.02564	1.2628	1.25847
417	37.3442	119.297	-96.8571	347	-303	127.647	129.451	-108.731	377	-414	157.886	58	76	1.86207	1.81579	1.13088	1.10406
418	14.0179	54.9722	-36.9167	206	-205	62.2088	52.4583	-53	247	-181	71.1496	60	77	2.08333	1.68831	1.16868	1.0293
419	-19.7608	98.5	-81.6667	281	-260	112.744	79.0256	-85.0857	255	-318	109.648	56	73	2.08929	1.64384	1.16427	0.918481
420	8.175	50.25	-45.7419	113	-107	57.882	56.1316	-68.3415	204	-238	85.8972	59	79	1.89831	1.82278	1.10944	1.03477
421	-12.9422	107.217	-119.111	606	-459	170.126	112.667	-148.308	666	-505	200.128	49	72	1.91837	1.84722	0.909137	1.10899
422	70.5782	258.767	-192.28	840	-836	319.365	221.674	-221.188	1091	-968	313.004	55	75	1.87273	1.62667	0.74671	0.926682
423	-26.1613	80.25	-99.2727	250	-364	122.268	100.167	-98.2195	520	-304	138.392	60	77	2.38333	1.67532	1.18023	0.849792
424	-7.05477	160.333	-120.034	475	-366	179.743	114.054	-106.816	311	-453	150.184	53	75	1.83019	1.61333	0.975386	0.868259
511	-27	117.619	-105.361	374	-316	140.036	102.395	-114.425	383	-417	144.128	57	78	1.96491	1.48718	1.10138	0.751511
512	5.42308	133.581	-135.75	351	-397	169.567	132.289	-119.872	365	-418	165.481	58	77	2.01724	1.46753	1.06773	0.699331
513	51.1955	179.73	-130.636	564	-510	211.563	151.325	-123.675	845	-808	215.274	59	79	1.72881	1.6962	0.943773	0.965487
514	32.25	122.359	-78.6667	382	-278	129.582	104	-114.531	291	-337	133.667	63	80	1.90476	1.85	1.13186	1.08032
515	17.6923	166.75	-126.4	398	-381	183.849	140.211	-116.275	459	-400	163.785	58	78	1.98276	1.91026	0.982146	1.10707
516	13.1	73.1875	-51.9167	202	-203	79.1617	82.2245	-76.1111	329	-248	96.9455	56	76	2.16071	1.75	1.10826	1.05987
517	-15.4645	65.8824	-95.2895	399	-407	113.108	105.179	-77.5122	406	-185	127.314	55	78	1.89091	1.55128	0.993921	0.766971
519	21.9325	77.7429	-49.4211	341	-182	90.2002	84.74	-54.25	368	-199	103.19	54	77	2.03704	1.58442	0.989815	0.766926
520	54.7632	116.711	-145.412	291	-323	153.882	156.395	-120.265	415	-351	177.032	55	72	1.96364	1.94444	1.10493	1.22059
521	19.1609	80.3704	-64.1111	224	-178	95.9265	69.9778	-67.6471	261	-212	88.7657	53	78	1.83019	1.66667	0.975386	0.935125
522	33.7155	224.2	-127.161	541	-371	217.579	169.957	-139.519	526	-498	199.091	56	72	2.19643	1.86111	1.1349	1.07867
523	2.23077	53.5938	-50.3913	204	-165	68.212	63	-75.0857	262	-210	91.0182	55	78	1.78182	1.85897	0.853986	1.12497
524	27.8495	123.438	-101.8	364	-364	139.818	101.324	-99.975	325	-319	131.755	52	77	1.78846	1.74026	1.09072	0.951489
525	-12.6147	119.696	-120.086	419	-364	158.246	118.914	-137.286	413	-414	171.87	58	77	1.75862	1.79221	0.904382	1.04299
611	7.12027	111.6	-117.821	531	-304	155.937	128.489	-220.938	537	-677	228.033	58	77	2.36207	1.64935	1.19499	0.899799
612	39.6295	118.302	-79.6429	414	-369	131.308	101.902	-65.5385	368	-303	116.404	57	79	1.89474	1.62025	0.919709	0.951433
613	35.5128	106.833	-64.0435	341	-372	125.671	74.8478	-63.8125	309	-283	97.0554	58	78	1.84483	1.5641	1.0396	0.861737
614	-4.5	100.759	-109.321	371	-358	144.744	86.0789	-101.714	217	-402	127.17	57	80	1.66667	1.8375	0.95119	1.0726
615	109.3	319.825	-288.25	851	-597	348.662	235.159	-294.229	561	-912	321.654	60	79	2.1	1.83544	1.23096	1.14836
616	4.21316	50.0938	-48.6	160	-174	65.6969	49.2955	-52.0588	226	-193	71.3058	57	78	1.78947	1.44872	0.958735	0.616809
617	-14.475	82.9545	-87.0571	314	-209	110.673	93.5161	-95.4651	273	-321	118.949	56	74	1.64286	1.75676	0.942503	1.0178
618	48.6863	134.474	-125.684	447	-279	160.377	121.22	-104.765	440	-281	147.994	57	75	2.03509	1.50667	1.11747	0.704682
619	11.425	66.0882	-75.0909	303	-254	97.7436	75.6	-79.025	191	-295	98.1496	55	80	1.65455	1.75	0.985416	0.974355
621	27.0769	93.4667	-59.4167	313	-238	103.119	99.878	-93.9355	284	-283	116.868	54	72	2.31481	1.625	1.39844	0.941044
622	-18.1197	64.3462	-61.0968	165	-348	90.3316	76.1818	-85.2045	353	-340	116.433	56	77	1.98214	1.84416	1.10357	1.01392
623	16.8019	71.7838	-63.3636	208	-244	87.5915	68.4286	-56.875	229	-232	83.4586	59	74	2.37288	1.55405	1.28517	0.908738
624	-28.675	179.115	-171.059	523	-688	234.858	152.525	-186.1	477	-695	228.894	60	80	2.3	1.675	1.29274	1.06468
625	-35.4177	45.8421	-98.8649	154	-352	97.9274	78.5278	-93.1707	206	-235	104.2	56	77	1.96429	1.66234	1.02628	0.94047
