# Supplementary material for: Food Palatability Directs Our Eyes Across Contexts
Source: Frontiers journal article supplement (doi:10.3389/fpsyg.2021.664893), 2021-05-31
Supplement: Data_Sheet_1.zip [file HedonicoutputTrialLevel_Food_S1.xlsx]

## Sheet: Sheet1
111	1	540	3	1
111	2	378	3	1
111	3	475	1	1			97	1
111	4	348	1	1	-193	5	-145	1
111	5	493	3	1
111	6	422	1	1	-119	3	-19	1
111	7	441	3	1
111	8	404	1	1	-137	1	-37	1
111	9	541	2	1			-170	1
111	10	371	3	1
111	11	313	3	1
111	12	315	2	1	-8	2	-2	1
111	13	315	2	1	-8	1	62	2
111	14	307	1	1			-70	1
111	15	377	3	1
111	16	309	3	1
111	17	316	2	1	-9	3	-7	1
111	18	409	2	1	-96	3	-100	2
111	19	271	2	1	42	2	38	3
111	20	356	2	1	-43	1	-47	4
111	21	313	1	1	-39	1	-257	4
111	22	352	2	1			218	3
111	23	459	2	1	-146	2	111	2
111	24	360	2	1	176	2	210	1
111	25	570	3	1
111	26	536	1	1	-39	1	-34	1
111	27	575	2	1			-6	2
111	28	642	2	1	-106	2	-73	1
111	29	569	3	1
111	30	481	3	1
111	31	440	2	1	-77	3	41	1
111	32	599	2	1	-236	2	-118	2
111	34	363	1	1	-8	1	-72	4
111	35	371	2	1			64	3
111	36	589	2	1	-226	2	-154	2
111	37	413	2	1	14	2	22	1
111	38	435	3	1
111	39	427	1	1	-10	1	-8	1
111	40	437	2	1			-62	1
111	41	375	3	1
111	43	332	3	1
111	44	537	2	1	-141	4	-205	1
111	45	659	2	1	-263	3	-351	1
111	46	308	3	1
111	47	323	3	1
111	48	396	1	1	29	1	73	1
111	49	367	2	1			44	1
111	50	411	3	1
111	51	339	3	1
111	52	319	2	1	66	1	20	1
111	53	385	1	1			-84	1
111	54	469	3	1
111	55	571	3	1
111	56	360	2	1	-39	1	211	1
111	57	321	1	1			-250	2
111	58	425	1	1	65	2	40	3
111	59	359	1	1	-1	3	-26	2
111	60	434	1	1	74	4	49	1
111	61	385	3	1
111	62	381	3	1
111	63	625	1	1	245	3	2	1
111	64	623	3	1
111	65	432	1	1	52	1	-191	1
111	66	380	2	1	215	1	145	2
111	67	595	1	1			70	1
111	68	525	3	1
111	69	560	1	1	180	3	168	1
111	70	392	3	1
111	71	477	1	1	111	3	85	1
111	72	291	1	1	-75	2	-101	2
111	73	348	1	1	-18	1	-29	3
111	74	366	2	1			11	2
111	75	374	2	1	-61	2	3	1
111	76	377	3	1
111	77	313	1	1	-188	1	-64	1
111	78	501	2	1	-53	1	151	2
111	79	448	1	1			-204	1
111	80	652	3	1
111	81	270	1	1	-231	3	-382	1
111	82	301	1	1	-200	4	-351	2
111	83	484	1	1	-17	5	36	3
111	84	414	1	1			-34	2
111	85	458	1	1	184	5	10	1
111	86	448	3	1
111	87	483	1	1	209	3	-82	1
111	88	565	3	1
111	89	312	3	1
111	90	274	2	1			5	1
111	91	279	3	1
111	92	455	2	1	-65	2	41	1
111	93	496	3	1
111	94	390	1	1			-50	1
111	95	440	3	1
111	96	456	1	1	82	1	16	1
111	97	374	2	1	28	1	66	2
111	98	402	1	1	10	1	-38	3
111	99	392	2	1	-62	1	48	4
111	100	330	1	1	11	1	-55	5
111	101	319	2	1	8	1	66	4
111	102	327	1	1			-58	3
111	103	344	1	1	-56	1	-41	2
111	104	400	2	1			-15	1
111	105	385	3	1
111	106	584	1	1	9	1	199	1
111	107	575	2	1			-193	1
111	108	382	3	1
111	109	344	3	1
111	110	343	1	1	27	1	-1	1
111	111	316	2	1			28	2
111	112	291	2	1	52	2	51	3
111	113	287	2	1	56	3	55	2
111	114	286	2	1	57	4	56	1
111	115	342	3	1
111	116	342	3	1
111	117	320	3	1
111	118	487	3	1
111	119	401	1	1	115	5	-86	1
111	120	344	1	1			-143	2
112	1	396	1	1	48	1
112	2	348	2	1			7	5
112	3	338	2	1	-19	1	17	4
112	4	319	1	1	-54	1	-36	3
112	5	373	2	1			-18	2
112	6	272	2	1	47	2	83	1
112	7	355	3	1
112	8	229	2	1	122	2	102	1
112	9	331	3	1
112	10	351	1	1			20	1
112	11	307	1	1	78	3	-24	2
112	12	313	1	1	84	4	-129	3
112	13	383	1	1	154	5	-59	2
112	14	382	1	1	-8	5	-60	1
112	15	442	3	1
112	16	363	1	1	-27	3	-79	1
112	17	307	1	1	-83	2	56	1
112	18	251	3	1
112	19	390	2	1			-64	1
112	20	326	3	1
112	21	342	3	1
112	22	324	2	1	-17	5	-16	1
112	23	308	3	1
112	24	303	3	1
112	25	277	2	1	80	3	17	1
112	26	294	3	1
112	27	246	3	1
112	28	357	1	1	28	2	74	1
112	29	283	3	1
112	30	329	2	1			-46	1
112	31	279	2	1	100	2	4	2
112	32	346	2	1	33	1	-81	3
112	33	379	1	1			114	2
112	34	318	1	1	-28	2	53	1
112	35	265	3	1
112	36	319	3	1
112	37	304	1	1	-15	1	-15	1
112	38	319	2	1			9	1
112	39	328	3	1
112	40	373	1	1	54	2	45	1
112	41	383	1	1	64	3	18	1
112	42	365	3	1
112	43	340	3	1
112	44	296	3	1
112	45	379	2	1	-42	4	-83	1
112	46	380	2	1	-43	3	-116	1
112	47	264	3	1
112	48	310	3	1
112	49	337	1	1			-164	1
112	50	501	3	1
112	51	386	1	1	45	2	-115	1
112	52	276	1	1	-65	1	-74	2
112	53	341	2	1			9	1
112	54	350	3	1
112	55	323	1	1	-253	1	-27	1
112	56	576	2	1	-332	1	-226	2
112	57	244	1	1			-89	2
112	58	321	1	1	-255	2	-12	1
112	59	333	3	1
112	60	371	1	1	-13	3	-57	1
112	61	428	3	1
112	62	343	1	1	-41	1	-85	1
112	63	384	2	1			44	2
112	64	347	2	1	57	1	-26	2
112	65	404	1	1			83	1
112	66	321	3	1
112	67	438	2	1	-34	2	-117	1
112	68	263	2	1	77	3	58	2
112	69	388	2	1	-48	2	-67	3
112	70	237	2	1	103	1	256	3
112	71	340	1	1	-65	1	-153	2
112	72	405	2	1			88	1
112	73	493	3	1
112	74	328	3	1
112	75	332	3	1
112	76	354	2	1	-69	1	-22	1
112	77	285	1	1			-47	2
112	78	276	1	1	-17	2	-39	3
112	79	426	1	1	133	1	111	2
112	80	293	2	1			22	1
112	81	315	3	1
112	82	382	2	1	-68	1	-67	1
112	83	314	1	1			-91	2
112	84	291	1	1	-91	2	-114	1
112	85	405	3	1
112	86	359	1	1	97	1	-46	1
112	87	262	2	1			-17	2
112	88	318	2	1	41	2	-73	1
112	89	245	3	1
112	90	376	2	1	-17	4	-64	1
112	91	312	3	1
112	92	360	2	1	-24	5	35	1
112	93	395	3	1
112	94	389	2	1	-53	3	1	1
112	95	390	3	1
112	96	373	2	1	-37	1	17	1
112	97	336	1	1			-52	2
112	98	273	1	1	-9	2	-115	1
112	99	388	3	1
112	100	282	2	1			72	1
112	101	354	3	1
112	102	388	2	1	-115	4	-32	1
112	103	356	3	1
112	104	311	2	1	106	3	92	1
112	105	403	3	1
112	106	372	2	1	45	1	31	1
112	107	417	1	1			99	1
112	108	318	3	1
112	109	395	3	1
112	110	533	1	1	47	1	138	1
112	111	486	2	1	-61	1	-134	2
112	112	425	1	1			73	1
112	113	352	3	1
112	114	347	1	1	-139	3	-5	1
112	115	460	1	1	93	3	108	2
112	116	448	1	1	81	2	96	3
112	117	553	1	1	186	1	201	4
112	118	367	2	1			-15	5
112	119	354	2	1	199	2
113	1	557	1	1	170	4	129	2
113	2	498	1	1	111	3	70	1
113	3	428	3	1
113	4	552	3	1
113	5	387	2	1			99	1
113	6	486	3	1
113	7	532	2	1	-148	4	-75	1
113	8	457	3	1
113	9	402	3	1
113	10	415	2	1	-31	1	-13	1
113	11	384	1	1	-116	1	-18	2
113	12	500	2	1			-72	2
113	13	464	2	1	-80	2	-36	1
113	14	428	3	1
113	15	353	3	1
113	16	360	2	1	92	2	53	1
113	17	413	3	1
113	18	452	1	1	-49	1	39	1
113	19	501	2	1	-152	1	-88	2
113	20	349	1	1	-54	1	-132	3
113	21	403	2	1	-81	1	78	2
113	22	322	1	1			-159	1
113	23	481	3	1
113	24	483	2	1	-73	2	-45	1
113	25	438	3	1
113	26	410	1	1			-70	1
113	27	480	3	1
113	28	351	1	1	-40	1	-129	1
113	29	391	2	1	136	1	89	2
113	30	527	1	1			47	3
113	31	394	1	1	3	2	-86	4
113	32	449	1	1	63	2	-31	5
113	33	414	1	1	28	1
113	34	386	2	1			6	5
113	35	514	2	1	-100	2	-122	4
113	36	388	2	1	87	2	4	3
113	37	419	2	1	56	1	-27	2
113	38	475	1	1			83	1
113	39	392	3	1
113	40	366	2	1	109	2	26	1
113	41	392	3	1
113	42	438	2	1	-88	2	3	1
113	43	441	3	1
113	44	350	1	1			-91	1
113	45	442	1	1	-23	2	1	2
113	46	415	1	1	-50	1	-26	3
113	47	465	2	1			-37	3
113	49	432	2	1	-17	3	-4	1
113	50	428	3	1
113	51	571	2	1	-211	2	-159	1
113	52	412	3	1
113	53	360	1	1	-188	1	-52	1
113	54	548	2	1	-157	1	-136	2
113	55	391	1	1	-46	1	-21	3
113	56	437	2	1	-93	1	-82	3
113	57	344	1	1			-11	2
113	58	460	1	1	35	2	105	1
113	59	355	3	1
113	60	425	2	1			36	1
113	61	461	3	1
113	62	431	2	1	-32	3	15	1
113	63	446	3	1
113	64	403	2	1	-4	1	43	1
113	65	399	1	1			-265	1
113	66	664	3	1
113	67	401	3	1
113	68	374	2	1	25	3	27	1
113	69	457	2	1	48	3	-80	1
113	70	377	3	1
113	71	463	2	1	42	1	-86	1
113	72	505	1	1			-76	1
113	73	581	3	1
113	74	492	2	1	-123	1	89	1
113	75	369	1	1			-48	1
113	76	417	3	1
113	77	474	3	1
113	78	416	2	1	59	1	58	1
113	79	475	1	1			-88	1
113	80	563	3	1
113	81	345	3	1
113	82	398	1	1	-18	4	-59	1
113	83	457	3	1
113	84	479	3	1
113	85	380	1	1	-105	2	-99	1
113	86	452	1	1	-33	1	-27	2
113	87	485	2	1			-22	3
113	88	430	2	1	-65	1	33	2
113	89	365	1	1			-98	1
113	90	463	3	1
113	91	417	1	1	-13	3	7	1
113	92	410	3	1
113	93	411	1	1	-19	5	1	1
113	94	714	1	1	150	5	311	2
113	95	481	1	1	-83	4	78	1
113	96	403	3	1
113	97	509	1	1	-55	2	71	1
113	98	438	3	1
113	99	564	2	1	-3	1	-126	1
113	100	561	1	1			123	2
113	101	438	1	1	-30	1	-102	2
113	102	468	2	1			72	1
113	103	540	3	1
113	104	667	3	1
113	105	516	2	1	-90	2	151	1
113	106	414	2	1	12	1	253	2
113	107	426	1	1			-119	2
113	109	545	3	1
113	110	571	2	1	-145	3	-26	1
113	111	459	2	1	56	3	86	2
113	114	515	1	1			-124	1
113	115	639	3	1
113	116	568	1	1	109	5	-17	1
113	117	585	3	1
113	118	534	1	1			83	1
113	119	451	3	1
113	120	672	3	1
114	1	446	2	1	49	2	33	1
114	2	479	3	1
114	3	495	1	1			-14	1
114	4	509	3	1
114	5	509	3	1
114	6	558	1	1	112	5	-42	1
114	7	600	3	1
114	8	534	1	1			171	1
114	9	363	3	1
114	10	382	1	1	-15	4	19	1
114	11	349	1	1	-48	3	-28	1
114	12	377	3	1
114	13	317	1	1	-80	1	-60	1
114	14	397	2	1			7	1
114	15	404	3	1
114	16	437	1	1	1	1	33	1
114	17	436	2	1	27	1	-32	2
114	18	463	1	1			82	2
114	19	485	1	1	-11	2	104	1
114	20	381	3	1
114	21	496	2	1			-180	1
114	22	316	3	1
114	23	416	3	1
114	24	348	2	1	107	1	68	1
114	25	455	1	1			29	1
114	26	426	3	1
114	27	583	1	1	120	1	157	1
114	28	463	2	1			-37	2
114	29	444	2	1	37	1	33	3
114	30	481	1	1			4	2
114	31	594	1	1	107	2	117	1
114	32	477	3	1
114	33	487	2	1			-51	1
114	34	436	3	1
114	35	513	3	1
114	36	345	1	1	-92	3	-168	1
114	37	483	1	1	46	2	112	1
114	38	371	3	1
114	39	437	2	1			45	1
114	40	482	3	1
114	41	392	3	1
114	42	416	3	1
114	43	431	2	1	-87	3	-15	1
114	44	516	2	1	-172	2	-100	2
114	45	468	2	1	-124	1	17	3
114	46	344	1	1	-65	1	-141	2
114	47	409	2	1			76	1
114	48	485	3	1
114	49	401	3	1
114	50	462	2	1	24	1	-61	1
114	51	486	1	1	7	1	85	2
114	52	479	2	1			-78	3
114	53	501	2	1	53	1	27	3
114	54	554	1	1	123	1	26	2
114	55	431	2	1			97	1
114	56	528	3	1
114	57	487	2	1	154	3	84	1
114	58	571	3	1
114	59	481	3	1
114	60	641	1	1	107	2	160	1
114	61	488	1	1	-46	1	26	2
114	62	534	2	1			-72	1
114	63	462	3	1
114	64	564	2	1	-39	1	-102	1
114	65	525	1	1			63	2
114	67	549	1	1	-13	1	96	3
114	68	562	2	1			-109	2
114	69	459	2	1	90	2	-6	1
114	70	453	3	1
114	71	458	3	1
114	72	553	1	1	157	3	95	1
114	73	452	1	1	56	2	-122	1
114	74	574	3	1
114	75	396	2	1	123	1	178	1
114	76	519	1	1			-55	2
114	77	547	1	1	151	2	-50	3
114	78	594	1	1	198	3	-3	2
114	79	560	1	1	164	4	-37	1
114	80	597	3	1
114	81	463	1	1	-127	3	-134	1
114	82	454	1	1	-136	2	-57	1
114	83	511	3	1
114	84	590	2	1	101	1	-79	1
114	85	691	1	1			180	2
114	86	522	1	1	-203	1	-30	2
114	87	725	2	1			-173	1
114	88	552	3	1
114	90	534	2	1	234	2	18	2
114	91	603	2	1	165	1	50	3
114	92	768	1	1	44	1	115	2
114	93	724	2	1			-71	1
114	94	653	3	1
114	95	418	1	1	-6	1	-235	1
114	96	424	2	1			-23	1
114	97	401	3	1
114	98	417	2	1	55	1	-16	1
114	99	472	1	1			71	2
114	101	458	1	1	152	1	127	3
114	102	306	2	1			25	2
114	103	281	2	1	177	2	50	1
114	104	331	3	1
114	105	536	3	1
114	106	498	2	1	-40	5	38	1
114	107	355	2	1	126	5	157	2
114	108	464	2	1	17	4	48	1
114	109	512	3	1
114	110	585	2	1	-104	2	220	1
114	111	805	3	1
114	112	481	1	1			46	1
114	113	435	3	1
115	1	593	3	1
115	2	575	3	1
115	3	718	3	1
115	4	596	3	1
115	5	663	1	1	-51	3	67	1
115	6	680	1	1	-34	2	84	2
115	7	629	1	1	-85	1	33	3
115	8	714	2	1	36	1	-185	3
115	9	750	1	1	3	1	221	2
115	10	747	2	1			-218	1
115	11	529	3	1
115	12	856	3	1
115	13	452	2	1	83	2	404	1
115	14	745	2	1	-210	1	111	2
115	15	535	1	1			-94	2
115	16	560	1	1	-185	2	-69	1
115	17	629	3	1
115	18	504	3	1
115	19	559	3	1
115	20	466	1	1	-125	1	-93	1
115	21	591	2	1			-211	2
115	22	395	2	1	71	2	-15	1
115	23	380	3	1
115	24	669	3	1
115	25	638	2	1	120	3	31	1
115	27	741	3	1
115	28	758	1	1	-17	1	17	1
115	29	775	2	1			-34	2
115	30	543	2	1	-3	1	198	3
115	31	540	1	1	-34	1	-59	4
115	32	574	2	1			25	3
115	33	595	2	1	-32	1	4	2
115	34	563	1	1			-36	1
115	35	599	3	1
115	36	832	2	1	-251	1	-233	1
115	37	581	1	1			-75	1
115	38	656	3	1
115	39	519	3	1
115	40	585	2	1	48	3	-118	1
115	41	467	3	1
115	42	494	2	1	139	1	-27	1
115	43	633	1	1	228	1	50	2
115	44	405	2	1			178	1
115	45	583	3	1
115	46	620	3	1
115	47	517	1	1	57	1	-103	1
115	48	460	2	1			-96	1
115	49	364	3	1
115	50	361	3	1
115	51	397	2	1	-15	1	-36	1
115	52	382	1	1	-63	1	21	2
115	53	445	2	1	328	1	213	2
115	54	773	1	1			115	1
115	55	658	3	1
115	56	650	2	1	10	1	8	1
115	57	660	1	1			-86	1
115	58	746	3	1
115	59	735	1	1	11	3	274	1
115	60	461	3	1
115	62	724	2	1	-180	2	-263	2
115	63	609	2	1	-65	1	-148	3
115	64	544	1	1			83	4
115	65	625	1	1	123	1	198	4
115	66	502	2	1			-75	3
115	67	555	2	1	66	1	-128	2
115	68	621	1	1			194	1
115	69	427	3	1
115	70	396	2	1	1	1	31	1
115	71	397	1	1			-22	1
115	72	419	3	1
115	73	436	2	1	-39	2	181	1
115	74	617	3	1
115	76	441	3	1
115	77	509	1	1	55	1	68	1
115	78	454	2	1			165	1
115	79	619	3	1
115	80	613	2	1	-104	3	-77	1
115	81	536	3	1
115	82	932	3	1
115	83	656	3	1
115	84	662	3	1
115	85	659	1	1	236	1	-3	1
115	86	423	2	1			311	1
115	87	734	3	1
115	88	394	3	1
115	89	409	3	1
115	90	379	1	1	-46	1	-30	1
115	91	425	2	1			-16	2
115	92	548	2	1	-28	1	-139	3
115	93	520	1	1	-82	1	111	4
115	94	602	2	1	-122	1	-193	5
115	95	480	1	1
115	96	408	1	1	-283	1
115	97	691	2	1
115	98	414	2	1	173	1
115	99	587	1	1			12	5
115	100	498	1	1	6	1	-77	4
115	101	492	2	1	-80	1	83	3
115	102	412	1	1	-243	1	-163	2
115	103	655	2	1			-80	1
115	104	575	3	1
115	105	502	3	1
115	106	449	1	1	-196	3	-253	1
115	107	702	3	1
115	108	870	1	1	225	1	168	1
115	109	645	2	1			-57	1
115	110	588	3	1
115	111	891	1	1	284	2	303	1
115	112	677	1	1	70	1	89	2
115	113	607	2	1	129	1	-19	3
115	114	736	1	1	136	1	48	3
115	115	600	2	1	94	1	88	2
115	116	694	1	1			6	1
115	117	688	3	1
115	118	640	1	1	-269	2	-48	1
115	119	862	1	1	-47	1	174	2
115	120	909	2	1			-221	3
116	1	748	2	1	-365	3	-276	2
116	2	468	2	1	-85	2	4	1
116	3	472	3	1
116	4	383	1	1			-109	1
116	5	492	3	1
116	6	480	1	1	12	4	88	1
116	7	392	3	1
116	8	527	3	1
116	9	615	3	1
116	10	416	3	1
116	11	549	2	1	23	4	-133	1
116	12	412	2	1	160	3	128	1
116	13	540	3	1
116	14	545	3	1
116	15	572	1	1	-48	1	27	1
116	16	620	2	1			11	1
116	17	631	3	1
116	18	697	1	1	129	1	66	1
116	19	568	2	1			-15	1
116	20	553	3	1
116	21	656	1	1	88	2	103	1
116	22	587	1	1	-40	2	-140	1
116	23	727	3	1
116	24	627	2	1	-84	2	100	1
116	25	429	2	1	114	1	298	2
116	26	543	1	1			-184	3
116	27	822	1	1	393	2	286	3
116	28	558	1	1	-168	3	22	2
116	29	570	1	1	-156	2	34	1
116	30	536	3	1
116	31	726	2	1			-190	1
116	32	609	2	1	-166	2	-73	2
116	33	538	2	1	-95	1	102	2
116	34	443	1	1			-197	1
116	35	640	3	1
116	36	763	3	1
116	37	453	1	1	-85	4	-310	1
116	38	399	1	1	-2	4	-202	1
116	39	601	3	1
116	40	565	3	1
116	41	423	3	1
116	42	401	2	1	226	1	22	1
116	43	627	1	1			60	1
116	44	567	3	1
116	45	506	3	1
116	46	499	2	1	75	3	-25	1
116	47	474	3	1
116	48	619	2	1	-45	1	-145	1
116	49	574	1	1			76	1
116	50	498	3	1
116	51	562	1	1	14	1	64	1
116	52	548	2	1			8	1
116	53	556	3	1
116	54	502	1	1	-46	2	30	1
116	55	472	3	1
116	56	548	3	1
116	57	432	1	1	32	1	-116	1
116	58	400	2	1	374	1	148	2
116	59	774	1	1	303	1	226	3
116	60	471	2	1	140	1	77	4
116	61	611	1	1			53	5
116	62	613	1	1	21	1	55	4
116	63	592	2	1	-28	1	-34	3
116	64	564	1	1	83	1	6	2
116	65	481	2	1			77	1
116	66	558	3	1
116	67	526	1	1	68	1	-32	1
116	68	458	2	1			199	1
116	69	657	3	1
116	70	396	2	1	130	3	261	1
116	71	477	2	1	239	3	3	1
116	72	480	3	1
116	73	543	2	1	173	1	-63	1
116	74	716	1	1			259	1
116	75	457	3	1
116	76	561	3	1
116	77	647	1	1	139	4	86	1
116	78	601	1	1	93	3	202	1
116	79	399	3	1
116	80	470	3	1
116	81	508	2	1	-20	1	-38	1
116	82	488	1	1			18	2
116	83	538	1	1	-39	1	0	3
116	84	577	2	1	-39	1	-39	2
116	85	538	1	1			0	1
116	86	538	3	1
116	87	438	3	1
116	88	606	3	1
116	89	542	1	1	-2	3	-64	1
116	90	548	1	1	4	2	-58	2
116	91	435	1	1	-109	1	-171	3
116	92	544	2	1			62	4
116	93	565	2	1	19	1	41	5
116	94	584	1	1
116	95	572	1	1	78	1
116	96	494	2	1			62	5
116	97	695	2	1	-323	2	-139	4
116	98	420	2	1	-48	1	136	3
116	99	372	1	1			-184	2
116	100	450	1	1	71	2	-106	1
116	101	556	3	1
116	102	379	2	1			177	1
116	103	401	2	1	-19	3	-9	1
116	104	392	3	1
116	105	421	3	1
116	106	382	1	1	-28	2	-39	1
116	107	417	1	1	7	1	-4	2
116	108	410	2	1			-4	2
116	109	449	2	1	2	2	-43	1
116	110	406	3	1
116	111	451	1	1	-22	1	45	1
116	112	473	2	1	1	1	-67	2
116	113	474	1	1	66	1	-62	2
116	114	408	2	1			128	1
116	115	536	3	1
116	116	853	3	1
116	117	502	2	1	-28	4	351	1
116	118	462	2	1	12	5	391	2
116	119	743	2	1			110	3
117	2	319	1	1	44	2
117	3	302	1	1	27	1	-16	5
117	4	275	2	1	19	1	43	4
117	5	294	1	1			-24	3
117	6	362	1	1	87	2	44	2
117	7	298	1	1	3	3	-20	1
117	8	318	3	1
117	9	339	1	1	44	1	21	1
117	10	295	2	1			-58	1
117	11	237	3	1
117	12	295	1	1	0	2	23	1
117	13	272	3	1
117	14	402	1	1	125	4	130	1
117	15	431	1	1	154	3	159	2
117	16	297	1	1	20	2	25	3
117	17	319	1	1	42	1	22	3
117	18	277	2	1	77	1	20	2
117	19	354	1	1			57	1
117	20	297	3	1
117	21	350	1	1	-72	2	-31	1
117	22	381	3	1
117	23	422	2	1	-87	2	-41	1
117	24	450	2	1	-115	1	-69	2
117	25	335	1	1			-76	2
117	26	375	1	1	-75	2	-36	1
117	27	411	3	1
117	29	432	2	1	-57	3	-163	1
117	30	269	3	1
117	32	420	2	1	-61	2	-151	2
117	33	321	2	1	38	1	-38	2
117	34	359	1	1			76	1
117	35	283	3	1
117	36	261	1	1	-28	2	-22	1
117	37	316	1	1	27	1	33	2
117	38	289	2	1	80	1	-6	3
117	39	369	1	1			-21	3
117	40	298	1	1	9	2	-92	2
117	41	286	1	1	-89	3	-104	1
117	42	390	3	1
117	43	263	3	1
117	44	375	2	1	-106	1	-112	1
117	45	269	1	1			-15	2
117	46	227	1	1	-148	2	-57	1
117	47	284	3	1
117	48	322	1	1	-25	2	38	1
117	49	313	1	1	-34	1	29	2
117	50	347	2	1			-78	2
117	51	361	2	1	-48	2	-92	1
117	52	269	3	1
117	53	361	2	1	-48	4	-60	1
117	54	301	3	1
117	55	317	3	1
117	56	276	2	1	67	3	38	1
117	57	314	3	1
117	58	318	3	1
117	59	343	1	1			25	1
117	60	318	3	1
117	61	358	1	1	82	5	40	1
117	63	251	3	1
117	64	290	3	1
117	65	256	3	1
117	66	356	1	1	133	1	100	1
117	67	223	2	1			33	2
117	68	291	2	1	74	1	-31	2
117	69	365	1	1			105	1
117	70	260	3	1
117	71	363	2	1	2	2	-72	1
117	72	291	3	1
117	73	257	2	1	108	4	49	1
117	74	306	3	1
117	75	292	2	1	192	5	186	1
117	76	478	3	1
117	77	305	3	1
117	78	282	2	1	202	2	-26	1
117	79	256	3	1
117	80	484	1	1			220	1
117	81	264	3	1
117	82	290	1	1	-30	1	26	1
117	83	320	2	1			18	1
117	84	338	3	1
117	85	316	1	1	-2	2	-22	1
117	86	292	1	1	-26	1	-46	2
117	87	318	2	1			-32	2
117	88	285	2	1	7	2	1	1
117	89	286	3	1
117	90	413	2	1	-121	4	-127	1
117	91	343	2	1	-61	5	-66	1
117	92	277	3	1
117	93	276	3	1
117	94	294	3	1
117	95	244	3	1
117	96	282	1	1	-85	1	38	1
117	97	367	2	1			-67	2
117	98	258	2	1	61	2	42	1
117	99	300	3	1
117	100	319	1	1	14	2	19	1
117	101	301	1	1	-4	1	3	2
117	102	305	2	1			-7	1
117	103	298	3	1
117	104	265	3	1
117	105	414	1	1	127	1	149	1
117	106	287	2	1			-22	2
117	107	285	2	1	129	2	18	2
117	108	342	2	1	72	3	-39	1
117	109	303	3	1
117	110	271	2	1	11	2	32	1
117	111	324	2	1	-42	1	-21	2
117	112	282	1	1			-21	3
117	113	317	1	1	41	1	14	4
117	114	276	2	1			38	4
117	115	327	2	1	-10	2	-13	3
117	116	284	2	1	33	3	30	2
117	117	371	2	1	-54	4	-57	1
117	118	314	3	1
117	119	255	2	1			59	1
117	120	259	2	1			55	2
118	1	372	3	1
118	2	524	2	1	6	2	-152	1
118	3	581	2	1	-51	1	-209	2
118	4	530	1	1	-47	1	-63	3
118	5	577	2	1			16	2
118	6	528	2	1	2	2	65	1
118	7	593	3	1
118	8	558	3	1
118	9	766	3	1
118	10	586	1	1	-95	1	-180	1
118	11	681	2	1	-76	1	85	2
118	12	605	1	1			171	2
118	13	394	1	1	-287	2	-40	1
118	14	434	3	1
118	15	714	3	1
118	16	364	2	1	30	3	350	1
118	17	355	2	1	22	4	100	1
118	18	455	3	1
118	19	691	2	1	-314	2	-236	1
118	20	518	2	1	-141	1	-63	2
118	21	377	1	1			-106	3
118	22	408	1	1	-110	2	-75	2
118	23	444	1	1	-79	3	-39	1
118	24	483	3	1
118	25	509	3	1
118	26	523	2	1	-129	2	-14	1
118	27	503	2	1	-109	1	6	2
118	28	394	1	1	-211	1	-174	3
118	29	605	2	1	-38	1	-37	2
118	30	567	1	1			-1	1
118	31	568	3	1
118	32	517	1	1	-88	3	-51	1
118	33	483	1	1	-122	4	-5	1
118	34	488	3	1
118	35	459	3	1
118	36	441	3	1
118	37	454	3	1
118	38	392	2	1	26	1	62	1
118	39	418	1	1	-4	1	-143	2
118	40	422	2	1			139	1
118	41	561	3	1
118	42	509	1	1	59	1	-52	1
118	43	450	2	1			79	1
118	44	529	3	1
118	45	635	3	1
118	46	520	3	1
118	47	546	3	1
118	48	464	3	1
118	49	499	1	1	-128	5	53	1
118	50	446	3	1
118	51	489	1	1	-138	3	43	1
118	52	405	1	1	-222	2	-41	2
118	53	427	1	1	-200	1	-19	3
118	54	627	2	1			-149	3
118	55	617	2	1	40	1	-139	2
118	56	657	1	1			179	1
118	57	478	3	1
118	58	469	1	1	-25	1	-9	1
118	59	494	2	1			-16	2
118	60	482	2	1	-13	2	-4	3
118	61	441	2	1	-13	2	153	3
118	62	482	2	1	-54	1	112	2
118	63	428	1	1			-166	1
118	64	594	3	1
118	65	680	1	1	172	1	86	1
118	66	508	2	1			86	2
118	68	499	2	1	181	3	95	4
118	69	425	2	1	296	3	393	5
118	70	431	2	1	290	2	387	4
118	72	721	1	1	356	1	-97	2
118	73	365	2	1			453	1
118	74	818	3	1
118	75	673	3	1
118	76	597	1	1	-146	2	-76	1
118	77	820	1	1	77	1	147	2
118	78	743	2	1	-116	1	-234	2
118	79	627	1	1			118	1
118	80	509	3	1
118	81	596	1	1	182	2	-59	1
118	82	655	3	1
118	83	414	2	1	385	2	219	1
118	84	633	3	1
118	85	799	1	1	459	1	166	1
118	86	340	2	1	244	1	210	2
118	87	584	1	1			34	1
118	88	550	3	1
118	89	613	1	1	273	3	16	1
118	90	597	3	1
118	91	526	1	1	-93	4	-156	1
118	92	682	3	1
118	93	847	1	1	228	2	208	1
118	94	639	3	1
118	95	619	2	1	282	2	20	1
118	96	688	2	1	213	1	-157	2
118	97	901	1	1			370	1
118	98	531	3	1
118	99	661	3	1
118	100	725	2	1	-85	2	19	1
118	101	744	3	1
118	102	640	1	1	1	2	-104	1
118	103	595	1	1	-44	1	-71	2
118	104	639	2	1			27	1
118	105	666	3	1
118	106	822	2	1	-214	2	-156	1
118	107	749	2	1	-141	1	-83	2
118	108	608	1	1	50	1	114	2
118	109	558	2	1			-64	1
118	110	494	3	1
118	111	598	1	1	-20	2	104	1
118	112	713	1	1	95	1	219	2
118	113	618	2	1			66	3
118	114	562	2	1	100	1	122	2
118	115	662	1	1			-22	1
118	116	684	3	1
118	117	662	2	1	0	2	53	1
118	118	715	3	1
119	1	710	1	1	-208	5	4	2
119	2	899	1	1	-19	4	193	1
119	3	706	3	1
119	4	709	3	1
119	5	632	3	1
119	6	918	2	1			-286	1
119	7	769	2	1	-143	4	-137	2
119	8	939	2	1	-313	3	-198	2
119	9	635	2	1	-9	2	106	1
119	10	741	3	1
119	11	626	1	1	-270	1	-115	1
119	12	896	2	1			-155	2
119	13	754	2	1	-128	2	-13	3
119	14	540	2	1	134	2	150	3
119	15	752	2	1	-78	1	-62	2
119	16	674	1	1			-16	1
119	17	690	3	1
119	18	741	3	1
119	19	740	2	1	-11	1	1	1
119	20	729	1	1			89	1
119	21	640	3	1
119	22	658	1	1	-82	3	18	1
119	23	826	1	1	86	4	-91	1
119	24	917	3	1
119	25	1112	1	1	478	3	201	1
119	26	911	3	1
119	27	518	1	1	-116	1	-393	1
119	28	634	2	1			107	1
119	29	741	3	1
119	30	768	1	1	134	2	56	1
119	31	712	3	1
119	32	754	1	1	-37	2	42	1
119	33	796	1	1	5	1	84	2
119	34	791	2	1			32	3
119	35	700	2	1	96	2	123	2
119	36	682	2	1	114	3	141	1
119	37	823	3	1
119	38	809	2	1	200	2	-169	1
119	39	640	3	1
119	40	1009	1	1			369	1
119	41	812	1	1	-186	3	172	2
119	42	713	1	1	-285	2	73	3
119	43	1059	1	1	61	1	424	3
119	44	998	2	1	-277	1	-363	2
119	45	721	1	1			86	1
119	46	635	3	1
119	47	1146	2	1	-103	1	-511	1
119	48	1043	1	1			409	2
119	49	692	1	1	-454	2	58	1
119	50	634	3	1
119	51	917	1	1	210	1	283	1
119	52	707	2	1			199	1
119	53	906	3	1
119	54	1008	1	1	385	1	102	1
119	55	623	2	1			283	2
119	56	715	2	1	-94	1	-259	3
119	57	621	1	1			165	2
119	59	456	3	1
119	60	773	1	1	242	1	317	1
119	61	531	2	1			153	1
119	62	684	3	1
119	63	649	2	1	124	3	35	1
119	64	771	2	1	128	3	260	1
119	65	1031	3	1
119	66	923	2	1	-24	1	108	1
119	67	899	1	1			277	2
119	68	822	1	1	-101	2	200	1
119	69	622	3	1
119	70	988	3	1
119	71	679	2	1	143	3	254	1
119	72	933	3	1
119	73	1194	3	1
119	74	722	2	1	-41	4	-33	1
119	75	689	3	1
119	76	712	3	1
119	77	545	2	1	136	1	167	1
119	78	681	1	1	-60	1	-31	2
119	79	741	2	1			1	2
119	80	484	2	1	197	2	258	1
119	81	742	3	1
119	82	744	3	1
119	83	722	1	1	-348	1	-22	1
119	84	1070	2	1			-326	2
119	85	578	2	1	-14	2	147	3
119	86	1174	2	1	-610	1	-449	2
119	87	564	1	1			-161	1
119	88	725	3	1
119	89	495	2	1	69	2	230	1
119	90	820	2	1	240	3	6	2
119	91	883	2	1	177	2	-57	1
119	92	826	3	1
119	93	1060	1	1			106	1
119	94	954	3	1
119	95	818	1	1	-70	1	-136	1
119	96	888	2	1	-34	1	-386	2
119	97	854	1	1			352	1
119	98	502	3	1
119	99	521	2	1	333	2	362	1
119	100	883	3	1
119	101	804	3	1
119	102	883	2	1	-147	2	-152	1
119	103	731	3	1
119	104	736	1	1	252	2	5	1
119	105	650	1	1	166	1	-81	2
119	106	484	2	1			247	3
119	108	1082	1	1	598	2	64	4
119	109	986	1	1	502	3	-32	3
119	111	729	1	1	245	5	-289	1
119	112	1018	3	1
119	113	678	3	1
119	114	1068	3	1
119	115	843	1	1			88	1
119	116	755	3	1
119	117	638	1	1			-139	1
119	118	777	3	1
119	119	717	1	1			-60	1
120	2	593	1	1	-31	2	63	1
120	3	530	3	1
120	4	624	2	1			-63	1
120	5	561	3	1
120	6	494	2	1	41	1	67	1
120	7	535	1	1	117	1	101	2
120	8	418	2	1			16	1
120	9	434	3	1
120	10	408	1	1	-116	1	-26	1
120	11	524	2	1			-126	2
120	12	458	2	1	-50	2	-60	1
120	13	398	3	1
120	14	413	2	1	-5	4	80	1
120	15	493	3	1
120	16	510	2	1	-55	3	-46	1
120	17	464	3	1
120	18	491	3	1
120	19	455	1	1	40	3	-86	1
120	20	541	3	1
120	21	483	1	1	68	1	-58	1
120	22	415	2	1			126	2
120	23	377	2	1	74	1	164	3
120	24	451	1	1			-90	4
120	25	461	1	1	84	2	-80	5
120	26	560	1	1	183	3
120	28	387	1	1	-84	2
120	29	532	1	1	61	1	84	5
120	30	471	2	1			-23	4
120	31	402	2	1	130	2	46	3
120	32	454	2	1	121	3	-6	2
120	33	450	2	1	125	2	-2	1
120	34	448	3	1
120	35	575	1	1	60	2	127	1
120	36	520	1	1	5	1	176	2
120	37	515	2	1			-171	1
120	38	344	3	1
120	39	604	1	1	89	2	260	1
120	40	317	1	1	-120	2	-27	2
120	41	564	1	1	127	1	220	3
120	42	437	2	1			96	3
120	43	488	2	1	-148	1	45	2
120	44	340	1	1			-193	1
120	45	533	3	1
120	46	579	3	1
120	47	481	1	1	-7	4	28	1
120	48	453	3	1
120	49	491	1	1	119	3	38	1
120	50	540	1	1	168	2	119	1
120	51	421	3	1
120	52	372	2	1			49	1
120	53	372	2	1	168	3	39	2
120	54	418	2	1	-38	4	-7	1
120	55	411	3	1
120	56	377	3	1
120	57	440	2	1	-60	1	-63	1
120	58	380	1	1			-45	1
120	59	425	3	1
120	60	432	2	1	167	2	-7	1
120	61	381	2	1	218	1	44	2
120	62	599	1	1			171	2
120	63	551	1	1	197	2	123	1
120	64	428	3	1
120	65	354	2	1	68	2	74	1
120	66	327	2	1	95	1	87	2
120	67	422	1	1			8	1
120	68	414	3	1
120	69	400	1	1	92	3	-21	1
120	70	421	3	1
120	71	396	1	1	88	1	-25	1
120	72	308	2	1	102	1	113	2
120	73	410	1	1	-18	1	-11	3
120	74	428	2	1	139	1	-7	4
120	75	567	1	1			246	5
120	76	388	1	1	-21	2	67	4
120	77	385	1	1	-24	1	64	3
120	78	409	2	1			-88	2
120	79	344	2	1	41	2	-23	1
120	80	321	3	1
120	81	339	2	1	46	4	125	1
120	82	464	3	1
120	83	388	2	1			76	1
120	84	432	2	1			-128	1
120	85	304	3	1
120	86	381	3	1
120	87	390	3	1
120	88	377	2	1	49	2	-1	1
120	89	376	3	1
120	90	426	1	1	34	1	50	1
120	91	392	2	1			-21	1
120	92	371	3	1
120	93	326	3	1
120	94	331	1	1	-61	3	5	1
120	95	330	1	1	-62	4	-5	2
120	96	394	1	1	2	5	59	1
120	97	335	3	1
120	98	449	3	1
120	99	540	1	1	46	4	36	1
120	100	504	3	1
120	101	573	1	1	79	2	34	1
120	102	539	3	1
120	103	494	2	1	-9	1	45	1
120	104	485	1	1	132	1	-54	2
120	105	353	2	1	-27	1	186	3
120	106	326	1	1	-76	1	6	3
120	107	402	2	1			-82	2
120	108	337	2	1	-11	2	-17	1
120	109	320	3	1
120	110	332	2	1	62	4	221	1
120	111	553	3	1
120	112	354	2	1	40	2	-8	1
120	113	346	3	1
120	114	394	1	1			-140	1
120	115	534	3	1
120	116	363	1	1	-191	3	-68	1
120	117	431	3	1
120	118	345	3	1
120	119	554	2	1			-209	1
121	1	523	2	1			-43	3
121	2	528	2	1			-48	2
121	3	635	2	1			-155	1
121	4	480	3	1
121	5	650	2	1			-27	1
121	6	623	3	1
121	7	437	2	1			186	1
121	8	490	2	1	207	5	93	2
121	9	468	2	1	229	4	115	1
121	10	583	3	1
121	11	404	3	1
121	12	465	2	1	232	1	-61	1
121	13	697	1	1			293	2
121	14	535	1	1	59	1	92	2
121	15	476	2	1			-33	1
121	16	443	3	1
121	17	771	1	1	295	2	328	1
121	18	567	1	1	90	2	-143	1
121	19	710	3	1
121	20	477	2	1			10	1
121	21	487	3	1
121	22	382	3	1
121	23	699	2	1	-59	1	-317	1
121	24	640	1	1	157	1	258	2
121	25	483	2	1			25	3
121	26	601	2	1	39	2	-93	2
121	27	553	2	1	103	3	-45	1
121	28	508	3	1
121	29	551	3	1
121	30	656	1	1	174	1	105	1
121	31	482	2	1	198	1	69	2
121	32	680	1	1	146	1	130	2
121	33	534	2	1			16	1
121	34	550	3	1
121	35	505	3	1
121	36	521	3	1
121	37	499	2	1	217	1	22	1
121	38	716	1	1			58	1
121	39	658	3	1
121	40	606	1	1	148	1	-52	1
121	41	458	2	1	-45	1	200	2
121	42	413	1	1			-245	3
121	43	387	1	1	-237	1	-73	3
121	44	624	2	1	-10	1	-164	2
121	45	614	1	1			154	1
121	46	460	3	1
121	47	465	1	1	-163	2	3	1
121	48	462	3	1
121	49	628	2	1	7	1	-166	1
121	50	635	1	1			173	2
121	51	699	1	1	71	2	31	2
121	52	552	1	1	24	2	-116	1
121	53	668	3	1
121	54	528	2	1	123	1	140	1
121	55	651	1	1	102	1	-4	2
121	56	549	2	1			106	1
121	57	655	3	1
121	58	457	2	1	130	2	199	1
121	59	656	3	1
121	60	587	1	1			-69	1
121	61	689	1	1	229	3	55	2
121	62	953	1	1	493	2	319	1
121	63	634	3	1
121	64	460	2	1			174	1
121	65	693	2	1	260	3	-205	1
121	66	488	3	1
121	67	447	2	1	246	3	41	1
121	68	602	2	1	91	2	-78	1
121	69	524	3	1
121	70	693	1	1			143	1
121	71	550	3	1
121	72	627	3	1
121	73	564	1	1	53	2	-63	1
121	74	573	1	1	62	1	-54	2
121	75	511	2	1			401	2
121	77	912	3	1
121	78	573	2	1	-40	2	-123	1
121	79	450	3	1
121	80	533	1	1			83	1
121	81	613	1	1	40	3	40	1
121	82	573	3	1
121	83	755	3	1
121	84	500	1	1	-92	3	-255	1
121	85	430	1	1	-162	2	-325	2
121	86	931	1	1	339	1	176	3
121	87	592	2	1			163	4
121	89	451	1	1	30	2	-183	5
121	90	627	1	1	206	1	-7	4
121	91	421	2	1			213	3
121	92	622	2	1	-211	1	12	2
121	93	411	1	1			-223	1
121	94	634	3	1
121	95	786	1	1	263	1	152	1
121	96	523	2	1			18	1
121	97	541	3	1
121	98	606	3	1
121	99	644	3	1
121	100	535	2	1	-34	1	109	1
121	101	501	1	1			-143	2
121	103	496	1	1	38	1	27	4
121	104	458	2	1	139	1	11	3
121	105	597	1	1			128	2
121	106	429	1	1	-44	2	-40	1
121	107	469	3	1
121	108	473	2	1	1	1	-4	1
121	109	474	1	1			-61	2
121	110	795	1	1	201	2	260	1
121	111	535	3	1
121	112	594	2	1			106	1
121	113	700	3	1
121	114	555	3	1
121	115	638	2	1	109	2	-83	1
121	116	643	2	1	104	1	-88	2
121	117	747	1	1			192	3
122	1	372	1	1	-42	3	-123	2
122	2	507	1	1	93	2	12	1
122	3	495	3	1
122	4	414	2	1			81	1
122	5	484	2	1	23	3	11	2
122	6	469	2	1	38	4	21	2
122	7	533	2	1	-26	5	-43	1
122	8	490	3	1
122	9	493	3	1
122	10	588	2	1	-83	4	-95	1
122	11	356	2	1	149	3	137	2
122	12	367	2	1	138	2	126	3
122	13	519	2	1	-14	1	-26	4
122	14	505	1	1	69	1	134	4
122	15	436	2	1	158	1	-65	3
122	16	594	1	1	307	1	223	2
122	17	287	2	1			84	1
122	18	371	3	1
122	19	552	2	1	42	3	-144	1
122	20	408	3	1
122	21	533	2	1	14	4	-265	1
122	22	268	3	1
122	23	486	3	1
122	24	292	2	1	255	1	194	1
122	25	547	1	1			61	2
122	26	485	1	1	192	1	37	3
122	27	293	2	1			155	2
122	28	406	2	1	79	2	42	1
122	29	448	3	1
122	30	239	3	1
122	31	478	3	1
122	33	471	3	1
122	34	297	1	1	-49	5	-108	1
122	35	405	3	1
122	36	447	1	1	101	3	42	1
122	37	284	1	1	-62	2	-121	2
122	38	371	1	1	25	1	-75	2
122	39	346	2	1			100	1
122	40	446	3	1
122	41	310	3	1
122	42	428	1	1	15	3	118	1
122	43	406	1	1	-7	2	78	1
122	44	328	3	1
122	45	413	2	1			-85	1
122	46	294	2	1	31	3	34	2
122	47	258	2	1	67	2	70	3
122	48	335	2	1	-10	1	-77	3
122	49	325	1	1			67	2
122	50	370	1	1	35	2	112	1
122	51	258	3	1
122	52	397	3	1
122	53	333	1	1	-69	1	-64	1
122	54	402	2	1	-26	1	-5	2
122	55	376	1	1			-21	3
122	56	304	1	1	-98	2	-93	4
122	57	450	1	1	48	3	53	5
122	58	256	1	1	-99	4
122	59	400	1	1	45	3
122	60	394	1	1	39	2
122	61	381	1	1	26	1
122	62	355	2	1	80	1
122	63	435	1	1			-4	5
122	64	282	1	1	-73	2	-157	4
122	65	300	1	1	-99	2	-139	3
122	66	419	1	1	20	1	-20	2
122	67	399	2	1			40	1
122	68	439	3	1
122	69	329	3	1
122	70	499	3	1
122	71	386	2	1	33	5	113	1
122	72	437	2	1	-117	5	105	2
122	73	428	2	1	-108	4	114	1
122	74	542	3	1
122	75	270	3	1
122	76	342	2	1	-22	1	-72	1
122	77	320	1	1	-92	1	-73	2
122	78	412	2	1			-19	1
122	79	393	3	1
122	80	416	3	1
122	81	500	1	1	70	2	77	1
122	82	423	3	1
122	83	430	2	1	-122	1	-7	1
122	84	308	1	1			-22	1
122	85	330	3	1
122	86	457	1	1	148	1	127	1
122	87	309	2	1	78	1	244	2
122	88	387	1	1			-166	1
122	89	553	3	1
122	90	320	2	1	67	2	233	1
122	91	302	2	1	38	3	23	1
122	92	325	3	1
122	93	351	2	1	-11	1	-26	1
122	94	340	1	1			-23	1
122	95	363	3	1
122	96	344	3	1
122	97	328	3	1
122	98	518	3	1
122	99	413	1	1	-93	3	106	1
122	100	307	3	1
122	101	286	3	1
122	102	506	2	1	-74	1	-220	1
122	103	432	1	1			80	1
122	104	352	3	1
122	105	343	3	1
122	106	340	1	1	18	2	-3	1
122	107	395	1	1	73	1	52	2
122	108	322	2	1	190	1	-9	3
122	109	512	1	1			199	2
122	110	311	1	1	-236	2	-2	1
122	111	313	3	1
122	112	547	2	1			-234	1
122	113	290	2	1	91	2	30	1
122	114	320	3	1
122	115	381	1	1			61	1
122	116	362	1	1	88	2	-166	1
122	117	528	3	1
122	118	274	2	1			254	1
122	119	427	2	1	-65	3	101	2
123	1	431	1	1	-41	1	99	3
123	2	472	2	1			-140	2
123	3	381	2	1	50	2	-49	1
123	4	332	3	1
123	5	422	2	1	29	2	-90	1
123	6	404	2	1	47	1	-72	2
123	7	451	1	1	-106	1	59	2
123	8	557	2	1			-165	1
123	9	392	3	1
123	10	349	3	1
123	11	531	2	1	-50	2	-182	1
123	12	405	2	1	76	1	-56	2
123	13	481	1	1	98	1	132	3
123	14	383	2	1			-34	4
123	15	452	2	1	-27	1	120	4
123	16	425	1	1	31	1	-147	3
123	17	394	2	1	24	1	178	2
123	18	418	1	1			-154	1
123	19	572	3	1
123	20	534	3	1
123	21	352	1	1	-182	1	-182	1
123	22	534	2	1			-52	2
123	23	396	2	1	182	2	86	1
123	24	482	3	1
123	25	578	1	1			96	1
123	26	507	1	1	59	3	25	2
123	27	467	1	1	19	2	-15	3
123	28	374	1	1	-74	1	-111	3
123	29	448	2	1	-43	1	37	2
123	30	405	1	1			-80	1
123	31	485	3	1
123	32	503	1	1	55	3	18	1
123	33	502	1	1	54	4	17	2
123	34	573	1	1	-53	5	88	3
123	35	449	1	1	-177	4	-36	2
123	36	527	1	1	-99	3	42	1
123	37	485	3	1
123	38	415	1	1	-211	1	-70	1
123	39	626	2	1			-116	1
123	40	510	3	1
123	42	499	1	1	-127	3	8	1
123	43	491	3	1
123	44	477	3	1
123	45	425	1	1	-18	5	-52	1
123	46	502	1	1	59	4	28	1
123	47	474	3	1
123	48	554	1	1	111	2	16	1
123	49	538	3	1
123	50	443	2	1	-2	2	95	1
123	51	395	2	1	46	1	10	2
123	52	441	1	1			36	1
123	53	405	3	1
123	54	472	1	1	-131	1	67	1
123	55	603	2	1			-122	1
123	56	481	3	1
123	57	443	3	1
123	58	621	3	1
123	59	353	3	1
123	60	372	2	1	121	4	-19	1
123	61	427	2	1	66	3	108	2
123	62	521	2	1	-28	2	14	1
123	63	535	3	1
123	64	493	1	1			-24	1
123	65	517	3	1
123	66	611	1	1	165	2	94	1
123	68	446	2	1			71	3
123	69	544	2	1	88	3	-145	4
123	70	537	2	1	95	2	-138	3
123	71	637	2	1	-5	1	-238	2
123	72	632	1	1			233	1
123	73	399	3	1
123	74	439	2	1	38	1	-40	1
123	75	477	1	1	150	1	0	2
123	76	327	2	1			150	1
123	77	477	3	1
123	78	494	2	1	-98	1	-17	1
123	79	396	1	1			-81	2
123	80	540	1	1	80	1	63	3
123	81	460	2	1	97	1	17	4
123	82	557	1	1			162	4
123	83	415	1	1	-218	1	20	3
123	84	633	2	1	-242	1	-238	2
123	85	391	1	1			-4	1
123	86	395	3	1
123	87	365	3	1
123	88	383	1	1	-250	4	-93	1
123	89	476	3	1
123	90	405	1	1	21	5	-100	1
123	91	505	3	1
123	92	326	3	1
123	93	465	3	1
123	94	501	3	1
123	95	384	2	1			117	1
123	96	353	2	1	55	5	182	2
123	97	578	2	1	-170	4	-43	1
123	98	535	3	1
123	99	445	3	1
123	101	408	1	1			-91	1
123	102	499	3	1
123	103	412	3	1
123	105	447	3	1
123	106	485	1	1	122	3	38	1
123	107	489	1	1	126	2	34	1
123	108	455	3	1
123	109	363	2	1			125	1
123	110	488	3	1
123	111	418	2	1	-23	1	70	1
123	112	395	1	1	-23	1	-93	2
123	113	418	2	1			31	2
123	114	529	2	1	-134	2	-80	1
123	115	449	3	1
123	116	428	2	1	-35	1	21	1
123	117	393	1	1			-56	1
123	118	449	3	1
123	119	410	3	1
124	1	546	2	1	9	1	-131	3
124	2	555	1	1	66	1	140	2
124	3	489	2	1			-74	1
124	4	415	3	1
124	5	398	3	1
124	6	426	2	1	85	4	0	1
124	7	426	3	1
124	8	442	3	1
124	9	402	3	1
124	10	511	1	1	112	2	-2	1
124	11	513	3	1
124	12	399	2	1	-10	1	114	1
124	13	389	1	1			-23	1
124	14	412	3	1
124	15	439	2	1	9	2	27	1
124	16	466	3	1
124	17	448	1	1			-18	1
124	18	418	1	1	-21	3	-51	1
124	19	469	3	1
124	20	530	3	1
124	21	508	1	1	95	1	-22	1
124	22	413	2	1			54	1
124	23	467	3	1
124	24	422	1	1	-14	2	-32	1
124	25	454	3	1
124	26	436	2	1			18	1
124	27	454	3	1
124	28	404	3	1
124	29	619	2	1	-197	5	-215	1
124	30	362	2	1			248	1
124	31	610	3	1
124	32	439	2	1	6	4	11	1
124	33	450	3	1
124	34	477	2	1	-32	2	-27	1
124	35	461	2	1	-16	1	-11	2
124	36	445	1	1	8	1	-5	3
124	37	437	2	1			13	4
124	38	513	2	1	-68	2	-81	4
124	39	423	2	1	72	2	9	3
124	40	406	2	1	89	1	26	2
124	41	495	1	1			63	1
124	42	432	3	1
124	43	466	3	1
124	44	354	1	1	-88	1	-112	1
124	45	442	2	1			24	2
124	46	387	2	1	-36	1	79	3
124	47	351	1	1	-22	1	-115	4
124	48	373	2	1			93	5
124	49	468	2	1	-70	2
124	50	569	2	1	-171	1
124	51	398	1	1	-89	1
124	52	487	2	1	-55	1	12	5
124	53	432	1	1			-67	4
124	54	464	1	1	26	1	-35	3
124	55	438	2	1			61	2
124	56	424	2	1	21	2	75	1
124	57	499	3	1
124	58	445	1	1			-54	1
124	59	404	1	1	-20	3	-61	2
124	60	453	1	1	29	4	-12	1
124	61	465	3	1
124	62	396	3	1
124	63	426	1	1	-11	5	-7	1
124	64	433	3	1
124	65	372	3	1
124	66	491	3	1
124	67	393	1	1	-44	1	-98	1
124	68	437	2	1	27	1	54	2
124	69	464	1	1	6	1	-27	3
124	70	458	2	1			-33	3
124	71	417	2	1	-64	1	8	2
124	72	353	1	1			-72	1
124	73	425	3	1
124	74	367	3	1
124	75	415	2	1	59	3	102	1
124	76	517	3	1
124	77	412	3	1
124	78	474	1	1			62	1
124	79	500	1	1	57	3	41	1
124	80	459	3	1
124	81	490	3	1
124	82	443	2	1			47	1
124	83	426	2	1	38	4	20	1
124	84	446	3	1
124	85	437	2	1	27	2	9	1
124	86	492	2	1	-28	1	-46	2
124	87	464	1	1			18	3
124	88	423	1	1	-69	2	-28	3
124	89	500	1	1	-9	3	49	2
124	90	508	1	1	-1	2	57	1
124	91	451	3	1
124	92	509	2	1	18	2	-58	1
124	93	480	2	1	47	1	-29	2
124	94	527	1	1			76	3
124	95	495	1	1	15	2	70	3
124	96	360	1	1	-120	3	-65	2
124	97	407	1	1	-40	4	-18	1
124	98	425	3	1
124	99	350	3	1
124	100	537	1	1	90	1	187	1
124	101	447	2	1			110	1
124	102	557	3	1
124	103	466	2	1	-58	1	91	1
124	104	408	1	1	-73	1	-149	2
124	105	481	2	1	-11	1	-19	3
124	106	470	1	1			8	2
124	107	377	1	1	-104	2	-85	1
124	108	462	3	1
124	109	427	1	1	-76	4	-35	1
124	110	357	1	1	-146	3	-185	2
124	111	409	1	1	-94	2	-133	1
124	112	542	3	1
124	113	503	2	1	160	2	39	1
124	114	501	2	1	162	1	41	2
124	115	663	1	1			266	2
124	116	372	1	1	-129	2	-25	1
124	117	397	3	1
124	118	474	3	1
124	119	532	3	1
124	120	480	2	1	-108	4	52	1
211	1	598	1	1	214	1	186	2
211	2	384	2	1			28	1
211	3	412	3	1
211	4	405	1	1	103	2	-7	1
211	5	368	1	1	66	1	-44	2
211	6	302	2	1	30	1	74	3
211	7	332	1	1			-44	2
211	8	411	1	1	109	2	35	1
211	9	376	3	1
211	10	426	1	1	135	2	50	1
211	11	393	1	1	102	1	27	2
211	12	291	2	1			75	1
211	13	366	3	1
211	14	338	2	1	44	2	28	1
211	15	353	2	1	29	1	25	2
211	16	382	1	1			4	1
211	17	378	3	1
211	18	270	3	1
211	19	328	3	1
211	20	337	3	1
211	21	318	1	1	25	5	-41	1
211	22	359	3	1
211	23	348	3	1
211	24	299	1	1	6	2	-49	1
211	25	328	1	1	35	1	-20	2
211	26	293	2	1			36	2
211	27	373	2	1	-45	2	-44	1
211	28	329	3	1
211	29	418	3	1
211	30	325	3	1
211	31	317	3	1
211	32	427	2	1			-110	1
211	33	298	2	1	-26	5	19	2
211	34	309	2	1	-37	4	-65	3
211	35	296	2	1	-24	3	-52	2
211	36	327	2	1	-55	2	-83	1
211	37	244	3	1
211	38	272	1	1	-99	2	-51	1
211	39	323	3	1
211	40	371	2	1	-18	1	-48	1
211	41	353	1	1			30	2
211	42	380	1	1	49	1	48	2
211	43	331	2	1			1	1
211	44	332	3	1
211	45	295	2	1	65	1	37	1
211	46	360	1	1			-41	1
211	47	401	3	1
211	48	270	1	1	-68	2	-131	1
211	49	282	1	1	-56	1	-119	2
211	50	338	2	1			-61	3
211	51	325	2	1	-43	2	-48	2
211	52	295	2	1	87	2	-18	1
211	53	277	3	1
211	54	382	1	1	77	2	105	1
211	55	295	1	1	-10	1	12	2
211	56	305	2	1			-22	1
211	57	283	3	1
211	58	324	3	1
211	59	337	1	1	17	2	54	1
211	60	283	3	1
211	61	320	2	1			-37	1
211	62	270	2	1	67	3	108	1
211	63	378	3	1
211	64	350	3	1
211	65	335	3	1
211	66	311	3	1
211	67	308	2	1	-10	4	3	1
211	68	326	2	1	-28	3	-25	1
211	69	301	3	1
211	70	335	2	1	-37	1	-34	1
211	71	298	1	1			-3	2
211	72	294	1	1	-11	1	-7	3
211	73	305	2	1	7	1	-4	4
211	74	312	1	1			-159	4
211	75	303	1	1	-121	2	-168	3
211	76	461	1	1	37	1	-10	2
211	77	424	2	1			47	1
211	78	471	3	1
211	79	353	1	1	60	2	-118	1
211	80	287	1	1	-6	1	-40	2
211	81	293	2	1			34	1
211	82	327	3	1
211	83	432	1	1	139	2	125	1
211	84	307	3	1
211	85	322	3	1
211	86	392	2	1	-92	1	-70	1
211	87	300	1	1	-284	1	-22	2
211	88	584	2	1			-276	2
211	89	344	2	1	48	2	-36	1
211	90	308	3	1
211	91	392	1	1	65	2	84	1
211	92	301	1	1	-26	1	-139	2
211	93	327	2	1			113	1
211	94	440	3	1
211	95	367	1	1	40	2	-73	1
211	96	578	1	1	283	2	138	2
211	98	295	2	1	44	2	256	1
211	99	551	3	1
211	100	339	1	1	-279	1	-212	1
211	101	618	2	1	-277	1	-325	2
211	102	341	1	1			48	1
211	103	293	3	1
211	104	316	3	1
211	105	288	2	1	22	1	28	1
211	106	310	1	1	18	1	-6	2
211	107	292	2	1			94	3
211	108	309	2	1	1	2	77	2
211	109	380	2	1	-70	3	6	1
211	110	386	3	1
211	111	260	3	1
211	112	573	2	1	-280	2	-313	1
211	113	320	2	1	-27	1	-60	2
211	114	293	1	1			71	2
211	115	420	1	1	100	2	198	1
211	116	222	3	1
211	117	308	1	1	-286	3	39	1
211	118	269	3	1
211	119	303	1	1	-291	1	34	1
211	120	594	2	1			-325	2
212	1	681	2	1	39	3	-1	2
212	2	386	2	1	334	2	294	1
212	3	680	3	1
212	4	720	1	1	282	2	40	1
212	5	691	1	1	253	1	11	2
212	6	438	2	1	214	1	242	3
212	7	652	1	1			-28	4
212	8	524	1	1	80	1	-181	4
212	9	444	2	1			261	3
212	10	475	2	1	244	1	230	2
212	11	719	1	1			14	1
212	12	705	3	1
212	13	402	2	1	270	1	303	1
212	14	672	1	1			-33	2
212	15	549	1	1	157	1	-156	3
212	16	392	2	1			35	3
212	17	626	2	1	-77	2	-199	2
212	18	641	2	1	5	2	-214	1
212	19	427	3	1
212	20	646	1	1			219	1
212	21	352	1	1	-282	2	-177	1
212	22	529	3	1
212	23	634	2	1	-85	1	-105	1
212	24	549	1	1			207	1
212	25	342	3	1
212	26	406	3	1
212	27	555	3	1
212	28	613	2	1	-127	1	-58	1
212	29	486	1	1			73	1
212	30	413	3	1
212	31	473	1	1	-203	1	60	1
212	32	676	2	1			-246	1
212	33	430	3	1
212	34	577	2	1	-26	2	-183	1
212	35	394	3	1
212	36	551	1	1	203	1	157	1
212	37	348	2	1			-6	1
212	38	342	3	1
212	39	614	1	1	53	1	272	1
212	40	561	2	1			-148	1
212	41	413	3	1
212	42	450	3	1
212	43	465	1	1	-132	2	11	1
212	44	454	3	1
212	45	597	2	1	55	2	9	1
212	46	606	3	1
212	47	652	1	1			46	1
212	48	349	1	1	-248	3	-257	2
212	49	452	1	1	-145	4	-154	3
212	50	373	1	1	-224	5	62	4
212	51	379	1	1	9	5	68	3
212	52	558	1	1	188	4	247	2
212	53	322	1	1	-48	3	11	1
212	54	311	3	1
212	55	528	1	1	158	1	217	1
212	56	370	2	1			-59	2
212	57	517	2	1	11	2	3	2
212	58	519	2	1	-35	2	1	1
212	59	520	3	1
212	60	484	1	1	60	1	-36	1
212	61	424	2	1			96	2
212	62	482	2	1	-173	1	-106	2
212	63	309	1	1			-67	1
212	64	376	3	1
212	65	468	1	1	-14	3	-29	1
212	66	497	3	1
212	67	377	1	1	-122	4	-104	1
212	68	481	3	1
212	69	652	1	1	153	2	84	1
212	70	568	3	1
212	71	499	2	1	-110	2	69	1
212	72	504	2	1	-115	1	64	2
212	73	389	1	1	-91	1	-40	3
212	74	480	2	1			-51	2
212	75	481	2	1	-92	2	-52	1
212	76	429	3	1
212	77	586	2	1	-68	1	-157	1
212	78	518	1	1	33	1	89	2
212	79	485	2	1	21	1	-56	3
212	80	506	1	1	16	1	-64	3
212	81	490	2	1			80	2
212	82	469	2	1	37	2	101	1
212	83	570	3	1
212	84	512	3	1
212	85	510	1	1	48	2	130	1
212	86	380	3	1
212	87	462	2	1			-66	1
212	88	396	3	1
212	89	456	3	1
212	90	407	3	1
212	91	420	2	1	79	1	-13	1
212	92	499	1	1			26	2
212	93	422	1	1	2	2	-51	1
212	94	473	3	1
212	95	573	1	1	-80	3	100	1
212	96	408	1	1	-245	2	-65	2
212	97	500	1	1	-153	1	-62	2
212	98	653	2	1			-91	1
212	99	562	3	1
212	100	382	3	1
212	101	559	2	1	-41	3	-178	1
212	102	381	3	1
212	103	606	3	1
212	104	518	1	1	135	1	-88	1
212	105	383	2	1			176	1
212	106	559	3	1
212	107	374	3	1
212	108	374	3	1
212	109	506	2	1	12	5	-132	1
212	110	468	2	1			-125	1
212	111	343	3	1
212	112	559	2	1	-88	4	-216	1
212	113	583	2	1	-112	3	21	1
212	114	604	3	1
212	115	591	2	1	-120	1	13	1
212	116	471	1	1			-27	1
212	117	498	3	1
212	118	627	1	1	39	1	129	1
212	119	588	2	1			-156	1
212	120	432	3	1
213	1	678	2	1	68	1	8	5
213	2	746	1	1	172	1	60	4
213	3	574	2	1	-13	1	112	3
213	4	561	1	1	-208	1	-125	2
213	5	769	2	1			-83	1
213	6	686	3	1
213	7	694	3	1
213	8	539	3	1
213	9	1272	2	1	-698	3	-707	1
213	10	565	3	1
213	11	755	2	1	-181	1	-190	1
213	12	574	1	1			-156	1
213	13	730	3	1
213	14	633	3	1
213	15	735	1	1	325	2	173	1
213	16	562	3	1
213	17	410	2	1	185	1	152	1
213	18	595	1	1			-265	1
213	19	860	3	1
213	20	527	1	1	117	3	164	1
213	21	363	3	1
213	22	681	3	1
213	23	459	1	1	-503	1	-222	1
213	24	962	2	1	-506	1	-204	2
213	25	456	1	1			-302	1
213	26	758	3	1
213	27	911	1	1	194	3	271	1
213	28	640	3	1
213	29	462	1	1	-255	1	-178	1
213	30	717	2	1			427	1
213	31	1144	3	1
213	32	798	3	1
213	33	737	2	1	-75	3	4	1
213	34	741	3	1
213	35	833	2	1	-171	1	-92	1
213	36	662	1	1			-79	2
213	37	780	1	1	-169	2	39	3
213	38	449	1	1	-500	1	-292	4
213	39	949	2	1			-208	5
213	40	719	2	1	-270	2	-103	5
213	41	781	2	1	-188	2	-165	4
213	42	535	2	1	58	1	81	3
213	43	593	1	1	125	1	-23	2
213	44	468	2	1			148	1
213	45	616	3	1
213	46	531	2	1	62	3	85	1
213	47	518	2	1	128	3	168	2
213	48	633	2	1	13	2	53	1
213	49	686	3	1
213	50	646	1	1			-40	1
213	52	605	3	1
213	53	654	1	1	21	5	-347	1
213	54	1001	3	1
213	55	753	3	1
213	56	594	1	1	-655	5	-21	1
213	57	615	3	1
213	58	547	3	1
213	59	548	1	1	-701	2	1	1
213	60	447	1	1	-802	1	-100	2
213	61	1249	2	1	-205	1	-487	2
213	62	1044	1	1			282	1
213	63	762	3	1
213	64	482	2	1	183	1	280	1
213	65	665	1	1			-97	2
213	66	822	1	1	231	1	60	3
213	67	591	2	1			293	4
213	68	919	2	1	-401	2	-35	3
213	69	820	2	1	-302	1	64	2
213	70	518	1	1			-366	1
213	71	884	3	1
213	72	584	2	1	-66	2	265	1
213	73	849	3	1
213	74	963	2	1	-153	1	-114	1
213	75	810	1	1			-39	2
213	76	1336	1	1	548	1	823	2
213	77	788	2	1			-275	1
213	78	513	3	1
213	79	769	3	1
213	81	637	1	1	-151	4	-246	2
213	82	842	1	1	54	5	-41	1
213	83	883	3	1
213	84	647	1	1			-236	1
213	85	864	1	1			252	1
213	86	612	3	1
213	87	683	1	1			71	1
213	88	615	1	1	-72	5	3	2
213	89	795	1	1	108	4	183	3
213	90	614	1	1	-73	3	2	4
213	91	470	1	1	-217	2	-86	4
213	92	859	1	1	172	1	303	3
213	93	687	2	1			-131	2
213	94	837	2	1	22	2	-281	1
213	95	556	3	1
213	96	679	2	1	533	3	-123	1
213	97	843	2	1	369	2	29	1
213	98	872	3	1
213	99	1212	1	1			217	1
213	100	995	3	1
213	101	792	3	1
213	102	691	2	1	87	1	101	1
213	103	778	1	1	-74	1	-392	2
213	104	852	2	1			318	1
213	105	1170	3	1
213	106	463	2	1	315	3	647	1
213	107	1110	3	1
213	108	743	2	1	-37	3	367	1
213	109	741	2	1	-35	2	-291	1
213	110	450	3	1
213	111	706	1	1	-29	1	256	1
213	112	735	2	1			0	1
213	113	735	3	1
213	114	824	3	1
213	115	392	1	1	-290	1	-432	1
213	116	682	2	1			142	2
213	117	419	2	1	-27	2	84	2
213	118	546	2	1	-154	3	-43	1
213	119	503	3	1
213	120	552	2	1	-160	5	-49	1
215	1	530	1	1			-3	1
215	2	533	3	1
215	3	558	3	1
215	4	517	3	1
215	5	475	1	1	-97	2	-38	1
215	6	513	3	1
215	7	572	2	1	-20	1	-59	1
215	8	552	1	1			39	2
215	9	628	1	1	56	2	186	2
215	11	442	3	1
215	12	656	3	1
215	13	458	1	1	-52	1	-198	1
[truncated: 7,969 more rows]
