# Supplementary material for: Food Palatability Directs Our Eyes Across Contexts
Source: Frontiers journal article supplement (doi:10.3389/fpsyg.2021.664893), 2021-05-31
Supplement: Data_Sheet_1.zip [file NeutralOutput_TLBSParamsFood_S1.xlsx]

## Sheet: Sheet1
SubjNum_FoodS1	traditionalBS_FoodS1	MeanTwd_FoodS1	MeanAwy_FoodS1	PeakTwd_FoodS1	PeakAwy_FoodS1	Variability_FoodS1	MeanTwdNT_FoodS1	MeanAwyNT_FoodS1	PeakTwdNT_FoodS1	PeakAwyNT_FoodS1	VariabilityNT_FoodS1	NumMatches_FoodS1	NumMatchesNT_FoodS1	MeanDist_FoodS1	MeanDistNT_FoodS1	SDDists_FoodS1	SDDistsNT_FoodS1
111	-8.3	74.381	-79.1143	279	-295	103.177	92.9231	-94.725	335	-279	123.578	56	79	1.58929	1.56962	0.781067	0.842517
112	5.78718	80.037	-67.96	254	-186	94.2707	74.5349	-71.8286	257	-182	91.7431	52	78	1.80769	1.9359	1.04859	1.2097
113	38	97.0333	-41.5556	334	-145	96.8944	63.5217	-49.3214	324	-146	83.3294	57	73	2.15789	1.64384	1.13057	1.03239
114	1.39778	146.12	-142.207	373	-462	189.645	129.744	-127.184	543	-565	175.452	54	76	1.72222	1.63158	0.855982	0.906894
115	-33.8	110.226	-111.154	300	-379	145.268	124.229	-109.045	330	-243	140.625	57	79	1.82456	1.65823	1.07109	0.945788
116	-16.4615	95.7	-114.735	324	-344	138.346	97.1795	-105.667	318	-377	127.658	54	75	1.77778	1.93333	1.12714	1.25562
117	10.3032	76.1923	-42.871	200	-184	75.5182	40.7805	-34.85	217	-188	57.9383	57	79	1.7193	1.6962	0.881443	0.924793
118	-56.6506	132.333	-134.865	417	-401	172.942	183.966	-169.082	631	-569	231.836	60	78	2.15	1.73077	1.05485	0.975985
119	-30.85	143.118	-292.68	603	-842	303.029	163.946	-167.86	663	-799	235.399	59	80	2.30508	1.6375	1.19271	0.889371
120	-28.8109	38.5909	-79.4722	115	-219	72.1043	51	-63.825	143	-246	73.098	58	76	1.75862	1.72368	0.942381	0.932362
121	79.4167	158.079	-64.8333	570	-170	164.073	194.419	-138.848	588	-358	206.279	50	76	1.82	1.76316	0.962353	0.936211
122	17.9939	72.5484	-74.9565	310	-173	100.133	66.4286	-71.3889	310	-282	94.5645	54	77	1.81481	1.66234	0.91268	0.99486
123	20.1064	66.5484	-55.08	235	-126	82.2911	69.7692	-53.7778	245	-285	83.7013	56	75	2.05357	1.73333	1.10239	1.03105
124	14.4997	83.2308	-62.5185	223	-225	94.0562	110.541	-84.7812	317	-206	125.377	52	69	1.84615	1.72464	1.07347	1.02733
211	-5.54392	92.5517	-115.429	240	-307	130.587	68.5952	-105.2	284	-354	120.626	57	77	1.96491	1.77922	0.885698	1.13118
212	-12.0342	56.7778	-94.0357	161	-253	99.3212	119.206	-103.69	507	-392	148.119	55	76	2.47273	1.78947	1.24506	1.01082
213	29.5053	246.758	-247.048	826	-778	336.265	267.195	-253.405	862	-745	344.737	54	78	1.68519	1.69231	0.820126	0.930126
215	17.6329	91.9412	-101.083	283	-290	120.892	88.6429	-101.75	290	-285	120.174	58	78	2.15517	1.5	1.19651	0.801784
216	24.2018	151.095	-95.6562	424	-301	152.991	131.811	-120	548	-315	167.442	53	77	2.0566	1.79221	1.30701	1.10427
217	19.0972	139.077	-124.231	463	-443	174.766	145.029	-116.262	397	-444	171.444	52	76	1.88462	1.52632	0.942542	0.774144
218	7.87308	65.6667	-62	179	-199	81.9239	69.1951	-72	193	-207	86.8106	57	78	2	1.9359	1.19523	1.16596
219	19.4381	98.6176	-60.9565	355	-169	108.428	101.93	-101.969	353	-292	125.234	56	75	1.76786	1.6	0.894246	0.753371
220	44.6263	95.0976	-56.3889	283	-173	93.4243	74.92	-94.8276	264	-288	101.625	59	79	1.94915	1.41772	1.19516	0.67192
221	31.9092	90	-60.8889	312	-169	106.352	107.422	-67.3333	275	-188	107.409	56	78	2.05357	1.5641	1.1508	0.815272
222	-44.5731	56.2632	-105.205	178	-310	103.214	90.3514	-118.667	297	-330	138.844	58	79	2	1.6962	1.02598	1.04212
223	25.2434	119.514	-130.619	517	-434	178.45	126.368	-131.075	472	-594	174.102	56	78	1.80357	1.5641	0.998538	0.748847
224	25.419	76.8158	-49.8947	174	-220	77.2856	74.2051	-55.7188	269	-185	89.4125	57	71	1.63158	1.84507	0.956772	1.17896
225	2.62802	103.12	-113.357	224	-450	146.013	151.795	-133.778	525	-498	185.215	53	75	2.26415	1.77333	1.25807	1.0852
226	-10.4184	130.552	-152.24	477	-381	178.865	135.14	-159.121	365	-475	176.654	53	76	1.60377	1.67105	0.862457	0.943584
311	41.9	105.854	-91.4	319	-339	121.653	97.2	-101.417	405	-433	142.074	56	80	1.66071	1.675	0.858684	0.99078
313	40.1707	133.057	-129.458	404	-371	165.297	122.375	-100.973	464	-419	151.55	58	77	2.03448	1.48052	1.09168	0.680758
314	16.2821	65.2941	-43.65	273	-227	83.6222	64.2955	-53.3714	235	-196	81.9099	53	78	1.81132	1.78205	0.941697	1.00191
315	35.4368	142.077	-110	364	-326	159.182	135.909	-129.353	479	-322	166.023	54	78	1.77778	1.64103	1.02178	0.953113
316	3.28205	89.3939	-75.5217	304	-301	110.772	54.8723	-80.0968	211	-340	89.894	56	78	2.07143	1.64103	1.18869	0.953113
317	-15.9	40.1667	-73.6923	218	-356	87.0715	63.175	-81.8947	267	-343	102.531	56	78	1.75	1.62821	0.939052	0.927347
318	0.482895	52.2667	-69.5	134	-266	80.8915	61.625	-91.75	220	-288	103.884	56	76	1.94643	1.76316	1.06889	1.09384
319	-28.6586	63.5217	-125.258	132	-327	119.384	122.091	-111.78	395	-436	153.85	52	74	2.15385	1.64865	1.25846	0.999074
320	2.95	49.7714	-58.3462	119	-158	64.9383	53.381	-77.0882	163	-263	88.6399	61	75	2.01639	1.86667	1.13272	1.08221
321	31.3329	89.7941	-55.7826	252	-286	98.3066	90.4318	-85.2941	271	-262	110.195	57	78	1.87719	1.67949	1.0534	0.860287
324	16.1795	67.975	-66.9375	243	-307	87.417	77.6744	-82.8824	260	-334	102.672	56	77	1.76786	1.68831	1.00889	1.05456
325	-17.8684	106.848	-176.5	256	-653	197.371	188.475	-206.194	678	-676	259.637	55	76	1.98182	1.73684	0.990528	1.03754
326	26.125	90.7222	-99.72	395	-311	131.689	128.575	-119.333	449	-422	172.901	61	78	1.62295	1.94872	0.859533	1.20494
327	-3.03851	91.2667	-97	264	-303	120.76	95.1143	-82.8293	320	-296	118.442	55	76	2.03636	1.78947	1.10493	1.06227
411	-29.5783	146.905	-139.207	388	-378	174.98	121.525	-145.514	335	-515	172.658	50	76	2.16	1.68421	1.18425	0.982657
412	6.43718	109.538	-130.094	251	-424	148.19	113.087	-118.182	390	-301	147.011	58	79	1.94828	1.62025	1.08292	0.895914
413	-25.575	98.4828	-123.344	355	-295	136.939	98.5122	-123.179	308	-323	140.211	61	80	2.13115	1.7125	1.25798	1.03354
414	-2.55	74.5333	-69.4348	179	-269	93.8664	93.3243	-73.6571	297	-225	107.879	53	72	1.88679	1.88889	1.17113	1.16951
415	36.966	114.27	-87.6087	337	-180	126.671	102.979	-91.3636	283	-323	125.139	60	79	1.86667	1.62025	1.0328	0.773003
416	22.5145	117.586	-82.04	530	-242	137.757	107.974	-80.65	357	-268	124.63	54	78	1.96296	1.74359	1.04544	1.04987
417	5.40486	126.812	-129.2	450	-392	168.272	131.865	-150.225	472	-453	194.908	52	76	1.88462	1.86842	1.16575	1.0626
418	13.2192	65.9677	-48.963	204	-200	77.5534	67.0513	-78.45	201	-208	90.1738	58	79	1.7931	1.64557	0.893615	0.947845
419	-14.2581	83.2069	-87.0769	307	-255	113.789	92.8182	-75.1818	290	-309	111.919	54	77	1.85185	1.46753	1.05343	0.640403
420	-14.8237	96.8	-138.212	319	-354	150.957	107.054	-98.1429	391	-303	136.02	58	79	1.89655	1.8481	0.985681	1.14454
421	0.098862	122.793	-118.889	540	-468	189.872	91.5	-111.579	466	-471	148.849	56	72	2.14286	1.66667	1.25667	0.978645
422	62.9936	267.833	-190.571	781	-475	283.838	257.167	-227.353	892	-835	314.734	51	70	1.86275	1.82857	1.0958	1.06283
423	-14.4795	93.5833	-104.074	427	-414	142.039	79.9375	-132.333	444	-572	148.906	51	71	2.17647	1.80282	1.21171	1.16643
424	22.8406	135	-149.36	552	-479	188.483	184.143	-183.184	573	-632	248.701	53	73	1.83019	1.45205	0.955467	0.667522
511	19.5853	103.536	-68.6429	261	-219	107.031	92.2857	-91.7568	264	-318	113.2	56	79	1.67857	1.72152	0.83355	0.946474
512	16.0724	156.68	-113.968	455	-331	170.327	109.514	-101.714	498	-536	147.353	56	77	1.78571	1.81818	0.908831	1.0479
513	-12.2778	245.65	-229.929	577	-684	306.568	143.194	-173.049	501	-526	212.887	48	72	2	1.52778	1.14854	0.711519
514	42.7794	118.636	-62.5455	407	-176	126.172	118.244	-67.8611	340	-217	118.513	55	77	1.90909	1.49351	1.04124	0.821157
515	-16.9	90.3571	-87.3214	267	-219	114.04	103.3	-93.1667	492	-348	137.221	56	80	1.91071	1.45	0.995933	0.727402
516	19.675	99.9189	-106.667	256	-264	124.393	101.5	-71.9	260	-269	106.255	58	80	2.13793	1.5	1.0165	0.763072
517	-27.2331	100.278	-95.35	221	-299	113.318	105.176	-91.8837	405	-255	127.036	58	77	1.91379	1.72727	1.06433	0.868095
519	6.83738	75.3704	-85.12	189	-231	100.987	72.8378	-70.6579	199	-182	90.3343	52	75	2.07692	1.57333	1.11753	0.841063
520	11.5026	77.0588	-89.1739	259	-248	111.157	120.289	-133.927	473	-533	184.43	57	78	1.78947	1.73077	1.01307	1.07719
521	-8.17949	66.25	-102.4	253	-226	101.442	69.359	-92.6	262	-236	103.151	53	78	1.62264	1.4359	0.739709	0.63634
522	43.8429	193.324	-161.783	660	-461	225.479	191.548	-190.622	661	-544	241.324	57	79	1.75439	1.74684	0.931219	1.01865
523	10.225	76.3784	-55.625	200	-216	82.4642	57.3846	-60.2143	170	-217	79.5793	61	80	1.93443	2.0125	0.997812	1.22726
524	-8.74157	77.0526	-83.4062	234	-304	100.345	72.5	-120.487	291	-342	125.028	51	74	2.11765	1.85135	1.17724	1.13092
525	17.7462	129.737	-119.182	445	-400	152.561	145.243	-107.1	522	-413	172.554	60	75	2.1	1.74667	1.10008	1.10397
611	13.6637	88.4286	-98.1739	265	-224	112.319	101.023	-123.161	296	-330	134.469	51	74	1.86275	1.7973	0.938501	1.07244
612	96.8647	182.848	-138.652	647	-363	211.99	184.872	-156.094	593	-553	230.486	56	79	1.85714	1.60759	0.903097	0.791262
613	7.90132	97.3333	-86.5312	249	-209	112.141	74.5833	-93.3667	248	-293	108.334	59	78	2.11864	1.53846	1.26061	0.750624
614	55.425	140.195	-103.889	389	-343	148.686	113.143	-90.1515	359	-269	126.975	59	75	1.79661	1.89333	0.846487	1.23653
615	27.7	276.697	-251.607	757	-839	330.784	256.405	-240.093	751	-1028	321.34	61	80	1.98361	1.5375	1.07225	0.77857
616	3.64872	48.359	-69.2381	175	-166	72.4639	50.0889	-50.0294	157	-185	65.6553	59	79	1.69492	1.62025	0.793383	0.881488
617	22.7455	105.065	-85.6071	413	-205	126.393	81.8	-74.5946	224	-230	103.388	59	75	1.76271	1.62667	0.953017	0.983284
618	-33.5936	105.522	-130.25	447	-306	149.787	103.412	-96.0227	440	-244	125.174	59	78	1.9322	1.73077	1.09646	1.01512
619	11.525	77.5882	-79.875	187	-264	97.7128	76.3421	-68.641	211	-262	92.7664	58	76	1.84483	1.76316	1.05634	1.15318
621	16.575	97.4857	-98.5714	306	-247	123.584	104.31	-76.2162	248	-263	113.672	56	79	2.125	1.77215	1.30819	1.1317
622	23.2213	77.8611	-70.15	260	-161	89.0857	78.0476	-80.7778	225	-209	97.3096	56	77	1.67857	1.81818	0.811444	0.942104
623	18.875	96.5278	-78.9	299	-202	109.736	82.4359	-67.8293	343	-256	99.2636	56	80	1.89286	1.525	0.984952	0.728706
624	2.43455	179.192	-201.038	453	-541	247.05	198.8	-221.314	711	-787	277.065	51	75	1.68627	1.62667	0.836426	1.04975
625	-19.5385	95.8333	-102.727	285	-293	126.328	98.3846	-110.9	343	-282	130.93	57	78	1.98246	1.60256	1.06051	0.842688
