# Supplementary material for: Food Palatability Directs Our Eyes Across Contexts
Source: Frontiers journal article supplement (doi:10.3389/fpsyg.2021.664893), 2021-05-31
Supplement: Data_Sheet_1.zip [file NeutraloutputTrialLevel_Food_S1.xlsx]

## Sheet: Sheet1
111	240	315	3	1
111	241	257	2	1	-10	3	58	1
111	242	252	2	1	-5	2	103	1
111	243	355	3	1
111	244	247	1	1	-44	2	-279	1
111	245	526	3	1
111	246	291	2	1	34	1	235	1
111	247	325	1	1			-201	2
111	248	273	1	1	-228	1	-7	2
111	249	501	2	1			-221	1
111	250	280	3	1
111	251	276	2	1	44	3	4	1
111	252	303	2	1	17	2	-23	2
111	253	397	2	1	-77	1	-117	3
111	254	320	1	1	-51	1	61	4
111	255	371	2	1	135	1	-112	3
111	256	506	1	1			247	2
111	257	312	1	1	-59	2	53	1
111	258	259	3	1
111	259	303	3	1
111	260	251	3	1
111	261	385	3	1
111	262	264	1	1	-22	2	-71	1
111	263	335	3	1
111	264	286	2	1			49	1
111	265	419	2	1	-155	3	-127	2
111	266	335	2	1	-57	3	-43	1
111	267	292	3	1
111	268	320	2	1	-42	1	-28	1
111	269	278	1	1	-207	1	-14	2
111	270	485	2	1			-17	3
111	271	340	2	1	-38	1	128	2
111	272	302	1	1			-166	1
111	273	468	3	1
111	274	382	3	1
111	275	327	2	1	-46	2	55	1
111	276	336	2	1	-55	1	102	2
111	277	281	1	1			-157	1
111	278	438	3	1
111	279	263	3	1
111	280	299	3	1
111	281	314	2	1	-10	1	-15	1
111	282	304	1	1			7	1
111	283	297	3	1
111	284	284	3	1
111	285	381	3	1
111	286	295	2	1	29	1	86	1
111	287	324	1	1			-57	2
111	288	305	1	1	2	1	5	2
111	289	303	2	1			-3	1
111	290	300	3	1
111	291	578	2	1	-295	2	-278	1
111	292	357	2	1	-74	1	-62	2
111	293	283	1	1			-12	1
111	294	295	3	1
111	295	400	2	1	-55	1	-105	1
111	296	345	1	1	-40	1	50	2
111	297	385	2	1	-82	1	31	2
111	298	303	1	1			-113	1
111	299	416	3	1
111	300	293	1	1	-14	1	-123	1
111	301	307	2	1	48	1	26	2
111	302	355	1	1			22	1
111	303	333	3	1
111	304	315	1	1	11	3	39	1
111	305	276	3	1
111	306	358	3	1
111	307	304	2	1			-16	1
111	308	288	3	1
111	309	294	2	1	-41	2	66	1
111	310	360	3	1
111	311	253	1	1	-21	1	-107	1
111	312	274	2	1			145	2
111	313	475	2	1	-76	2	-56	1
111	314	419	3	1
111	315	399	1	1			100	1
111	316	299	3	1
111	317	277	3	1
111	318	286	1	1	-53	4	10	1
111	319	276	3	1
111	320	289	3	1
111	321	247	3	1
111	322	339	2	1	32	2	-92	1
111	323	461	2	1	-90	1	-214	2
111	324	371	1	1			-165	3
111	325	330	1	1	20	1	-206	2
111	326	310	2	1			226	1
111	327	536	3	1
111	328	323	2	1	-44	1	213	1
111	329	279	1	1			-70	1
111	330	349	3	1
111	331	341	1	1	-211	2	-8	1
111	332	311	1	1	-241	1	-213	2
111	333	552	2	1			-28	1
111	334	524	3	1
111	335	257	2	1	157	1	267	1
111	336	414	1	1			70	1
111	337	344	3	1
111	338	412	1	1	23	3	68	1
111	339	530	1	1	141	2	166	1
111	340	364	3	1
111	341	389	2	1	-107	1	-25	1
111	342	282	1	1	-76	1	-82	2
111	343	358	2	1	-32	1	-75	3
111	344	326	1	1			43	2
111	345	295	1	1	-63	2	12	1
111	346	283	3	1
111	347	357	1	1	30	3	74	1
111	348	346	1	1	19	2	63	2
111	349	606	1	1	279	1	335	2
111	350	327	2	1			-56	1
111	351	271	3	1
111	352	274	2	1	100	2	125	1
111	353	399	3	1
111	354	374	1	1	110	1	-25	1
111	355	264	2	1	148	1	135	2
111	356	412	1	1	51	1	13	3
111	357	361	2	1	132	1	38	4
111	358	493	1	1			94	5
111	359	313	1	1	-48	2
112	240	339	1	1	43	4	-29	1
112	241	368	3	1
112	242	240	3	1
112	243	388	3	1
112	244	296	2	1	37	1	92	1
112	245	333	1	1			-55	2
112	246	277	1	1	-10	2	-125	3
112	247	296	1	1	9	1	-106	2
112	248	287	2	1			115	1
112	249	402	3	1
112	250	347	2	1	-106	2	-47	1
112	251	300	3	1
112	252	241	1	1	-78	1	-59	1
112	253	319	2	1			-11	1
112	254	308	3	1
112	255	389	1	1	70	2	81	1
112	256	373	1	1	54	3	75	2
112	257	355	1	1	136	4	57	1
112	258	298	3	1
112	259	226	1	1	7	2	-72	1
112	260	307	1	1	88	1	9	2
112	261	219	2	1			79	3
112	262	439	2	1	-163	1	-138	4
112	263	276	1	1			-25	3
112	264	308	1	1	70	1	7	2
112	265	238	2	1			63	1
112	266	301	3	1
112	267	393	2	1	-69	3	-136	1
112	268	257	3	1
112	269	313	3	1
112	270	324	1	1	-48	1	11	1
112	271	372	2	1			-35	1
112	272	337	3	1
112	273	330	2	1	-26	2	7	1
112	274	437	2	1	-133	1	-100	2
112	275	304	1	1	-18	1	-33	3
112	276	322	2	1			15	4
112	277	295	2	1	9	2	36	5
112	278	295	2	1	81	3	36	4
112	279	364	2	1	12	2	-33	3
112	280	279	2	1	97	1	52	2
112	281	376	1	1			45	1
112	282	331	3	1
112	283	407	2	1	136	1	-76	1
112	284	543	1	1			168	1
112	285	375	3	1
112	286	296	1	1	-143	1	-79	1
112	287	439	2	1			-130	1
112	288	309	3	1
112	289	272	2	1	43	3	34	1
112	290	306	3	1
112	291	313	3	1
112	292	315	1	1	-56	1	2	1
112	293	371	2	1	37	1	-23	2
112	294	408	1	1			60	1
112	295	348	3	1
112	296	364	3	1
112	297	326	2	1	82	3	115	1
112	298	441	3	1
112	299	271	2	1	-4	2	170	1
112	300	306	2	1	-39	1	30	2
112	301	267	1	1			-69	1
112	302	336	3	1
112	303	285	3	1
112	304	351	3	1
112	305	518	3	1
112	306	336	1	1	-30	1	-182	1
112	307	366	2	1			152	2
112	308	310	2	1	26	2	208	3
112	309	361	2	1	-34	2	157	4
112	310	261	2	1	66	1	257	5
112	311	327	1	1
112	312	352	1	1	118	1	152	5
112	313	234	2	1			-34	4
112	314	307	2	1	-82	2	-107	3
112	315	253	2	1	-28	1	-53	2
112	316	225	1	1			25	1
112	317	200	3	1
112	318	337	3	1
112	319	364	2	1	-123	3	-60	1
112	320	304	3	1
112	321	211	3	1
112	322	241	1	1	-64	1	30	1
112	323	305	2	1	-3	1	-94	2
112	324	302	1	1			91	3
112	325	365	1	1	85	1	154	4
112	326	280	2	1	74	1	27	5
112	327	354	1	1			47	4
112	328	299	1	1	-7	2	-8	3
112	329	341	1	1	35	1	34	2
112	330	306	2	1			1	1
112	331	307	3	1
112	332	367	3	1
112	333	519	2	1	-186	1	-152	1
112	334	333	1	1			-34	2
112	335	498	1	1	254	1	199	2
112	336	244	2	1			55	1
112	337	299	3	1
112	338	485	1	1	241	2	61	1
112	339	424	3	1
112	340	358	1	1	114	4	-66	1
112	341	381	1	1	137	5	47	2
112	343	334	3	1
112	344	431	1	1			116	1
112	345	315	3	1
112	346	380	3	1
112	347	279	1	1			30	1
112	348	249	3	1
112	349	366	1	1	-101	4	-69	1
112	350	435	3	1
112	351	350	1	1	-117	2	-85	1
112	352	436	1	1	-31	1	-34	2
112	353	467	2	1			3	1
112	354	470	3	1
112	355	467	3	1
112	356	410	3	1
112	357	345	3	1
112	358	420	2	1			-75	1
112	359	425	2	1			-80	2
113	241	372	1	1	4	4	55	2
113	242	353	1	1	-15	3	36	1
113	243	317	3	1
113	244	329	3	1
113	245	368	2	1			6	1
113	246	374	3	1
113	247	311	2	1	194	2	63	1
113	248	313	2	1	192	1	-19	2
113	249	505	1	1			211	1
113	250	294	3	1
113	251	363	2	1	-72	2	-83	1
113	252	280	3	1
113	253	291	1	1	-27	1	11	1
113	254	318	2	1			-56	2
113	255	334	2	1	-43	2	-72	1
113	256	262	3	1
113	257	365	2	1	-92	4	-103	1
113	258	281	2	1	-8	3	25	1
113	259	306	3	1
113	260	330	3	1
113	261	273	1	1	14	3	-127	1
113	262	400	3	1
113	263	322	3	1
113	264	259	2	1	47	3	63	1
113	265	257	2	1	49	2	-3	1
113	266	254	3	1
113	267	306	1	1	40	1	52	1
113	268	266	2	1			85	2
113	269	324	2	1	-18	2	27	1
113	270	351	3	1
113	271	337	3	1
113	272	318	1	1	1	3	-19	1
113	273	375	1	1	58	2	38	2
113	274	350	1	1	33	1	13	3
113	275	317	2	1			20	4
113	276	331	2	1	272	2	55	4
113	277	331	2	1	272	1	55	3
113	278	603	1	1			217	2
113	279	284	1	1	-44	2	-102	1
113	280	386	3	1
113	281	328	2	1	49	1	58	1
113	282	377	1	1			62	1
113	283	315	3	1
113	284	348	3	1
113	285	352	1	1	54	1	4	1
113	286	298	2	1			0	1
113	287	298	3	1
113	288	304	3	1
113	289	325	1	1	27	3	12	1
113	290	313	3	1
113	291	293	1	1	-6	5	-16	1
113	292	309	3	1
113	293	633	1	1	334	3	324	1
113	294	462	1	1	163	2	146	1
113	295	316	3	1
113	296	299	2	1	43	1	17	1
113	297	342	1	1			51	1
113	298	291	3	1
113	299	340	1	1	-37	1	49	1
113	300	377	2	1			-86	2
113	301	315	2	1	138	2	-24	3
113	302	318	2	1	135	1	-27	4
113	303	453	1	1			162	5
113	304	362	1	1	-15	1
113	305	377	2	1	62	1
113	306	439	1	1
113	307	435	1	1	87	2
113	308	376	1	1	28	1
113	309	348	2	1
113	310	465	2	1	-48	2
113	311	363	2	1	54	1	-51	5
113	312	417	1	1			105	4
113	313	517	1	1	171	2	205	3
113	314	299	1	1	-47	1	-13	2
113	315	346	2	1			-34	1
113	316	312	3	1
113	317	319	3	1
113	318	391	3	1
113	319	456	2	1	-145	4	-146	1
113	320	310	3	1
113	321	332	2	1	-21	2	-16	1
113	322	316	3	1
113	323	311	1	1	-30	1	-5	1
113	324	341	2	1			-18	1
113	325	323	3	1
113	326	325	2	1	-14	3	15	1
113	327	340	3	1
113	328	294	3	1
113	329	299	3	1
113	330	295	3	1
113	331	323	1	1	-8	1	28	1
113	332	331	2	1			-36	2
113	333	282	2	1	84	1	38	2
113	334	366	1	1			46	1
113	335	320	3	1
113	336	295	3	1
113	337	324	1	1	-47	2	22	1
113	338	302	3	1
113	339	371	2	1	-69	1	-69	1
113	340	302	1	1			7	1
113	341	295	3	1
113	342	375	1	1	4	3	80	1
113	343	554	1	1	183	4	246	2
113	344	343	1	1	-28	5	35	1
113	345	308	3	1
113	346	339	1	1	-15	4	31	1
113	347	302	1	1	-52	3	-6	2
113	348	325	1	1	-29	2	17	3
113	349	270	1	1	-84	1	-100	3
113	350	354	2	1			16	2
113	351	414	2	1	-77	2	-44	1
113	352	370	3	1
113	353	337	1	1	71	2	18	1
113	354	319	3	1
113	355	266	2	1			53	1
113	356	368	2	1	-31	3	-44	2
113	357	289	2	1	48	4	35	1
113	358	324	3	1
113	359	386	2	1			-62	1
113	360	316	2	1			8	2
114	234	367	3	1
114	235	329	1	1	-5	1	-38	1
114	236	334	2	1			164	2
114	237	519	2	1	-190	2	-21	1
114	238	498	3	1
114	239	532	3	1
114	240	568	2	1	-166	2	-166	1
114	241	402	3	1
114	242	402	1	1			0	1
114	243	432	1	1	12	2	30	2
114	244	414	1	1	-6	1	-87	3
114	245	420	2	1	41	1	81	2
114	246	461	1	1			-40	1
114	247	501	3	1
114	248	391	3	1
114	249	454	2	1	185	3	-63	1
114	250	374	2	1	265	2	111	1
114	251	485	3	1
114	252	639	1	1	21	2	222	1
114	253	417	3	1
114	254	618	2	1	-241	1	-201	1
114	255	377	1	1			-40	2
114	256	561	1	1	-57	2	120	2
114	257	542	1	1	-3	2	101	1
114	258	441	3	1
114	259	545	2	1			-176	1
114	260	369	3	1
114	261	370	2	1	244	1	-1	1
114	262	614	1	1			245	2
114	263	454	1	1	88	1	13	2
114	264	366	2	1			75	1
114	265	441	3	1
114	266	454	1	1	27	1	13	1
114	267	427	2	1			27	1
114	268	454	3	1
114	269	423	3	1
114	270	554	3	1
114	271	514	2	1	23	2	40	1
114	272	595	2	1	-58	1	-41	2
114	273	537	1	1			-17	3
114	274	603	1	1	157	2	227	4
114	275	544	1	1	98	1	168	3
114	276	446	2	1	-57	1	-70	2
114	277	389	1	1			13	1
114	278	376	3	1
114	280	500	3	1
114	281	570	1	1	208	4	70	1
114	282	438	1	1	76	3	-128	1
114	283	566	3	1
114	284	536	3	1
114	285	362	2	1	326	1	174	1
114	286	688	1	1			152	2
114	287	878	1	1	373	1	543	2
114	288	505	2	1			-170	1
114	289	335	3	1
114	290	641	3	1
114	291	441	1	1	-73	3	-174	1
114	292	615	3	1
114	293	496	1	1	-18	1	-119	1
114	294	514	2	1			101	2
114	295	808	2	1	-339	1	-193	3
114	296	469	1	1			-146	4
114	297	515	1	1	-6	2	-9	5
114	298	693	1	1	172	1	169	4
114	299	521	2	1			3	3
114	301	432	1	1	-89	2	-92	1
114	302	524	3	1
114	303	431	3	1
114	305	844	2	1	-414	4	-465	1
114	306	379	3	1
114	307	498	3	1
114	308	600	2	1	-170	1	-102	1
114	309	430	1	1			-68	2
114	310	635	1	1	35	2	204	2
114	311	594	1	1	255	3	163	1
114	312	431	3	1
114	313	497	1	1	158	1	66	1
114	314	339	2	1			130	1
114	315	469	3	1
114	316	416	2	1	81	3	53	1
114	317	482	2	1	-14	3	-128	1
114	318	354	3	1
114	319	424	2	1	44	1	-70	1
114	320	468	1	1	-20	1	114	2
114	321	488	2	1	333	1	246	3
114	322	821	1	1			87	2
114	323	692	1	1	204	2	-42	1
114	324	734	3	1
114	325	482	3	1
114	326	608	2	1	-323	3	-141	1
114	327	467	3	1
114	328	388	2	1	-103	1	79	1
114	329	285	1	1	-205	1	-182	2
114	330	490	2	1	-77	1	488	2
114	331	413	1	1			-565	1
114	332	978	3	1
114	333	430	2	1	-17	2	218	1
114	334	648	3	1
114	335	582	2	1	-120	1	66	1
114	336	462	1	1			-186	2
114	337	481	1	1	-62	1	65	3
114	338	543	2	1			-127	2
114	339	399	2	1	82	2	17	1
114	340	416	3	1
114	341	415	3	1
114	342	758	3	1
114	343	723	2	1	-308	2	-287	1
114	344	436	3	1
114	345	415	1	1	-462	1	-21	1
114	346	877	2	1	-332	1	-275	2
114	347	545	1	1			-57	1
114	348	602	3	1
114	349	400	2	1	145	2	202	1
114	350	734	2	1	-189	3	-125	1
114	351	609	3	1
115	240	412	1	1			-13	1
115	241	425	3	1
115	242	535	1	1	62	4	196	1
115	243	339	3	1
115	244	507	1	1	34	2	106	1
115	245	401	3	1
115	246	473	2	1			27	1
115	247	500	3	1
115	248	507	2	1	-85	2	-7	1
115	249	452	2	1	-30	1	-100	2
115	250	422	1	1			70	1
115	251	352	3	1
115	252	461	1	1	20	2	109	1
115	253	497	1	1	56	1	145	2
115	254	441	2	1	-15	1	141	2
115	255	426	1	1			-156	1
115	256	582	3	1
115	257	586	3	1
115	258	607	2	1	-92	3	-133	1
115	259	474	3	1
115	260	571	3	1
115	261	515	1	1	-3	1	-56	1
115	262	518	2	1	72	1	53	2
115	263	590	1	1	161	1	-92	3
115	264	429	2	1	118	1	253	2
115	265	547	1	1			-135	1
115	266	682	3	1
115	267	467	3	1
115	268	660	2	1	-113	3	-193	1
115	269	573	2	1	-26	2	-106	2
115	270	559	2	1	-12	1	-92	3
115	271	547	1	1	-53	1	183	3
115	272	600	2	1			-236	2
115	273	596	2	1	-204	2	-232	1
115	274	364	3	1
115	275	392	1	1	-215	1	28	1
115	276	607	2	1			-243	2
115	277	542	2	1	12	2	-178	3
115	278	556	2	1	-2	1	-192	4
115	279	554	1	1			190	5
115	280	646	1	1	281	1
115	281	365	2	1	171	1	208	5
115	282	536	1	1	27	1	-37	4
115	283	509	2	1	43	1	64	3
115	284	552	1	1			-21	2
115	285	499	1	1	-10	2	-74	1
115	286	573	3	1
115	287	506	1	1	101	1	-67	1
115	288	405	2	1			18	1
115	289	423	3	1
115	290	418	2	1	-20	2	30	1
115	291	448	3	1
115	292	398	1	1			-50	1
115	293	344	1	1	-74	3	-104	2
115	294	332	1	1	-86	4	-183	2
115	295	319	1	1	-99	5	-196	1
115	296	515	3	1
115	297	502	1	1	165	5	-13	1
115	298	505	1	1	168	4	37	1
115	299	468	3	1
115	300	436	3	1
115	301	549	3	1
115	302	337	2	1	295	1	212	1
115	303	632	1	1	236	1	230	2
115	304	396	2	1			6	1
115	305	402	3	1
115	306	485	1	1	89	2	83	1
115	307	503	1	1	-149	2	-222	1
115	308	725	3	1
115	309	652	2	1			73	1
115	310	395	2	1	5	2	330	2
115	311	579	2	1	-179	1	-14	2
115	312	400	1	1			-165	1
115	313	565	3	1
115	314	590	1	1	94	1	25	1
115	315	496	2	1			126	1
115	316	622	3	1
115	317	570	3	1
115	318	593	3	1
115	319	518	2	1	204	2	46	1
115	320	564	3	1
115	321	722	1	1			248	1
115	322	474	3	1
115	323	374	1	1	-342	3	-206	1
115	324	580	3	1
115	325	658	3	1
115	326	716	2	1	32	2	-58	1
115	327	448	2	1	300	1	210	2
115	328	748	1	1	147	1	36	2
115	329	601	2	1			111	1
115	330	712	3	1
115	331	537	1	1	117	1	-175	1
115	332	420	2	1			292	2
115	333	802	2	1	-379	2	-90	3
115	334	481	2	1	-58	1	-20	3
115	335	423	1	1			-38	2
115	336	359	1	1	-122	2	-102	1
115	337	461	3	1
115	338	523	1	1	42	4	-178	1
115	339	701	3	1
115	340	524	3	1
115	341	457	3	1
115	342	539	3	1
115	343	692	2	1	-257	2	-153	1
115	344	529	2	1	-94	1	-35	2
115	345	435	1	1			-59	1
115	346	494	3	1
115	347	699	1	1	66	1	205	1
115	348	633	2	1			-55	2
115	349	673	2	1	26	2	-95	1
115	350	578	3	1
115	351	514	2	1	53	2	64	1
115	352	738	2	1	-171	1	-142	2
115	353	567	1	1			-29	1
115	354	596	3	1
115	355	676	1	1	27	1	80	1
115	356	649	2	1			-53	2
115	357	483	2	1	193	2	113	3
116	240	651	2	1	-207	1	-93	2
116	241	444	1	1			-114	1
116	242	558	3	1
116	243	407	2	1	37	2	151	1
116	244	489	2	1	-102	2	69	2
116	245	395	2	1	-8	1	163	3
116	246	387	1	1	10	1	-171	4
116	247	377	2	1			181	5
116	248	563	2	1	-186	1	-218	5
116	249	377	1	1			32	4
116	250	413	1	1	-56	1	68	3
116	251	469	2	1	-69	1	-124	2
116	252	400	1	1			55	1
116	253	345	3	1
116	254	466	3	1
116	255	453	3	1
116	256	378	2	1	74	3	75	1
116	257	503	2	1	-51	2	-80	1
116	258	423	3	1
116	259	452	1	1	54	1	29	1
116	260	398	2	1	47	1	25	2
116	261	445	1	1	5	1	22	3
116	262	440	2	1	-27	1	-17	4
116	263	413	1	1			-10	5
116	264	387	1	1	-129	2
116	265	475	1	1	-41	1	-50	5
116	266	516	2	1	-82	1	9	4
116	267	434	1	1			-91	3
116	268	644	1	1	195	1	119	2
116	269	449	2	1			76	1
116	270	525	3	1
116	271	427	2	1	-18	2	49	1
116	272	476	3	1
116	273	409	1	1	-19	1	-67	1
116	274	428	2	1			318	1
116	275	746	3	1
116	276	489	3	1
116	277	533	3	1
116	278	417	2	1	-8	5	87	1
116	279	504	3	1
116	280	467	3	1
116	281	623	3	1
116	282	622	2	1	-251	2	126	1
116	283	748	3	1
116	284	371	1	1	-180	1	-377	1
116	285	551	2	1			-84	2
116	286	377	2	1	-6	2	90	1
116	287	467	3	1
116	288	489	2	1	-105	1	-22	1
116	289	384	1	1			-49	1
116	290	433	3	1
116	291	518	2	1	-69	1	-85	1
116	292	449	1	1			-186	1
116	293	635	3	1
116	294	499	3	1
116	295	541	1	1	84	3	42	1
116	296	418	1	1	-39	2	-81	2
116	297	626	1	1	169	1	246	2
116	298	457	2	1			-77	1
116	299	380	3	1
116	300	356	2	1	20	3	24	1
116	301	327	2	1	49	2	87	1
116	302	414	3	1
116	303	376	1	1	-302	1	-38	1
116	304	678	2	1	-163	1	-125	2
116	305	515	1	1			-38	1
116	306	553	3	1
116	307	477	3	1
116	308	532	3	1
116	309	341	1	1	-337	5	-177	1
116	310	518	3	1
116	311	534	3	1
116	312	533	1	1			214	1
116	313	319	3	1
116	314	531	1	1	75	4	212	1
116	315	443	1	1	-13	3	-31	1
116	316	474	3	1
116	317	400	3	1
116	318	456	2	1	-155	2	-56	1
116	319	398	2	1	-97	1	2	2
116	320	301	1	1	-219	1	-99	3
116	321	520	2	1			-109	3
116	322	525	2	1	-91	1	-114	2
116	323	434	1	1			23	1
116	324	411	3	1
116	325	472	3	1
116	326	616	1	1	195	1	144	1
116	327	421	2	1			51	2
116	328	359	2	1	257	2	156	2
116	329	416	2	1	70	2	99	1
116	330	515	3	1
116	331	486	1	1			-29	1
116	332	431	1	1	15	3	-32	1
116	333	463	3	1
116	334	740	1	1	324	5	72	1
116	335	668	3	1
116	336	708	3	1
116	337	433	1	1	-91	4	-116	1
116	338	549	3	1
116	339	339	3	1
116	340	563	1	1	39	1	224	1
116	341	524	2	1			-185	2
116	342	645	2	1	-246	1	-306	3
116	343	399	1	1			60	4
116	345	471	1	1	-344	1
116	346	815	2	1
116	347	537	2	1	-78	1	-95	5
116	348	459	1	1			17	4
116	349	498	1	1	-44	2	56	3
116	350	640	1	1	98	1	198	2
116	351	542	2	1			-100	1
116	352	442	3	1
116	353	413	2	1	97	2	29	1
116	354	578	2	1	-68	1	-158	2
116	355	510	1	1			90	1
116	356	420	3	1
116	357	585	3	1
116	358	534	3	1
117	240	287	2	1			68	1
117	241	355	3	1
117	242	259	3	1
117	243	245	3	1
117	244	314	3	1
117	245	296	2	1	-34	4	-19	1
117	246	277	3	1
117	247	288	3	1
117	248	280	2	1	-18	1	8	1
117	249	262	1	1			-48	2
117	250	327	1	1	47	2	17	1
117	251	310	3	1
117	252	293	3	1
117	253	312	3	1
117	254	260	2	1	39	2	52	1
117	255	281	2	1	18	1	31	2
117	256	299	1	1	3	1	24	3
117	257	296	2	1			-21	2
117	258	295	2	1	4	2	-20	1
117	259	275	3	1
117	260	270	3	1
117	261	246	1	1	-27	2	-30	1
117	262	276	3	1
117	263	273	2	1	128	1	3	1
117	264	401	1	1			157	1
117	265	244	3	1
117	266	276	3	1
117	267	280	1	1	-135	3	-47	1
117	268	327	3	1
117	269	339	1	1	-76	1	12	1
117	270	415	2	1			-105	2
117	271	351	2	1	-10	2	-41	1
117	272	310	3	1
117	273	341	1	1	54	2	31	1
117	274	276	1	1	-11	1	-34	2
117	275	287	2	1	-7	1	-66	3
117	276	280	1	1	-5	1	59	2
117	277	285	2	1			-64	1
117	278	221	3	1
117	279	265	2	1	34	1	-44	1
117	280	299	1	1	54	1	69	2
117	281	245	2	1			-15	1
117	282	230	3	1
117	283	262	2	1	-12	2	25	1
117	284	287	3	1
117	285	250	1	1			-37	1
117	286	249	1	1	-4	2	-9	1
117	287	258	3	1
117	288	253	2	1	-9	2	5	1
117	289	245	2	1	-1	1	0	2
117	290	244	1	1			-1	1
117	291	245	3	1
117	292	277	3	1
117	293	287	2	1	-43	3	-10	1
117	294	283	2	1	60	3	-19	2
117	295	259	2	1	84	2	5	1
117	296	264	3	1
117	297	343	1	1	75	2	79	1
117	298	284	1	1	16	1	-25	2
117	299	268	2	1			41	1
117	300	309	3	1
117	301	254	3	1
117	302	249	2	1	176	3	1	1
117	303	250	3	1
117	304	310	3	1
117	305	425	1	1	99	2	115	1
117	306	281	1	1	-45	1	-29	2
117	307	326	2	1			-16	3
117	308	306	2	1	-48	2	4	4
117	309	326	2	1	-68	1	-55	4
117	310	258	1	1			-13	3
117	311	277	1	1	-49	2	6	2
117	312	267	1	1	-58	3	-4	1
117	313	271	3	1
117	314	275	1	1	-50	1	4	1
117	315	325	2	1			-54	2
117	316	265	2	1	-7	1	6	3
117	317	258	1	1			-27	4
117	318	302	1	1	-42	1	17	3
117	319	344	2	1	-24	1	-59	2
117	320	320	1	1			35	1
117	321	285	3	1
117	322	262	3	1
117	323	262	3	1
117	324	266	2	1	-41	2	-4	1
117	325	255	2	1	-30	1	7	2
117	326	225	1	1			-37	3
117	327	299	1	1	44	1	37	4
117	328	255	2	1	200	1	-17	4
117	329	455	1	1	173	1	217	3
117	330	282	2	1			-44	2
117	331	276	2	1	-45	2	-38	1
117	332	238	3	1
117	333	231	1	1			-7	1
117	334	245	1	1	-31	3	13	1
117	335	232	3	1
117	336	256	1	1	-97	2	-115	1
117	337	371	3	1
117	338	353	2	1	-27	2	18	1
117	339	250	2	1	76	1	121	2
117	340	326	1	1	92	1	89	3
117	341	234	2	1	93	1	3	2
117	342	327	1	1			90	1
117	343	237	3	1
117	344	244	2	1	132	2	-7	1
117	345	261	2	1	115	1	-24	2
117	346	376	1	1	-91	1	97	3
117	347	467	2	1	-184	1	-188	2
117	348	283	1	1			4	1
117	349	279	3	1
117	350	251	3	1
117	351	256	2	1	87	2	87	1
117	352	343	3	1
117	353	343	1	1			0	1
117	354	296	1	1	40	3	10	1
117	355	286	3	1
117	356	294	1	1	38	5	5	1
117	357	289	3	1
117	358	288	1	1			-1	1
118	238	440	1	1	-13	1
118	239	453	2	1	17	1	-80	5
118	240	470	1	1			97	4
118	241	331	1	1	-134	2	-42	3
118	242	628	1	1	163	1	255	2
118	243	465	2	1			-92	1
118	244	373	3	1
118	245	409	1	1	15	1	36	1
118	246	394	2	1			52	2
118	247	604	2	1	-195	2	-158	1
118	248	446	3	1
118	249	566	3	1
118	250	694	2	1	-185	1	-128	1
118	251	509	1	1			-569	2
118	252	629	1	1	182	2	-449	1
118	253	1078	3	1
118	254	447	2	1			631	1
118	255	652	2	1	-23	3	-247	2
118	256	924	2	1	-295	4	-519	1
118	257	405	3	1
118	258	573	2	1	-7	3	-52	1
118	259	521	3	1
118	260	505	3	1
118	261	566	1	1			61	1
118	262	395	1	1	33	3	-110	2
118	263	427	1	1	65	2	-381	3
118	264	335	1	1	-27	1	-473	2
118	265	362	2	1			446	1
118	266	808	3	1
118	267	787	3	1
118	268	416	1	1	-260	2	-371	1
118	269	376	1	1	-300	1	-411	2
118	270	676	2	1			111	3
118	271	872	2	1	-401	2	-85	4
118	272	581	2	1	-110	1	-151	4
118	273	471	1	1			41	3
118	274	653	1	1	72	2	223	2
118	275	566	1	1	39	3	136	1
118	276	430	3	1
118	277	422	1	1	-105	1	-8	1
118	278	527	2	1	-48	1	220	2
118	279	479	1	1			-268	1
118	280	747	3	1
118	281	669	2	1	-190	2	78	1
118	282	479	2	1	0	3	-60	2
118	283	712	2	1	-233	4	-293	1
118	284	419	3	1
118	285	643	3	1
118	286	431	3	1
118	287	495	2	1	-95	2	-64	1
118	288	460	2	1	-60	1	-29	2
118	289	400	1	1			-31	3
118	290	285	1	1	-325	2	-81	4
118	291	368	1	1	-242	1	2	3
118	292	610	2	1	-54	1	-244	2
118	293	556	1	1			190	1
118	294	366	3	1
118	295	447	1	1	-163	3	-53	1
118	296	500	3	1
118	297	430	1	1	-268	2	-70	1
118	298	342	1	1	-356	1	-158	2
118	299	698	2	1			-198	3
118	300	444	2	1	-102	2	149	3
118	301	397	2	1	398	3	196	2
118	302	378	2	1	417	2	215	1
118	303	593	3	1
118	304	795	1	1	75	2	202	1
118	305	490	1	1	-230	1	-103	2
118	306	720	2	1	-60	1	-381	3
118	307	660	1	1	291	1	321	2
118	308	369	2	1			-30	1
118	309	339	3	1
118	310	514	2	1	146	3	-175	1
118	311	479	2	1	181	4	-140	2
118	312	482	2	1	62	5	-143	3
118	313	381	2	1	163	4	2	3
118	314	384	2	1	160	3	-1	2
118	315	438	2	1	106	2	-55	1
118	316	383	3	1
118	317	544	1	1			38	1
118	318	506	3	1
118	319	347	1	1	-136	3	-310	1
118	320	657	3	1
118	321	459	3	1
118	322	483	2	1	114	2	-102	1
118	323	381	3	1
118	324	597	1	1	168	2	216	1
118	325	326	1	1	-103	1	-61	2
118	326	429	2	1			-42	1
118	327	387	3	1
118	328	366	1	1	-63	2	-554	1
118	329	920	3	1
118	330	435	3	1
118	331	429	2	1	-63	3	452	1
118	332	881	3	1
118	333	408	2	1	137	2	-17	1
118	334	391	3	1
118	335	545	1	1			154	1
118	336	507	1	1	99	3	76	1
118	337	431	3	1
118	338	338	1	1	-1	5	-33	1
118	339	371	3	1
118	340	296	1	1	-43	3	-99	1
118	341	395	3	1
118	342	343	3	1
118	343	339	2	1	-5	2	467	1
118	344	806	3	1
118	345	334	1	1			-45	1
118	346	379	3	1
118	347	363	3	1
118	348	388	2	1	-54	3	-85	1
118	349	303	3	1
118	350	371	2	1	73	2	107	1
118	351	478	3	1
118	352	444	1	1	-41	1	-34	1
118	353	485	2	1			161	1
118	354	646	3	1
119	241	884	2	1			-338	5
119	242	606	2	1			-60	4
119	243	571	2	1	40	5	-25	3
119	244	597	2	1	14	4	-51	2
119	245	577	2	1	34	3	-31	1
119	246	546	3	1
119	247	570	3	1
119	248	611	1	1	106	2	41	1
119	249	552	1	1	47	1	-18	2
119	250	505	2	1			-8	2
119	251	686	2	1	46	2	-189	1
119	252	497	3	1
119	253	732	1	1			146	1
119	254	586	3	1
119	255	566	3	1
119	256	707	3	1
119	257	685	1	1	67	5	128	1
119	258	557	3	1
119	259	665	3	1
119	260	574	3	1
119	261	415	1	1	-203	1	-159	1
119	262	618	2	1			64	2
119	263	825	2	1	-16	2	-143	1
119	264	682	3	1
119	265	809	1	1			127	1
119	266	774	1	1	-51	3	-11	2
119	267	525	1	1	40	3	-260	1
119	268	785	3	1
119	269	627	1	1	142	1	-158	1
119	270	485	2	1			98	1
119	271	583	3	1
119	272	582	1	1	97	2	-27	1
119	273	609	3	1
119	274	595	1	1	41	3	-14	1
119	275	524	1	1	-30	2	122	1
119	276	402	3	1
119	277	554	2	1			29	1
119	278	583	3	1
119	279	594	3	1
119	280	560	2	1	168	4	34	1
119	281	845	2	1	-117	3	-454	1
119	282	391	3	1
119	283	582	2	1	146	1	-191	1
119	284	728	1	1			42	1
119	285	686	3	1
119	286	667	3	1
119	287	660	2	1	68	3	7	1
119	288	434	2	1	252	3	105	1
119	289	539	3	1
119	290	656	2	1	30	1	-117	1
119	291	686	1	1			6	2
119	292	713	1	1	57	2	33	1
119	293	680	3	1
119	294	580	1	1	-481	4	-4	1
119	295	584	3	1
119	296	548	1	1	-513	2	-36	1
119	297	331	1	1	-730	1	-253	2
119	298	1061	2	1			-477	3
119	299	519	2	1	-188	2	57	3
119	300	926	2	1	-595	3	-350	2
119	301	841	2	1	-335	3	-265	1
119	302	576	3	1
119	303	470	3	1
119	304	506	1	1	-763	1	36	1
119	305	1269	2	1	-842	1	-799	2
119	306	427	1	1			62	3
119	307	522	1	1	-747	2	157	2
119	308	1028	1	1	603	3	663	1
119	309	365	3	1
119	310	459	3	1
119	311	425	2	1			34	1
119	312	537	2	1	491	4	-78	2
119	313	524	2	1	-2	5	385	3
119	314	466	2	1	56	4	443	2
119	315	521	2	1	1	3	388	1
119	316	909	3	1
119	317	722	2	1	-200	1	187	1
119	318	522	1	1	-129	1	-387	2
119	319	651	2	1	-241	1	-99	2
119	320	410	1	1			-142	1
119	321	552	3	1
119	322	766	2	1	-285	1	-214	1
119	323	481	1	1			-71	2
119	324	800	1	1	395	2	363	3
119	325	389	1	1	-16	1	-48	2
119	326	405	2	1			32	1
119	327	437	3	1
119	328	471	1	1	66	2	34	1
119	329	448	1	1	43	3	-188	2
119	330	498	1	1	-146	4	-138	1
119	331	636	3	1
119	332	483	3	1
119	334	644	2	1	477	1	-161	2
119	335	1121	1	1			638	3
119	336	475	1	1	-169	2	-59	4
119	337	516	1	1	44	2	-18	3
119	338	431	1	1	-41	1	-103	2
119	339	472	2	1			62	1
119	340	534	3	1
119	341	460	1	1	-130	1	-74	1
119	342	590	2	1	9	1	-56	2
119	343	599	1	1	135	1	65	3
119	344	464	2	1			95	3
119	345	520	2	1	79	2	39	2
119	346	772	2	1	53	2	-213	1
119	347	559	3	1
119	348	825	1	1			266	1
119	349	897	1	1	125	3	411	1
119	350	486	3	1
119	351	503	1	1	-347	4	-398	1
119	352	901	3	1
119	353	379	3	1
119	354	517	3	1
119	355	850	2	1	17	3	-333	1
119	356	408	2	1	459	2	167	1
119	357	575	3	1
119	358	867	1	1	418	1	292	1
119	359	449	2	1			208	1
119	360	657	3	1
120	240	390	2	1	-77	3
120	241	360	2	1	-47	2
120	242	382	2	1	-69	1
120	243	313	1	1	-13	1	13	5
120	244	326	2	1			-26	4
120	245	343	2	1	-10	1	-43	3
120	246	333	1	1			33	2
120	247	292	1	1	-51	2	-8	1
120	248	300	3	1
120	249	311	3	1
120	250	329	1	1	-1	1	18	1
120	251	330	2	1			36	1
120	252	366	3	1
120	253	399	3	1
120	254	322	3	1
120	255	363	2	1	-81	3	16	1
120	256	379	3	1
120	257	366	2	1	-84	1	13	1
120	258	282	1	1			-3	1
120	259	285	3	1
120	260	382	3	1
120	261	343	2	1	92	2	39	1
120	262	320	2	1	115	1	-28	2
120	263	435	1	1			143	1
120	264	292	3	1
120	265	393	3	1
120	266	274	2	1	96	2	119	1
120	267	348	2	1	22	1	45	2
120	268	370	1	1			13	2
120	270	357	3	1
120	271	330	2	1	40	3	10	1
120	272	340	3	1
120	273	273	3	1
120	274	422	2	1	-197	2	-123	1
120	275	299	3	1
120	276	225	1	1			-101	1
120	277	326	3	1
120	278	256	1	1	-79	1	-70	1
120	279	335	2	1			-46	1
120	280	289	3	1
120	281	388	1	1	53	2	99	1
120	282	339	1	1	4	3	50	2
120	283	261	1	1	-140	3	-28	3
120	284	354	1	1	-47	2	14	3
120	285	351	1	1	-50	1	11	2
120	286	401	2	1			-61	1
120	287	340	3	1
120	288	356	3	1
120	289	320	2	1	31	4	36	1
120	290	291	2	1	18	4	65	2
120	291	307	2	1	2	3	120	2
120	292	346	2	1	-37	2	81	1
120	293	427	3	1
120	294	309	1	1	-50	2	-103	1
120	295	412	3	1
120	296	359	2	1	-48	1	53	1
120	297	311	1	1			-101	2
120	298	303	1	1	-56	2	-66	2
120	299	294	1	1	-65	3	-75	1
120	300	369	3	1
120	301	305	3	1
120	302	313	1	1	-101	5	-163	1
120	303	476	3	1
120	304	367	3	1
120	305	264	1	1	-150	2	-34	1
120	306	298	3	1
120	307	414	2	1	-78	2	-116	1
120	308	449	2	1	-113	1	-195	2
120	309	336	1	1			82	1
120	310	254	3	1
120	311	328	1	1	-32	3	74	1
120	312	394	1	1	34	2	89	1
120	313	305	3	1
120	314	360	2	1	40	1	-55	1
120	315	400	1	1			95	2
120	316	325	1	1	1	1	26	3
120	317	324	2	1	-17	1	-25	2
120	318	307	1	1			8	1
120	319	299	3	1
120	320	268	3	1
120	321	312	2	1	9	2	-44	1
120	322	309	2	1	12	1	-41	2
120	323	321	1	1	-219	1	27	3
120	324	540	2	1	-124	1	-246	2
120	325	416	1	1			122	1
120	326	294	3	1
120	327	319	2	1	-64	2	-25	1
120	328	385	2	1	-130	1	-91	2
120	329	255	1	1	-45	1	-39	3
120	330	300	2	1	59	1	10	4
120	331	359	1	1			49	3
120	332	281	1	1	19	1	-29	2
120	333	262	2	1			48	1
120	334	310	3	1
120	335	353	3	1
120	336	412	3	1
120	337	374	3	1
120	338	284	3	1
120	339	372	2	1	-74	2	-88	1
120	340	429	2	1	-131	1	-101	2
120	341	298	1	1			-30	1
120	342	328	3	1
120	343	296	1	1	-81	2	-32	1
120	344	301	1	1	-76	1	-27	2
120	345	377	2	1			-49	3
120	346	349	2	1	29	1	-29	4
120	347	378	1	1	75	1	58	3
120	348	303	2	1	49	1	17	2
120	349	352	1	1			32	1
120	350	320	3	1
120	351	323	3	1
120	352	336	2	1	9	1	-13	1
120	353	345	1	1	40	1	-32	2
120	354	305	2	1			72	1
120	355	377	3	1
120	356	434	2	1	-119	1	-57	1
120	357	315	1	1			-62	2
120	358	329	1	1	-105	2	-48	3
121	236	987	1	1	433	3	588	2
121	237	454	1	1	-100	2	55	1
121	238	399	3	1
121	239	554	2	1			-155	1
121	240	437	2	1	17	3	10	1
121	241	447	3	1
121	242	435	3	1
121	243	465	2	1	-45	3	222	1
121	244	687	3	1
121	245	448	2	1	-28	1	239	1
121	246	420	1	1			-267	2
121	247	539	1	1	91	2	-148	3
121	248	726	1	1	254	2	39	4
121	249	670	1	1	198	1	-201	4
121	250	472	2	1			399	3
121	251	468	2	1	202	2	403	2
121	253	871	3	1
121	254	572	1	1	56	1	-299	1
121	255	516	2	1			355	2
121	256	483	2	1	159	1	388	3
121	257	642	1	1			199	4
121	258	497	1	1	52	1	54	3
121	259	445	2	1	-11	1	-2	2
121	260	434	1	1			-9	1
121	261	443	3	1
121	262	421	2	1	13	2	22	1
121	263	563	2	1	7	2	-42	1
121	264	521	3	1
121	265	570	1	1	8	1	49	1
121	266	562	2	1			-67	1
121	267	495	3	1
121	268	421	3	1
121	269	368	1	1	-110	1	-53	1
121	270	478	2	1			-57	2
121	271	728	2	1	-43	1	-272	3
121	272	685	1	1	205	1	229	2
121	273	480	2	1			-24	1
121	274	456	3	1
121	275	406	2	1	74	2	242	1
121	276	648	3	1
121	277	480	1	1	14	1	-168	1
121	278	466	2	1			182	2
121	279	397	2	1	48	2	236	3
121	280	529	2	1	-84	1	104	2
121	281	445	1	1			-188	1
121	282	633	3	1
121	283	482	2	1	62	2	151	1
121	284	432	2	1	112	1	147	2
121	285	544	1	1			-35	1
121	286	579	3	1
121	287	740	2	1	-76	1	-161	1
121	288	664	1	1			12	1
121	289	652	3	1
121	290	603	1	1	159	1	-49	1
121	291	444	2	1			147	2
121	292	553	2	1	36	2	38	1
121	293	591	3	1
121	294	589	1	1	66	2	-216	1
121	295	805	3	1
121	296	523	2	1	244	2	282	1
121	298	767	1	1			229	1
121	299	538	3	1
121	300	371	3	1
121	301	884	3	1
121	302	801	3	1
121	303	871	3	1
121	304	485	2	1	132	1	386	1
121	305	617	1	1			171	1
121	306	446	3	1
121	307	815	1	1	330	3	368	1
121	308	447	3	1
121	309	522	3	1
121	310	654	3	1
121	311	722	2	1	229	4	-68	1
121	312	490	2	1	461	3	164	2
121	313	532	2	1	419	2	122	3
121	314	508	2	1	443	1	75	4
121	315	951	1	1			368	3
121	316	563	1	1	55	2	-20	2
121	317	470	1	1	-38	3	-113	1
121	318	583	3	1
121	319	542	3	1
121	320	365	1	1			-177	1
121	321	389	1	1			-358	2
121	322	403	1	1			-344	1
121	323	747	3	1
121	326	922	1	1	286	2	175	3
121	327	584	1	1	-52	1	181	4
121	328	636	2	1			-233	3
121	329	582	2	1	2	2	-179	2
121	330	515	2	1	69	3	-112	1
121	331	403	3	1
121	332	453	3	1
121	333	563	3	1
121	334	433	1	1	29	2	-130	1
121	335	383	1	1	-21	1	-180	2
121	336	404	2	1	570	1	75	2
121	337	974	1	1			495	1
121	338	479	3	1
121	339	607	3	1
121	340	447	3	1
121	341	579	3	1
121	342	507	1	1	75	1	-72	1
121	343	432	2	1	267	1	147	2
121	344	699	1	1			200	3
121	345	479	1	1	72	1	-20	2
121	346	407	2	1			92	1
121	347	499	3	1
121	348	486	3	1
121	349	649	2	1	-170	4	-163	1
121	350	421	2	1	58	5	65	2
121	351	530	2	1			155	2
121	352	585	2	1			100	1
121	353	685	3	1
121	354	407	3	1
122	239	329	2	1	16	4	-81	1
122	240	248	3	1
122	241	309	2	1	36	2	-12	1
122	242	297	3	1
122	243	345	1	1	58	2	47	1
122	244	298	3	1
122	245	287	2	1	118	1	11	1
122	246	405	1	1			77	2
122	247	307	1	1	20	2	-21	1
122	248	328	3	1
122	249	467	3	1
122	250	324	3	1
122	251	289	2	1	27	1	35	1
122	252	316	1	1	27	1	-8	2
122	253	289	2	1			17	2
122	254	292	2	1	24	2	14	1
122	255	306	3	1
122	256	471	2	1	-155	4	-176	1
122	257	295	3	1
122	258	457	2	1	-165	4	-176	1
122	259	281	3	1
122	260	249	3	1
122	261	363	3	1
122	262	292	1	1			-182	1
122	263	474	3	1
122	264	341	3	1
122	265	393	1	1	38	4	83	1
122	266	310	3	1
122	267	277	1	1	-78	2	-33	1
122	268	305	1	1	-50	1	-51	2
122	269	355	2	1			1	1
122	270	356	3	1
122	271	377	1	1	22	2	97	1
122	272	280	3	1
122	273	343	1	1	-49	1	63	1
122	274	392	2	1			-67	2
122	275	292	2	1	51	2	33	1
122	276	325	3	1
122	277	428	2	1	-91	1	-103	1
122	278	337	1	1			12	2
122	279	473	1	1	45	2	127	2
122	280	311	1	1	-71	2	-35	1
122	281	346	3	1
122	282	382	2	1	26	2	-67	1
122	283	315	3	1
122	284	408	1	1			88	1
122	285	320	3	1
122	286	525	1	1	245	1	205	1
122	287	280	2	1	53	1	40	2
122	288	333	1	1	-77	1	13	3
122	289	410	2	1			-90	4
122	290	291	2	1	42	2	92	4
122	291	305	2	1	280	2	78	3
122	292	369	2	1	216	1	14	2
122	293	585	1	1			202	1
122	294	383	3	1
122	295	239	2	1	59	2	144	1
122	296	387	2	1	-89	1	-4	2
122	297	298	1	1			-49	2
122	298	312	1	1	-75	2	-35	1
122	299	347	3	1
122	300	348	3	1
122	301	339	3	1
122	302	350	1	1			11	1
122	303	299	1	1			-282	1
122	304	581	3	1
122	305	400	3	1
122	306	312	1	1	29	3	-88	1
122	307	319	1	1	36	2	-81	2
122	308	267	1	1	-16	1	-154	2
122	309	283	2	1			138	1
122	310	421	3	1
122	311	285	3	1
122	312	331	2	1	105	1	-46	1
122	313	436	1	1			83	2
122	314	287	1	1	-44	2	-66	1
122	315	353	3	1
122	316	277	1	1	-66	2	-76	1
122	317	310	1	1	-33	1	-43	2
122	318	343	2	1			16	3
122	319	267	2	1	55	1	92	2
122	320	322	1	1			-37	1
122	321	359	3	1
122	322	303	2	1	19	2	104	1
122	323	407	3	1
122	324	464	2	1	19	1	-57	1
122	325	483	1	1			75	1
122	326	408	3	1
122	327	309	2	1	-2	1	99	1
122	328	307	1	1			-101	2
122	329	307	1	1	-28	1	-101	3
122	330	335	2	1			73	4
122	331	369	2	1	-104	1	39	5
122	332	265	1	1	-52	1	-30	5
122	333	317	2	1			-22	4
122	334	296	2	1	-31	2	-1	3
122	335	283	2	1	-18	3	12	2
122	336	283	2	1	111	4	12	1
122	337	295	3	1
122	338	325	2	1	69	2	-6	1
122	339	319	3	1
122	340	394	1	1			75	1
122	341	593	1	1	310	2	310	1
122	342	283	3	1
122	343	283	2	1	43	1	0	1
122	344	326	1	1			35	1
122	345	291	3	1
122	346	313	3	1
122	347	304	3	1
122	348	315	2	1	10	2	-11	1
122	349	285	2	1	40	1	19	2
122	350	325	1	1	-132	1	46	2
122	351	457	2	1			-178	1
122	352	279	3	1
122	353	284	1	1	-173	2	5	1
122	354	332	1	1	-125	3	53	2
123	237	343	3	1
123	238	342	3	1
123	239	423	2	1	-76	5	-81	1
123	240	423	2	1	-76	4	-47	1
123	241	376	3	1
123	242	388	3	1
123	243	473	2	1	-126	1	-85	1
123	244	347	1	1			60	1
123	245	287	3	1
123	246	448	1	1	109	3	161	1
123	247	313	1	1	-26	2	-47	1
123	248	360	3	1
123	249	339	2	1	-16	2	21	1
123	250	363	2	1	-40	1	97	2
123	251	323	1	1			-137	1
123	252	460	3	1
123	253	423	1	1	86	3	-37	1
123	254	421	1	1	84	2	-39	2
123	255	462	1	1	125	1	2	3
123	256	337	2	1			45	4
123	257	413	2	1	-66	1	-31	3
123	258	347	1	1			-35	2
123	259	398	1	1	45	2	16	1
123	260	382	3	1
123	261	353	2	1			29	1
123	262	342	2	1	10	2	40	2
123	263	421	2	1	-69	1	-39	3
123	264	352	1	1	1	1	45	4
123	265	351	2	1			-44	3
123	266	331	2	1	6	1	-24	2
123	267	337	1	1			30	1
123	268	307	3	1
123	269	384	2	1	-47	2	57	1
123	270	441	3	1
123	271	344	2	1	-7	4	92	1
123	272	436	3	1
123	273	315	3	1
123	274	339	3	1
123	275	458	3	1
123	276	359	1	1	15	5	-99	1
123	277	430	1	1			120	2
123	278	428	1	1			118	1
123	279	310	3	1
123	280	361	1	1	-42	4	51	1
123	281	419	1	1	16	3	98	2
123	282	476	1	1	73	2	155	1
123	283	321	3	1
123	284	403	2	1	-8	2	-82	1
123	285	352	2	1	43	1	-24	2
123	286	395	1	1			67	1
123	287	328	3	1
123	288	414	3	1
123	289	372	2	1	20	1	42	1
123	290	392	1	1			-22	2
123	291	317	1	1	-55	2	5	2
123	292	557	1	1	138	3	245	1
123	293	312	3	1
123	294	354	3	1
123	295	419	2	1	-102	1	-65	1
123	296	317	1	1			-57	2
123	297	423	1	1	4	2	49	1
123	298	374	3	1
123	299	362	3	1
123	300	329	2	1	72	3	33	1
123	301	337	2	1	64	2	25	2
123	302	457	2	1	-56	1	-84	3
123	303	401	1	1			28	2
123	304	372	1	1	-85	2	-1	1
123	305	373	3	1
123	306	358	1	1	5	2	48	1
123	307	310	3	1
123	308	353	2	1			62	1
123	309	415	3	1
123	310	369	3	1
123	311	349	1	1	18	3	-5	1
123	312	354	3	1
123	313	366	3	1
123	314	331	2	1			191	1
123	315	522	3	1
123	316	519	3	1
123	317	355	2	1	45	1	164	1
123	318	400	1	1			-4	2
123	319	341	1	1	11	2	-63	1
123	320	404	3	1
123	321	330	2	1	10	1	74	1
123	322	340	1	1			-64	2
123	323	477	1	1	91	2	73	3
123	324	398	1	1	12	1	-6	4
123	325	386	2	1			18	5
123	326	353	2	1	-34	2
123	327	287	2	1	32	1
123	328	319	1	1	-123	1
123	329	442	2	1
123	330	407	2	1	-88	2	-42	5
123	331	400	2	1	-64	3	-35	4
123	332	357	2	1	-21	2	8	3
123	333	401	2	1	-65	1	-36	2
123	334	336	1	1			-29	1
123	335	365	3	1
123	336	370	1	1	10	3	5	1
123	337	345	1	1	-15	2	-20	2
123	338	590	1	1	230	1	221	3
123	339	360	2	1			9	2
123	340	654	2	1	-64	2	-285	1
123	341	369	3	1
123	343	329	2	1	235	5	-14	1
123	344	315	3	1
123	345	487	3	1
123	346	364	2	1	200	2	33	1
123	347	397	3	1
123	348	564	1	1			-80	1
123	349	644	3	1
123	350	563	1	1	171	1	-81	1
123	351	392	2	1	-6	1	-90	2
123	352	386	1	1			84	1
123	353	302	3	1
123	354	304	2	1	82	2	-2	1
124	241	374	2	1	144	2	2	4
124	242	495	2	1	23	1	-119	3
124	243	518	1	1			142	2
124	244	379	1	1	-61	2	3	1
124	245	376	3	1
124	246	440	2	1			-104	1
124	247	336	3	1
124	248	518	3	1
124	249	375	3	1
124	250	507	3	1
124	251	416	3	1
124	252	478	3	1
124	253	381	2	1	135	1	97	1
124	254	516	1	1	77	1	38	2
124	255	439	2	1			161	3
124	256	359	2	1	70	1	241	2
124	257	429	1	1			-171	1
124	258	600	3	1
124	259	394	1	1	0	1	-206	1
124	260	394	2	1			206	2
124	261	470	2	1	-4	1	-14	2
124	262	466	1	1			10	1
124	263	456	3	1
124	264	408	1	1	15	2	-152	1
124	265	560	3	1
124	266	393	2	1	10	1	167	1
124	267	403	1	1			51	1
124	268	352	3	1
124	269	390	2	1	13	2	-20	1
124	270	370	3	1
124	271	512	2	1	20	2	-142	1
124	272	353	2	1	179	1	-31	2
124	273	532	1	1			210	1
124	274	322	3	1
124	275	430	3	1
124	276	568	2	1	-36	3	-138	1
124	277	591	2	1	-131	4	-67	1
124	278	524	3	1
124	279	639	3	1
124	280	404	3	1
124	281	460	1	1	-87	1	56	1
124	282	547	2	1	-66	1	-143	2
124	283	481	1	1	30	1	67	2
124	284	451	2	1			-37	1
124	285	414	3	1
124	286	609	3	1
124	287	557	2	1	-76	4	52	1
124	288	402	2	1	89	4	207	2
124	289	562	2	1	-71	3	47	3
124	290	506	2	1	-15	2	27	3
124	291	716	2	1	-225	1	-183	2
124	292	491	1	1			-42	1
124	293	533	3	1
124	294	604	3	1
124	295	477	2	1	51	1	127	1
124	296	528	1	1			-104	1
124	297	632	3	1
124	298	624	2	1	-127	2	-125	1
124	299	499	3	1
124	300	497	1	1			13	1
124	301	484	3	1
124	302	555	1	1	-69	4	49	1
124	303	506	3	1
124	304	420	1	1	49	3	9	1
124	305	411	3	1
124	306	355	1	1	-16	1	-56	1
124	307	371	2	1			-12	2
124	308	357	2	1	-2	2	2	1
124	309	359	3	1
124	310	365	3	1
124	311	432	2	1	89	1	-67	1
124	312	521	1	1			156	2
124	313	405	1	1	-42	1	-34	3
124	314	447	2	1	-50	1	-8	2
124	315	397	1	1			-42	1
124	316	439	3	1
124	317	369	2	1	109	1	70	1
124	318	478	1	1			60	1
124	319	418	3	1
124	320	419	2	1	-17	2	-44	1
124	321	375	3	1
124	322	402	1	1	-79	2	-14	1
124	323	416	3	1
124	324	481	2	1	-9	2	-112	1
124	325	369	3	1
124	326	472	1	1	-16	2	103	1
124	327	685	1	1	197	1	316	2
124	328	488	2	1			-119	3
124	329	438	2	1	110	1	-69	4
124	330	548	1	1			179	5
124	331	711	1	1	164	1
124	332	547	2	1	-96	1
124	333	451	1	1
124	334	446	1	1	38	1
124	335	408	2	1
124	337	395	1	1	-74	2
124	338	398	1	1	-71	1
124	339	469	2	1			94	5
124	340	559	2	1	-42	1	4	4
124	341	517	1	1			-46	3
124	342	634	1	1	75	2	71	2
124	343	403	1	1	-156	3	-160	1
124	344	563	3	1
124	345	595	1	1	36	5	286	1
124	346	309	3	1
124	347	342	3	1
124	348	370	1	1			-38	1
124	349	408	3	1
124	350	334	3	1
124	351	424	3	1
124	353	483	1	1	73	1	167	2
124	354	410	2	1			-94	1
124	355	316	3	1
124	356	555	1	1	145	2	239	1
124	357	633	1	1	223	3	317	2
124	358	360	1	1	-50	4	44	3
211	121	347	1	1	23	1	75	5
211	122	324	2	1	-98	1	-52	4
211	123	226	1	1			-46	3
211	124	258	1	1	-66	2	-14	2
211	125	288	1	1	-28	2	16	1
211	126	272	3	1
211	127	316	2	1	12	2	-19	1
211	128	297	3	1
211	129	328	1	1	116	2	106	1
211	130	222	3	1
211	131	212	2	1			10	1
211	132	318	2	1	-50	3	70	1
211	133	388	3	1
211	134	327	3	1
211	135	268	1	1			-244	1
211	136	512	3	1
211	137	405	1	1	160	4	7	1
211	138	398	3	1
211	139	346	1	1	101	2	-130	1
211	140	476	3	1
211	141	245	2	1			9	1
211	142	254	3	1
211	143	573	2	1	-307	2	-354	1
211	144	219	3	1
211	145	266	1	1	28	1	47	1
211	146	238	2	1			-19	2
211	147	206	2	1	36	1	35	2
211	148	242	1	1			1	1
211	149	241	3	1
211	150	298	1	1	92	3	57	1
211	151	301	1	1	-178	3	-21	2
211	152	327	1	1	-152	2	5	1
211	153	322	3	1
211	154	479	2	1			-209	1
211	155	270	3	1
211	156	250	2	1	77	4	20	1
211	157	584	2	1	-257	4	-314	2
211	158	288	2	1	39	3	-18	3
211	159	279	2	1	48	2	193	3
211	160	224	2	1	103	1	248	2
211	161	327	1	1			-145	1
211	162	472	3	1
211	163	349	3	1
211	164	274	1	1	36	2	-75	1
211	165	230	1	1	-8	1	-119	2
211	166	238	2	1			28	3
211	167	302	2	1	-72	2	-36	2
211	168	232	2	1	-2	3	34	1
211	169	266	3	1
211	171	203	3	1
211	172	232	2	1	63	2	15	1
211	173	247	3	1
211	174	295	1	1	10	2	66	1
211	175	229	3	1
211	176	285	2	1	47	1	-56	1
211	177	332	1	1			5	1
211	178	327	3	1
211	179	312	2	1	11	1	15	1
211	180	323	1	1			40	2
211	181	374	1	1	-170	2	91	1
211	182	283	3	1
211	183	544	2	1	-241	2	-261	1
211	184	349	2	1	-46	1	11	2
211	185	303	1	1			-57	1
211	186	360	3	1
211	187	330	2	1	-27	2	30	1
211	188	338	2	1	-93	2	-16	1
211	189	322	3	1
211	190	245	1	1			31	1
211	191	214	3	1
211	192	581	3	1
211	193	469	2	1	-147	1	112	1
211	194	322	1	1			-259	2
211	195	457	1	1	177	1	-124	3
211	196	280	2	1			46	4
211	197	217	2	1	240	2	109	3
211	198	262	2	1	-1	3	64	2
211	199	315	2	1	-54	2	11	1
211	200	326	3	1
211	201	261	1	1	-200	2	-116	1
211	202	377	3	1
211	203	461	2	1	-163	2	-49	1
211	204	412	3	1
211	205	298	1	1			-26	1
211	206	324	3	1
211	207	355	1	1	24	1	31	1
211	208	331	2	1	-86	1	-7	2
211	209	245	1	1			-79	3
211	210	292	1	1	-190	1	-32	4
211	211	482	2	1	81	1	-109	5
211	212	563	1	1	228	1	190	4
211	213	335	2	1	-59	1	38	3
211	214	276	1	1			-97	2
211	215	443	1	1	108	2	70	1
211	216	373	3	1
211	217	605	3	1
211	218	361	2	1	82	3	89	1
211	219	450	3	1
211	220	304	3	1
211	221	320	2	1	78	1	-16	1
211	222	398	1	1			90	1
211	223	308	3	1
211	224	426	2	1	-28	2	-118	1
211	225	231	2	1	167	3	71	1
211	226	302	3	1
211	227	268	3	1
211	228	350	2	1	-99	4	-82	1
211	230	297	3	1
211	231	224	3	1
211	232	251	1	1	-291	2	9	1
211	233	242	3	1
211	234	542	2	1	-119	2	-300	1
211	235	305	2	1	118	1	-63	2
211	236	423	1	1			181	3
211	237	463	1	1	158	2	221	4
211	238	526	1	1	221	3	284	5
212	121	579	2	1	-245	1	-194	5
212	122	334	1	1			-51	4
212	123	330	1	1	-249	2	-55	3
212	124	604	1	1	161	3	219	2
212	125	483	1	1	40	2	98	1
212	126	385	3	1
212	127	443	2	1	-29	2	-58	1
212	128	451	2	1	-37	1	-66	2
212	129	414	1	1			29	3
212	130	420	1	1	-10	2	-3	3
212	131	382	1	1	-48	1	-41	2
212	132	430	2	1			-7	1
212	133	423	3	1
212	134	567	2	1	-185	3	-222	1
212	135	345	3	1
212	136	373	3	1
212	137	642	2	1			-289	1
212	138	353	3	1
212	139	349	3	1
212	140	543	2	1			-194	1
212	141	319	2	1			189	2
212	142	300	2	1			208	1
212	143	508	3	1
212	144	389	2	1	11	4	119	1
212	145	653	2	1	-253	3	-255	2
212	146	326	2	1	74	2	72	1
212	147	398	3	1
212	148	400	1	1	-9	1	2	1
212	149	409	2	1	-63	1	-11	2
212	150	346	1	1			36	2
212	151	464	1	1	-89	2	154	1
212	152	310	3	1
212	153	553	2	1			-243	1
212	154	457	2	1	7	3	-147	2
212	155	436	2	1	28	4	-148	2
212	156	421	2	1	43	5	-133	1
212	157	288	3	1
212	158	355	2	1	28	4	-67	1
212	159	315	2	1	68	3	-27	2
212	160	350	2	1	33	2	-62	3
212	161	474	2	1	-91	1	-110	4
212	162	383	1	1			19	3
212	163	363	1	1	-27	1	-1	2
212	164	390	2	1			-26	1
212	165	364	3	1
212	166	489	1	1	99	2	31	1
212	167	458	3	1
212	168	516	1	1	126	4	58	1
212	169	501	1	1	111	5	-117	2
212	170	313	1	1			-305	1
212	171	618	3	1
212	172	534	1	1			-84	1
212	173	384	1	1			28	1
212	174	356	3	1
212	175	345	3	1
212	176	359	3	1
212	177	312	3	1
212	178	535	3	1
212	179	433	3	1
212	180	394	3	1
212	181	514	1	1			120	1
212	182	532	1	1			138	2
212	183	475	1	1	-14	5	81	3
212	184	424	1	1	-65	4	-12	3
212	185	478	1	1	-11	3	42	2
212	186	493	1	1	4	2	57	1
212	187	436	3	1
212	188	489	2	1	9	1	-53	1
212	189	498	1	1			62	2
212	190	367	1	1	-122	2	-69	3
212	191	394	1	1	-95	3	-32	3
212	192	542	1	1	53	4	116	2
212	194	426	3	1
212	195	379	1	1	34	3	-61	1
212	196	440	3	1
212	197	502	3	1
212	198	345	2	1	117	3	214	1
212	199	559	3	1
212	200	607	2	1	-145	1	-48	1
212	201	462	1	1			13	1
212	202	449	3	1
212	203	413	3	1
212	204	429	3	1
212	205	392	1	1	-215	5	29	1
212	206	363	3	1
212	207	340	3	1
212	208	283	3	1
212	210	461	3	1
212	211	345	1	1	58	1	-116	1
212	212	287	2	1			507	1
212	213	794	3	1
212	214	402	1	1	115	2	-392	1
212	215	384	1	1	-38	3	37	1
212	216	347	3	1
212	217	301	1	1	-121	1	-46	1
212	218	422	2	1			-75	2
212	219	343	2	1	8	2	39	3
212	220	451	2	1	-100	1	-69	2
212	221	351	1	1			-31	1
212	222	382	3	1
212	223	550	2	1	-199	2	-168	1
212	224	379	2	1	-28	3	-9	1
212	225	370	3	1
212	226	440	3	1
212	227	498	2	1	-42	2	-58	1
212	228	334	2	1	122	1	106	2
212	229	456	1	1	80	1	-200	2
212	230	376	2	1			280	1
212	231	656	3	1
212	232	436	2	1	20	3	220	1
212	233	446	2	1	10	4	210	2
212	234	512	2	1	-47	4	144	3
212	235	415	2	1	50	3	241	4
212	236	521	2	1	-56	2	135	5
212	237	441	2	1	24	1
212	238	465	1	1
213	121	792	3	1
213	122	625	3	1
213	123	548	2	1			-38	1
213	124	510	3	1
213	125	878	3	1
213	126	710	3	1
213	127	668	2	1	517	4	42	1
213	128	537	2	1	648	3	401	2
213	129	487	2	1	698	2	451	1
213	130	938	3	1
213	131	1185	1	1			249	1
213	132	936	3	1
213	133	683	1	1	221	1	-253	1
213	134	462	2	1			474	2
213	135	898	2	1	-215	2	38	3
213	136	612	2	1	143	3	388	4
213	137	415	2	1	340	2	585	3
213	138	510	2	1	245	1	490	2
213	139	755	1	1			-245	1
213	140	1000	3	1
213	141	594	1	1	-96	3	-159	1
213	142	753	3	1
213	143	568	3	1
213	144	690	2	1	-264	1	-122	1
213	145	426	1	1			-239	2
213	146	809	1	1	-61	2	144	1
213	147	665	3	1
213	148	870	2	1	-56	1	-205	1
213	149	814	1	1			-35	1
213	150	849	3	1
213	151	625	3	1
213	152	1126	2	1	-245	2	-429	1
213	153	697	3	1
213	154	881	1	1			184	1
213	155	752	1	1	73	3	81	2
213	156	688	1	1	9	2	17	1
213	157	671	3	1
213	158	679	2	1			23	1
213	159	702	3	1
213	160	1373	2	1	-712	3	-745	1
213	161	628	3	1
213	162	767	2	1	-106	1	-139	1
213	163	661	1	1			68	1
213	164	593	3	1
213	165	878	1	1	241	2	-233	1
213	166	1111	3	1
213	167	637	2	1	68	1	474	1
213	168	705	1	1	168	1	188	2
213	169	537	2	1			-20	1
213	170	517	3	1
213	171	830	2	1	-9	2	-300	1
213	172	530	3	1
213	173	821	1	1			291	1
213	174	773	1	1	-57	3	-274	1
213	175	1047	3	1
213	176	664	1	1	61	2	13	1
213	177	651	3	1
213	178	603	2	1	187	1	48	1
213	179	790	1	1			139	2
213	180	650	1	1	47	2	-1	3
213	181	695	1	1	36	3	44	4
213	183	959	1	1	300	1	126	3
213	184	659	2	1	-7	1	174	2
213	185	652	1	1			-181	1
213	186	833	3	1
213	187	589	3	1
213	188	766	1	1	174	1	177	1
213	189	592	2	1	205	1	-3	2
213	190	797	1	1	-12	1	208	3
213	191	809	2	1			-166	3
213	192	1326	2	1	-91	1	-683	2
213	193	1235	1	1			592	1
213	194	643	3	1
213	195	847	2	1	-120	2	493	1
213	196	1340	3	1
213	197	727	1	1	67	1	-613	1
213	198	660	2	1	50	1	-271	2
213	199	710	1	1			321	1
213	200	389	3	1
213	201	742	3	1
213	202	1090	1	1	504	2	348	1
213	203	607	1	1	21	1	-135	2
213	204	586	2	1	732	1	-36	3
213	205	1318	1	1			768	2
213	206	1412	1	1	826	2	862	1
213	207	550	3	1
213	208	439	3	1
213	209	515	1	1	-366	2	76	1
213	210	425	1	1	-456	1	-14	2
213	211	881	2	1			-442	3
213	212	954	2	1	115	2	-515	4
213	213	833	2	1	236	1	-205	4
213	214	1069	1	1	388	1	441	3
213	215	681	2	1	21	1	-53	2
213	216	702	1	1			74	1
213	217	628	3	1
213	219	533	1	1	-778	3	-165	2
213	220	846	1	1	-465	2	148	1
213	221	698	3	1
213	222	1311	2	1			-613	1
213	223	703	2	1	-45	3	-72	1
213	224	631	3	1
213	225	918	2	1	-260	1	-287	1
213	226	658	1	1	226	1	-70	2
213	227	432	2	1			296	1
213	228	728	3	1
213	229	704	2	1	229	1	24	1
213	230	933	1	1	256	1	131	2
213	231	677	2	1			125	1
213	232	802	3	1
213	233	725	3	1
213	234	705	3	1
213	235	1188	3	1
213	236	449	2	1	91	1	739	1
213	237	540	1	1			-648	2
213	238	458	1	1	-767	1	-730	3
213	239	1225	2	1			-37	4
215	121	397	3	1
215	122	528	3	1
215	123	342	1	1	18	3	-63	1
215	124	405	3	1
[truncated: 7,944 more rows]
